# Supplementary material
Source: Elsevier journal article supplement (https://www.sciencedirect.com/science/article/pii/S1699258X21002230)
Supplement: mmc1 [file S1699258X21002230:mmc1.pdf]

## Material Suplementario

# Guía de práctica clínica para la Detección Temprana, Diagnóstico y Tratamiento de pacientes con Espondiloartritis Periférica ASOREUMA 2020

---

### Contenido

|                                                                                                                                                                                                                                                                                                                      |    |
|----------------------------------------------------------------------------------------------------------------------------------------------------------------------------------------------------------------------------------------------------------------------------------------------------------------------|----|
| Pregunta 1: ¿En pacientes adultos con Espondiloartritis Periférica, se debe usar AINES o DMARDs convencionales como primera opción de tratamiento farmacológico, dada su efectividad en el control de la enfermedad y perfil de seguridad? .....                                                                     | 5  |
| Antecedentes .....                                                                                                                                                                                                                                                                                                   | 5  |
| Efectividad.....                                                                                                                                                                                                                                                                                                     | 6  |
| Valores y preferencia de pacientes .....                                                                                                                                                                                                                                                                             | 8  |
| Consumo de recursos y costos .....                                                                                                                                                                                                                                                                                   | 9  |
| Pregunta 1: Marco de trabajo –De la evidencia a las decisiones .....                                                                                                                                                                                                                                                 | 10 |
| Referencias: .....                                                                                                                                                                                                                                                                                                   | 23 |
| Pregunta 2: ¿En pacientes adultos con Espondiloartritis Periférica se debe usar Glucocorticoides (locales o sistémicos) dada su efectividad en el control de la enfermedad y perfil de seguridad?.....                                                                                                               | 24 |
| Antecedentes .....                                                                                                                                                                                                                                                                                                   | 24 |
| Evidencia.....                                                                                                                                                                                                                                                                                                       | 25 |
| Preferencia de pacientes.....                                                                                                                                                                                                                                                                                        | 27 |
| Recursos requeridos y costos .....                                                                                                                                                                                                                                                                                   | 29 |
| Pregunta 2: Marco de trabajo –De la evidencia a las decisiones .....                                                                                                                                                                                                                                                 | 31 |
| Referencias .....                                                                                                                                                                                                                                                                                                    | 43 |
| Pregunta 3: ¿ En pacientes adultos con Espondiloartritis Periférica y falla a DMARDs convencionales, se debe usar como primera opción de terapia biológica un anti TNF $\alpha$ o un anti IL-17 o un anti IL12-23 o inhibidores JAK, dada su efectividad en el control de la enfermedad y perfil de seguridad? ..... | 46 |

## GPC para pacientes con Espondiloartritis Periférica ASOREUMA

|                                                                                                                                                                                                                                                                                   |     |
|-----------------------------------------------------------------------------------------------------------------------------------------------------------------------------------------------------------------------------------------------------------------------------------|-----|
| Antecedentes .....                                                                                                                                                                                                                                                                | 46  |
| Evidencia.....                                                                                                                                                                                                                                                                    | 47  |
| Valores y preferencia de pacientes .....                                                                                                                                                                                                                                          | 51  |
| Consumo de recursos y costos .....                                                                                                                                                                                                                                                | 51  |
| Pregunta 3: Marco de trabajo –De la evidencia a las decisiones .....                                                                                                                                                                                                              | 52  |
| Referencias .....                                                                                                                                                                                                                                                                 | 67  |
| Pregunta 4. ¿En pacientes adultos con Espondiloartritis Periférica y falla a primera línea con DMARDs Biológicos, cuál DMARD Biológico se debe usar como siguiente opción de tratamiento, considerando su efectividad en el control de la enfermedad y perfil de seguridad? ..... |     |
| Antecedentes .....                                                                                                                                                                                                                                                                | 70  |
| Efectividad.....                                                                                                                                                                                                                                                                  | 71  |
| Valores y preferencia de pacientes .....                                                                                                                                                                                                                                          | 74  |
| Costos .....                                                                                                                                                                                                                                                                      | 74  |
| Pregunta 4: Marco de trabajo –De la evidencia a las decisiones .....                                                                                                                                                                                                              | 75  |
| Referencias: .....                                                                                                                                                                                                                                                                | 86  |
| Pregunta 5. ¿En el tratamiento de pacientes adultos con Espondiloartritis y uveítis asociada como manifestación extra articular, se debe usar DMARDs convencionales dada su efectividad en el control de la enfermedad y perfil de seguridad? .....                               |     |
| Antecedentes .....                                                                                                                                                                                                                                                                | 87  |
| Evidencia.....                                                                                                                                                                                                                                                                    | 88  |
| Control de la enfermedad .....                                                                                                                                                                                                                                                    | 88  |
| Valores y preferencia de pacientes .....                                                                                                                                                                                                                                          | 89  |
| Consumo de recursos y Costos .....                                                                                                                                                                                                                                                | 90  |
| Pregunta 5: Marco de trabajo –De la evidencia a las decisiones .....                                                                                                                                                                                                              | 91  |
| Evaluación.....                                                                                                                                                                                                                                                                   | 91  |
| Resumen de Juicios .....                                                                                                                                                                                                                                                          | 97  |
| Tipo de Recomendación .....                                                                                                                                                                                                                                                       | 98  |
| Conclusiones.....                                                                                                                                                                                                                                                                 | 98  |
| Referencias .....                                                                                                                                                                                                                                                                 | 100 |
| Pregunta 6. ¿En pacientes adultos con Espondiloartritis y uveítis asociada como manifestación extra articular, se debe usar DMARD biológicos dada su efectividad en el control de la enfermedad y perfil de seguridad? .....                                                      |     |
| Antecedentes .....                                                                                                                                                                                                                                                                | 102 |
| Efectividad.....                                                                                                                                                                                                                                                                  | 103 |
| Valores y preferencia de pacientes .....                                                                                                                                                                                                                                          | 106 |
| Consumo de recursos y costos .....                                                                                                                                                                                                                                                | 106 |

## GPC para pacientes con Espondiloartritis Periférica ASOREUMA

|                                                                                                                                                                                                                                                                                                                                                                                           |     |
|-------------------------------------------------------------------------------------------------------------------------------------------------------------------------------------------------------------------------------------------------------------------------------------------------------------------------------------------------------------------------------------------|-----|
| Pregunta 6: Marco de trabajo –De la evidencia a las decisiones .....                                                                                                                                                                                                                                                                                                                      | 107 |
| Pregunta 7. ¿En el tratamiento de pacientes adultos con Espondiloartritis Periférica y enfermedad inflamatoria intestinal asociada, se debe usar DMARDs convencionales dada su efectividad en el control de la enfermedad y su perfil de seguridad? .....                                                                                                                                 | 120 |
| Antecedentes .....                                                                                                                                                                                                                                                                                                                                                                        | 120 |
| Efectividad y seguridad .....                                                                                                                                                                                                                                                                                                                                                             | 121 |
| Valores y preferencia de pacientes .....                                                                                                                                                                                                                                                                                                                                                  | 122 |
| Costos .....                                                                                                                                                                                                                                                                                                                                                                              | 122 |
| Pregunta 7: Marco de trabajo –De la evidencia a las decisiones .....                                                                                                                                                                                                                                                                                                                      | 123 |
| Referencias .....                                                                                                                                                                                                                                                                                                                                                                         | 133 |
| Pregunta 8. ¿En el tratamiento de pacientes adultos con Espondiloartritis Periférica y enfermedad inflamatoria intestinal asociada, se debe usar DMARDs Biológicos (anti TNF $\alpha$ , anti IL-17, anti IL12-23, inhibidores JAK) dada su efectividad en el control enfermedad, y perfil de seguridad?.....                                                                              | 134 |
| Antecedentes .....                                                                                                                                                                                                                                                                                                                                                                        | 134 |
| Valores y preferencia de pacientes .....                                                                                                                                                                                                                                                                                                                                                  | 136 |
| Costos .....                                                                                                                                                                                                                                                                                                                                                                              | 137 |
| Pregunta 8: Marco de trabajo –De la evidencia a las decisiones .....                                                                                                                                                                                                                                                                                                                      | 138 |
| Pregunta 9: Para evaluar la actividad de la enfermedad en pacientes adultos con Espondiloartritis Periférica, es útil (características operativas de la prueba*) el uso de las escalas de clinimetría: "Disease Activity Score-28 (DAS 28)" vs "Disease Activity for Psoriatic Arthritis (DAPSA)" vs "Minimal disease activity (MDA) "? .....                                             | 151 |
| Antecedentes .....                                                                                                                                                                                                                                                                                                                                                                        | 151 |
| Efectividad .....                                                                                                                                                                                                                                                                                                                                                                         | 152 |
| Valores y preferencia de pacientes.....                                                                                                                                                                                                                                                                                                                                                   | 155 |
| Costos .....                                                                                                                                                                                                                                                                                                                                                                              | 155 |
| Pregunta 9: Tabla de resúmenes de hallazgos GRADE .....                                                                                                                                                                                                                                                                                                                                   | 170 |
| Pregunta 9: Apéndice 1. ....                                                                                                                                                                                                                                                                                                                                                              | 171 |
| Componentes en el cálculo de medición de actividad de la enfermedad .....                                                                                                                                                                                                                                                                                                                 | 171 |
| Pregunta 10.¿En el tratamiento de pacientes adultos con Espondiloartritis Periférica, el uso de terapia combinada de MTX y DMARDs biológicos (anti TNF $\alpha$ , anti IL-17, anti IL 12-23, inhibidores JAK), es más efectivo en el control enfermedad, y seguro que el uso de monoterapia con DMARDs biológicos (anti TNF $\alpha$ , anti IL-17, anti IL 12-23, inhibidores JAK)? ..... | 174 |
| Antecedentes .....                                                                                                                                                                                                                                                                                                                                                                        | 174 |
| Efectividad .....                                                                                                                                                                                                                                                                                                                                                                         | 175 |
| Seguridad .....                                                                                                                                                                                                                                                                                                                                                                           | 176 |
| Valores y preferencia de pacientes.....                                                                                                                                                                                                                                                                                                                                                   | 177 |
| Consumo de recursos y costos .....                                                                                                                                                                                                                                                                                                                                                        | 177 |

## GPC para pacientes con Espondiloartritis Periférica ASOREUMA

|                                                                                 |     |
|---------------------------------------------------------------------------------|-----|
| Pregunta 10: Marco de trabajo –De la evidencia a las decisiones .....           | 179 |
| Evaluación .....                                                                | 179 |
| Resumen de Juicios.....                                                         | 186 |
| Tipo de Recomendación.....                                                      | 187 |
| Conclusiones .....                                                              | 187 |
| Referencias: .....                                                              | 190 |
| Resumen de las votaciones sobre las recomendaciones generadas por cada pregunta |     |

## GPC para pacientes con Espondiloartritis Periférica ASOREUMA

**Pregunta 1:** ¿En pacientes adultos con Espondiloartritis Periférica, se debe usar AINES o DMARDs convencionales como primera opción de tratamiento farmacológico, dada su efectividad en el control de la enfermedad y perfil de seguridad?

|                     |                                                               |         |
|---------------------|---------------------------------------------------------------|---------|
| <b>Población</b>    | Pacientes con espondiloartritis periférica                    |         |
| <b>Intervención</b> | AINES, DMARDs convencionales                                  |         |
| <b>Comparación</b>  | AINES, DMARDs convencionales                                  |         |
| <b>Desenlaces</b>   | Control enfermedad-<br>Remisión/baja actividad de<br>síntomas | Crítico |
|                     | Control enfermedad-<br>Mejoría en escalas de<br>funcionalidad | Crítico |
|                     | Control enfermedad-<br>progresión radiográfica                | Crítico |
|                     | calidad de vida                                               | Crítico |
|                     | Perfil de seguridad: Eventos<br>adversos                      | Crítico |

### Antecedentes

La espondiloartritis (EspA) es una enfermedad sistémica con múltiples presentaciones (1) que abarca la inflamación del esqueleto axial (EspAax), y/o síntomas extraarticulares como psoriasis, uveítis o inflamación enfermedad intestinal (EII) y también manifestaciones articulares periféricas (2). La espondiloartritis periférica (EspAp) se presenta principalmente con artritis, entesitis o dactilitis periférica, sin compromiso del esqueleto axial (3), su diagnóstico puede ser retador particularmente en la ausencia de manifestaciones extraarticulares como uveítis, psoriasis o enfermedad inflamatoria intestinal(2). La evaluación de la actividad de la enfermedad debe incluir la evaluación objetiva de la presencia de inflamación particularmente entesitis(4). La artritis psoriásica es una afección inflamatoria que causa articulaciones dolorosas, edematizadas y rígidas, junto con tendones dolorosos y edema de dedos de manos y pies. Está asociado con la psoriasis, una enfermedad de la piel o las uñas(5).

En cuanto al tratamiento no existen recomendaciones estandarizadas para el tratamiento de la EspAp en general, sin embargo la liga europea contra el reumatismo

## GPC para pacientes con Espondiloartritis Periférica ASOREUMA

EULAR (por sus siglas en inglés) ha emitido recomendaciones específicas para el tratamiento de APs (4).

Dada la heterogeneidad de esta patología el tratamiento no se puede agrupar ya que difieren en términos de pronóstico y resultado. En el caso de la artritis psoriásica (APs) la guía de la EULAR realizó recomendaciones en cuanto a las manifestaciones periféricas; el tratamiento de primera línea recomendado son los analgésicos no esteroideos (AINES)(6), los glucocorticoides también son administrados especialmente en bajas dosis(7). En cuanto a los medicamentos antirreumáticos modificadores de la enfermedad (DMARDS por sus siglas en inglés) clásicos, estos han mostrado ser eficaces únicamente en el manejo de la artritis, han seguido históricamente el patrón de uso de la artritis reumatoidea, existe evidencia disponible para sulfasalazina, leflunomida y metotrexate con muestra de alguna efectividad en EspAp (8). Los pacientes con artritis psoriásica moderada a severa tienen como tratamiento los DMARDS convencionales, dentro de ellos, el metotrexato tiene un uso amplio en el tratamiento de la artritis periférica en la artritis psoriásica(9).

En este protocolo se responderá a la pregunta sobre el tratamiento de primera línea en esta patología.

### Efectividad

#### *DMARDS convencionales.*

La búsqueda de la literatura realizada (ver anexo 1-GPC) identificó para esta comparación una revisión sistemática de la literatura (RSL) realizada por Wilsdon et al(10) que comparó metotrexato vs placebo o metotrexato vs otros DMARDS convencionales. Los desenlaces principales fueron control enfermedad (número de pacientes con una respuesta positiva al tratamiento), mejoría en escalas de funcionalidad, calidad de vida, progresión radiográfica y eventos adversos serios (eventos adversos que requirieran admisión al hospital, unidad de cuidados intensivos, desarrollo de discapacidad de permanente o muerte) y suspensión del tratamiento por presentación de eventos adversos. Se incluyeron 8 estudios publicados entre el año 1964 y 2014, de los cuales 5 estudios (n=345) incluyeron la comparación metotrexato vs placebo y 4 compararon metotrexato con otro DMARD (leflunomida n=61), ciclosporina n=35), (oro n= 30) y (sulfasalazina n=24). El promedio de edad de pacientes incluidos en estos estudios osciló entre 26 a 52 años, el promedio de duración de la artritis psoriásica varió de 1 a 9 años. La dosis de metotrexato vario de 7,5mg a 25 mg vía oral, pero la mayoría recibieron 15 mg vía oral semanal.

#### *Control enfermedad por remisión/baja actividad de síntomas*

Este desenlace se incluyó en la RSL de Wilsdon 2019, en la comparación de metotrexato vs placebo (n=221) después de 6 meses de tratamiento se encontró que

## GPC para pacientes con Espondiloartritis Periférica ASOREUMA

la respuesta evaluada con criterios de respuesta de artritis psoriásica PsARC fue de 16% de más mejoría (4% a 28%) con metotrexato comparado con placebo RR 1,76 (IC 95% 1,14 a 2,70). La calidad de la evidencia para este desenlace fue baja por defectos en el diseño y por imprecisión.

La actividad de la enfermedad medido con DAS28- ERS se incluyó en un estudio de la RSL de Wilsdon 2019, en la comparación de metotrexato vs placebo (n=221) después de 6 meses de tratamiento se presentó una mejoría de 3% (7% mejor a 1% peor) o 0,26 puntos (0,65 mejor a 0,13 peor) en una escala de 0 a 10. La calidad de la evidencia para este desenlace fue baja por defectos en el diseño y por imprecisión.

### *Funcionalidad*

Este desenlace se incluyó un estudio de la RSL de Wilsdon 2019, en la comparación metotrexato vs placebo (n=221), después de 6 meses de tratamiento, la funcionalidad fue medida por HAQ, se encontró un cambio absoluto de -10% mejor con metotrexato (3 a 17% mejor) cambio relativo -30% con metotrexato (IC95%: 9% a 51%). Los pacientes con metotrexato tuvieron una función de 0,7 puntos vs 1 punto para los que se encontraban con placebo con una diferencia de 0,3 puntos (0,09 a 0,51) mejor en una escala de 0 a 3 en el cuestionario HAQ. La calidad de la evidencia para este desenlace fue baja por defectos en el diseño y por imprecisión.

### *Eventos adversos serios y no serios*

En cuanto a eventos adversos serios, este desenlace se incluyó en 3 estudios de la RSL de Wilsdon 2019, en la comparación metotrexato vs placebo (n=293), después de 6 meses de tratamiento se encontró una diferencia absoluta de 2% menos eventos adversos serios con metotrexato comparado con placebo (5% menos a 1% más); RR 0,26 (IC95% 0,03 a 2,26). La calidad de la evidencia para este desenlace fue baja por defectos en el diseño y por imprecisión.

En cuanto a suspensión del medicamento por eventos adversos, este desenlace se incluyó en 3 estudios de la RSL de Wilsdon 2019, en la comparación metotrexato vs placebo (n=293), después de 6 meses de tratamiento se encontró una diferencia absoluta de 1% menos eventos adversos serios con metotrexato comparado con placebo (4% menos a 6% más); RR 1,32 (IC95% 0,51 a 3,42). La calidad de la evidencia para este desenlace fue baja por defectos en el diseño y por imprecisión.

### **Metotrexato vs otros DMARDS**

Para esta comparación se identificó una RSL realizada por Wilsdon 2019 (10) ya mencionada previamente.

*Control enfermedad por remisión/baja actividad de síntomas*

## GPC para pacientes con Espondiloartritis Periférica ASOREUMA

Este desenlace se incluyó en un estudio de la RSL de Wilsdon 2019, en la comparación de metotrexato (7,5mg a 25 mg semanal) vs leflunomida (20 mg diario) (n=30) después de 6 meses de tratamiento se encontró que la respuesta evaluada con ACR50 fue de 4% de más de respondedores (22% menos a 31% más) con metotrexato comparado con leflunomida RR 1,05 (IC 95% 0,77 a 1,45). La calidad de la evidencia para este desenlace fue muy baja por defectos en el diseño y por imprecisión.

### *Mejoría en escalas de funcionalidad*

Este desenlace se incluyó en un estudio de la RSL de Wilsdon 2019, en la comparación de metotrexato (7,5mg a 25 mg semanal) vs leflunomida (20 mg diario) (n=31) después de 6 meses de tratamiento se encontró que la respuesta evaluada con HAQ fue de 4% de más de respondedores (1% mejor a 8% mejor) con metotrexato comparado con leflunomida. La calidad de la evidencia para este desenlace fue muy baja por defectos en el diseño y por imprecisión.

### *Eventos adversos serios y no serios*

Para el desenlace eventos adversos serios se incluyeron dos estudios en la RSL de Wilsdon 2019 (n=61) donde la presencia de eventos adversos en los dos brazos fue de 0 y no se realizó ningún cálculo adicional.

## Valores y preferencia de pacientes

Se identificaron dos estudios el primero de Nota y cols 2014(11) que evalúa las percepciones y preferencias en los pacientes en la toma de decisiones sobre el inicio de tratamiento con DMARDS, este estudio se realizó por medio de una encuesta a 894 pacientes con diagnóstico de Artritis reumatoide, artritis psoriásica o espondilitis anquilosante, en esta encuesta se evaluó 4 puntos específicamente: Iniciar tratamiento con un DMARD, iniciar metotrexato inyectado, iniciar con un DMARD biológico y disminuir o suspender un DMARD estas preferencias se evaluaron con la escala de preferencia de control. La proporción de respuesta a las encuestas fue del 58%. Para todas las decisiones (59% a 63%) prefirieron la toma de decisiones compartidas, en general los pacientes desean tener mayor participación en la toma de decisión en los 4 puntos, tener menor participación se reflejó en menor satisfacción con el tratamiento. El Segundo estudio realizado por Pasma y cols en el 2014 (12) evaluó los factores asociados a la adherencia de los pacientes a los DMARDS por medio de grupos focales incluyendo un total de 33 pacientes con menos de dos años en tratamiento con DMARDS; dentro de lo relatado por los pacientes muchos refirieron una percepción negativa de los DMARDS por los efectos secundarios y un concepto inadecuado del medicamento como un “veneno” que estaba relacionado con experiencias previas negativas con los medicamentos, negación de la enfermedad y la experiencia negativa relatada por otras personas.

## Consumo de recursos y costos

Se identificó una revisión sistemática de la literatura realizada por D'Angiolella y cols en el 2018(13) que evaluó costos de la enfermedad en pacientes con artritis psoriásica y costo-efectividad de las diferentes intervenciones para artritis psoriásica, incluyó siete estudios de costo efectividad y dos estudios de costo utilidad, dos estudios incluyeron un horizonte temporal de menos de un año, un estudio incluyó un horizonte temporal de un año, los demás incluyeron un horizonte analítico a largo plazo en promedio de 5 años a 40 años, 52 años y toda la vida. Dos estudios utilizaron modelos de decisión, cuatro estudios tomaron un modelo de Markov, los otros estudios utilizaron observación empírica directa. Los autores que llevaron a cabo estos estudios utilizaron diferentes estados de salud, lo más común, estado de salud al inicio del tratamiento, mejoría, deterioro y muerte. Los estudios fueron realizados en Estados Unidos, Canadá, Reino Unido, Italia y Alemania. El desenlace más común para medir efectividad fue años ajustados a calidad de vida (QALY).

Para evaluar efectividad se utilizó diferentes escalas de respuesta como respuesta del colegio Americano de Reumatología (ACR20, ACR50, ACR70 por sus siglas en inglés), Criterios de respuesta de artritis psoriásica (PsARC por sus siglas en inglés), el cuestionario de evaluación de salud (HAQ por sus siglas en inglés), el puntaje de Sharp modificado (TSS por sus siglas en inglés) y el índice de severidad y área de psoriasis ((PASI) 50/75/90 por sus siglas en inglés). Algunos estudios solo utilizaron la perspectiva del sistema de salud sin tener en cuenta los costos indirectos.

Los autores concluyen que los costos de los DMARDS biológicos son muy elevados sin embargo son medicamentos efectivos lo que resulta como una medida costo efectiva. En pacientes con un DMARD previo Certolizumab pegol, fue el tratamiento optimo en los pacientes con artritis psoriásica moderada a severa reportando un ICER de £20,870 comparado con el mejor tratamiento de soporte que incluye el uso convencional de DMARDS. En pacientes con artritis psoriásica leve secukinumab fue el tratamiento óptimo con un ICERs en un rango de £21,772 a £23,928. En los pacientes naïve de biológico con dos o más DMARDs etanercept fue el tratamiento con el ICER más favorable £20,000 - 30,000/QALY.

La calidad de los estudios de la revisión es moderada ya que en algunos estudios no se tuvo en cuenta la incertidumbre en los costos y las consecuencias.

## Pregunta 1: Marco de trabajo –De la evidencia a las decisiones

| Pregunta 1             |                                                                                                                                                                                                                     |
|------------------------|---------------------------------------------------------------------------------------------------------------------------------------------------------------------------------------------------------------------|
| POBLACION              | <i>Pacientes adultos con espondilitis periférica</i>                                                                                                                                                                |
| INTERVENCIÓN           | <i>Medicamentos en primera línea de tratamiento- AINES,</i>                                                                                                                                                         |
| COMPARACIÓN            | <i>DMARDs convencionales</i>                                                                                                                                                                                        |
| DESENLACES PRINCIPALES | <i>Efectividad (control de la enfermedad, remisión/baja actividad de síntomas, mejoría de escalas de funcionalidad y calidad de vida, progresión radiográfica)<br/>Seguridad del medicamento (eventos adversos)</i> |
| ÁMBITO                 | <i>Ambulatorio</i>                                                                                                                                                                                                  |
| PERSPECTIVA            | <i>Recomendación de GPC en el contexto de espondiloartritis</i>                                                                                                                                                     |
| CONFLICTO DE INTERÉS:  | <i>El panel en su totalidad declaró no tener conflictos de interés</i>                                                                                                                                              |

## Evaluación

| <b>Problema</b><br>Es el problema una prioridad?                                                                                                                            |                                                                                                                                                                                                                                                                                                                                                                                                                                                                                                                                                                                                                                                                                                                                                                                                                                                                                                                                                                                                                                                                                                                                                                                                                                                                                                                                                             |                             |
|-----------------------------------------------------------------------------------------------------------------------------------------------------------------------------|-------------------------------------------------------------------------------------------------------------------------------------------------------------------------------------------------------------------------------------------------------------------------------------------------------------------------------------------------------------------------------------------------------------------------------------------------------------------------------------------------------------------------------------------------------------------------------------------------------------------------------------------------------------------------------------------------------------------------------------------------------------------------------------------------------------------------------------------------------------------------------------------------------------------------------------------------------------------------------------------------------------------------------------------------------------------------------------------------------------------------------------------------------------------------------------------------------------------------------------------------------------------------------------------------------------------------------------------------------------|-----------------------------|
| JUICIO                                                                                                                                                                      | EVIDENCIA DE LA INVESTIGACION                                                                                                                                                                                                                                                                                                                                                                                                                                                                                                                                                                                                                                                                                                                                                                                                                                                                                                                                                                                                                                                                                                                                                                                                                                                                                                                               | CONSIDERACIONES ADICIONALES |
| <ul style="list-style-type: none"> <li>○ No</li> <li>○ Probablemente No</li> <li>○ Probablemente Si</li> <li>○ Si</li> <li>○ Es variable</li> <li>○ No se conoce</li> </ul> | <p>No existen recomendaciones estandarizadas para el tratamiento de la EspAp en general, sin embargo la liga europea contra el reumatismo EULAR (por sus siglas en inglés) ha emitido recomendaciones específicas para el tratamiento de APs (4).</p> <p>Dada la heterogeneidad de esta patología el tratamiento no se puede agrupar ya que difieren en términos de pronóstico y resultado. En el caso de la artritis psoriásica (APs) la guía de la EULAR realizó recomendaciones en cuanto a las manifestaciones periféricas; el tratamiento de primera línea recomendado son los analgésicos no esteroideos (AINES)(6), los glucocorticoides también son administrados especialmente en bajas dosis(7). En cuanto a los DMARDs clásicos, estos han mostrado ser eficaces únicamente en el manejo de la artritis, han seguido históricamente el patrón de uso de la artritis reumatoide, existe evidencia disponible para sulfasalazina, leflunomida y metotrexate con muestra de alguna efectividad en EspAp (8).</p> <p>Los pacientes con artritis psoriásica moderada a severa tienen como tratamiento medicamentos antirreumáticos modificadores de la enfermedad (DMARDS por sus siglas en inglés) convencionales, dentro de ellos, el metotrexato tiene un uso amplio en el tratamiento de la artritis periférica en la artritis psoriásica(9).</p> |                             |

| Efectos deseables (beneficios de la opción a recomendar)<br>¿Qué tan sustanciales son los efectos deseables de la opción?                                         |                                                                                   |                                       |                                        |                                 |                                                                                                                                                                                              |
|-------------------------------------------------------------------------------------------------------------------------------------------------------------------|-----------------------------------------------------------------------------------|---------------------------------------|----------------------------------------|---------------------------------|----------------------------------------------------------------------------------------------------------------------------------------------------------------------------------------------|
| JUICIO                                                                                                                                                            | EVIDENCIA DE LA INVESTIGACION                                                     |                                       |                                        |                                 | CONSIDERACIONES ADICIONALES                                                                                                                                                                  |
| <ul style="list-style-type: none"> <li>○ Triviales</li> <li>○ Pequeños</li> <li>○ Moderados</li> <li>○ Grandes</li> <li>○ Varían</li> <li>○ No se sabe</li> </ul> | 1.-DMARS metotrexato vs placebo: tiempo de seguimiento 6 meses                    |                                       |                                        |                                 | Se encontró evidencia de metotrexato en una RSL; de los demás DMARDS no existe evidencia contundente. El panel de expertos sugirió agregar azatioprina por un estudio de 1995                |
|                                                                                                                                                                   | <b>Desenlaces</b>                                                                 | <b>Nº de participantes (estudios)</b> | <b>Certeza de la evidencia (GRADE)</b> | <b>Efecto Relativo (95% CI)</b> | <b>Efecto absoluto anticipado (95% CI)</b>                                                                                                                                                   |
|                                                                                                                                                                   | Respuesta terapéutica-PsARC                                                       | 1 ECAs (221)                          | Baja                                   | Risk ratio 1,76 (1,14;2,7)      | Diferencia absoluta -16% más respuesta al tratamiento con metotrexato (4% más a 28% más); cambio relativo - 76% más respuesta al tratamiento con metotrexato (14% más a 170% más) 6 (5 a 25) |
|                                                                                                                                                                   | Función evaluada con HAQ Escala de 0 a 3 (0 <u>Muestra no mejoría funcional</u> ) | 1 ECA (221)                           | Baja                                   |                                 | Cambio absoluto - 10% Mejor con MTX (3% mayor a 17% Mejor).                                                                                                                                  |

| Efectos Indeseables<br>¿Qué tan sustanciales son los efectos indeseables que se pueden anticipar?                                                                 |                                                                                                |                                       |                                        |                                 |                                                                    |
|-------------------------------------------------------------------------------------------------------------------------------------------------------------------|------------------------------------------------------------------------------------------------|---------------------------------------|----------------------------------------|---------------------------------|--------------------------------------------------------------------|
| JUICIO                                                                                                                                                            | EVIDENCIA DE LA INVESTIGACION                                                                  |                                       |                                        |                                 | CONSIDERACIONES ADICIONALES                                        |
| <ul style="list-style-type: none"> <li>○ Triviales</li> <li>○ Pequeños</li> <li>○ Moderados</li> <li>○ Grandes</li> <li>○ Varían</li> <li>○ No se sabe</li> </ul> | No hubo diferencias entre los pacientes expuestos al MTX a dos diferentes dosis vs el placebo. |                                       |                                        |                                 |                                                                    |
|                                                                                                                                                                   | <b>Desenlaces</b>                                                                              | <b>Nº de participantes (estudios)</b> | <b>Certeza de la evidencia (GRADE)</b> | <b>Efecto Relativo (95% CI)</b> | <b>Efecto absoluto anticipado (95% CI)</b>                         |
|                                                                                                                                                                   | Eventos adversos serios                                                                        | 3 ECAs (293)                          | Baja                                   | RR 0,26 (0,03 a 2,26)           | Diferencia absoluta -2% menos eventos con MTX (5% menos a 1% más). |
|                                                                                                                                                                   | Suspensiones por Eventos adversos                                                              | 3 ECAs (293)                          | Baja                                   | RR 1,32 (0,51 a 3,42)           | Diferencia absoluta -1% más eventos con MTX (4% menos a 6% más)    |

| <b>Certeza en la Evidencia</b><br>¿Cuál es la certeza en la evidencia global sobre los efectos de la opción a recomendar?                                                                                            |                                                                                                                                                                                                                                                                                                                                                                                                                                                                                                                                                                                                                                                                                                                                                                                                                                                                  |                                    |                      |                                 |                                                                  |          |              |                          |          |              |                  |          |              |  |
|----------------------------------------------------------------------------------------------------------------------------------------------------------------------------------------------------------------------|------------------------------------------------------------------------------------------------------------------------------------------------------------------------------------------------------------------------------------------------------------------------------------------------------------------------------------------------------------------------------------------------------------------------------------------------------------------------------------------------------------------------------------------------------------------------------------------------------------------------------------------------------------------------------------------------------------------------------------------------------------------------------------------------------------------------------------------------------------------|------------------------------------|----------------------|---------------------------------|------------------------------------------------------------------|----------|--------------|--------------------------|----------|--------------|------------------|----------|--------------|--|
| <b>JUICIO</b>                                                                                                                                                                                                        | <b>EVIDENCIA DE LA INVESTIGACION</b>                                                                                                                                                                                                                                                                                                                                                                                                                                                                                                                                                                                                                                                                                                                                                                                                                             | <b>CONSIDERACIONES ADICIONALES</b> |                      |                                 |                                                                  |          |              |                          |          |              |                  |          |              |  |
| <ul style="list-style-type: none"> <li>○ Muy baja</li> <li>○ Baja</li> <li>○ <b>Moderada</b></li> <li>○ Alta</li> <li>○ No se identificaron estudios</li> </ul>                                                      | <p>Se encontró evidencia indirecta de una revisión sistemática de la literatura que evaluó metotrexato vs placebo y metotrexato vs otros DMARDS encontrando evidencia de baja sobre el beneficio de este sin diferencias en el perfil de seguridad en el manejo de pacientes con diagnóstico de artritis psoriásica.</p> <table> <tr> <th>Desenlace</th><th>Importancia Relativa</th><th>Certeza de la evidencia (GRADE)</th></tr> <tr> <td>Control enfermedad por remisión/baja actividad de síntomas PsARC</td><td>CRITICAL</td><td>⊕⊕○○<br/>BAJA</td></tr> <tr> <td>Función evaluada con HAQ</td><td>CRITICAL</td><td>⊕⊕○○<br/>BAJA</td></tr> <tr> <td>Eventos adversos</td><td>CRITICAL</td><td>⊕⊕○○<br/>BAJA</td></tr> </table>                                                                                                                             | Desenlace                          | Importancia Relativa | Certeza de la evidencia (GRADE) | Control enfermedad por remisión/baja actividad de síntomas PsARC | CRITICAL | ⊕⊕○○<br>BAJA | Función evaluada con HAQ | CRITICAL | ⊕⊕○○<br>BAJA | Eventos adversos | CRITICAL | ⊕⊕○○<br>BAJA |  |
| Desenlace                                                                                                                                                                                                            | Importancia Relativa                                                                                                                                                                                                                                                                                                                                                                                                                                                                                                                                                                                                                                                                                                                                                                                                                                             | Certeza de la evidencia (GRADE)    |                      |                                 |                                                                  |          |              |                          |          |              |                  |          |              |  |
| Control enfermedad por remisión/baja actividad de síntomas PsARC                                                                                                                                                     | CRITICAL                                                                                                                                                                                                                                                                                                                                                                                                                                                                                                                                                                                                                                                                                                                                                                                                                                                         | ⊕⊕○○<br>BAJA                       |                      |                                 |                                                                  |          |              |                          |          |              |                  |          |              |  |
| Función evaluada con HAQ                                                                                                                                                                                             | CRITICAL                                                                                                                                                                                                                                                                                                                                                                                                                                                                                                                                                                                                                                                                                                                                                                                                                                                         | ⊕⊕○○<br>BAJA                       |                      |                                 |                                                                  |          |              |                          |          |              |                  |          |              |  |
| Eventos adversos                                                                                                                                                                                                     | CRITICAL                                                                                                                                                                                                                                                                                                                                                                                                                                                                                                                                                                                                                                                                                                                                                                                                                                                         | ⊕⊕○○<br>BAJA                       |                      |                                 |                                                                  |          |              |                          |          |              |                  |          |              |  |
| <b>Valores de los pacientes</b><br>¿Hay variación o poca certeza sobre cómo valoran las personas/los pacientes los desenlaces principales?                                                                           |                                                                                                                                                                                                                                                                                                                                                                                                                                                                                                                                                                                                                                                                                                                                                                                                                                                                  |                                    |                      |                                 |                                                                  |          |              |                          |          |              |                  |          |              |  |
| <b>JUICIO</b>                                                                                                                                                                                                        | <b>EVIDENCIA DE LA INVESTIGACION</b>                                                                                                                                                                                                                                                                                                                                                                                                                                                                                                                                                                                                                                                                                                                                                                                                                             | <b>CONSIDERACIONES ADICIONALES</b> |                      |                                 |                                                                  |          |              |                          |          |              |                  |          |              |  |
| <ul style="list-style-type: none"> <li>○ <b>Variabilidad o incertidumbre importante</b></li> <li>○ Posiblemente hay variabilidad o incertidumbre importante</li> <li>○ Posiblemente No hay variabilidad o</li> </ul> | <p>Se identificaron dos estudios el primero de Nota y cols 2014(11) que evalúa las percepciones y preferencias en los pacientes en la toma de decisiones sobre el inicio de tratamiento con DMARDS, este estudio se realizó por medio de una encuesta a 894 pacientes con diagnóstico de artritis reumatoidea, artritis psoriásica o espondilitis anquilosante, en esta encuesta se evaluó 4 puntos específicamente: Iniciar tratamiento con un DMARD, iniciar metotrexato inyectado, iniciar con un DMARD biológico y disminuir o suspender un DMARD estas preferencias se evaluaron con la escala de preferencia de control. La proporción de respuesta a las encuestas fue del 58%. Para todas las decisiones (59% a 63%) prefirieron la toma de decisiones compartidas, en general los pacientes desean tener mayor participación en la toma de decisión</p> |                                    |                      |                                 |                                                                  |          |              |                          |          |              |                  |          |              |  |

|                                                                                                                                                                                                                                   |                                                                                                                                                                                                                                                                                                                                                                                                                                                                                                                                                                                                                                                                                                                           |                                    |
|-----------------------------------------------------------------------------------------------------------------------------------------------------------------------------------------------------------------------------------|---------------------------------------------------------------------------------------------------------------------------------------------------------------------------------------------------------------------------------------------------------------------------------------------------------------------------------------------------------------------------------------------------------------------------------------------------------------------------------------------------------------------------------------------------------------------------------------------------------------------------------------------------------------------------------------------------------------------------|------------------------------------|
| incertidumbre importante<br>◦ No hay variabilidad o incertidumbre importante                                                                                                                                                      | en los 4 puntos, tener menor participación se reflejó en menor satisfacción con el tratamiento.<br><br>El Segundo estudio realizado por Pasma y cols en el 2014 (12) evaluó los factores asociados a la adherencia de los pacientes a los DMARDS por medio de grupos focales incluyendo un total del 33 pacientes con menos de dos años en tratamiento con DMARDS; dentro de lo relatado por los pacientes muchos refirieron una percepción negativa de los DMARDS por los efectos secundarios y un concepto inadecuado del medicamento como un “veneno” que estaba relacionado con experiencias previas negativas con los medicamentos, negación de la enfermedad y la experiencia negativa relatada por otras personas. |                                    |
| <b>Balance de los efectos</b><br>¿El balance entre los efectos deseables e indeseables favorece la opción o el comparador?                                                                                                        |                                                                                                                                                                                                                                                                                                                                                                                                                                                                                                                                                                                                                                                                                                                           |                                    |
| <b>JUICIO</b>                                                                                                                                                                                                                     | <b>EVIDENCIA DE LA INVESTIGACION</b>                                                                                                                                                                                                                                                                                                                                                                                                                                                                                                                                                                                                                                                                                      | <b>CONSIDERACIONES ADICIONALES</b> |
| ◦ Favorece al comparador<br>◦ Probablemente favorece al comparador<br>◦ No favorece al comparador ni a la opción en evaluación<br>◦ Probablemente favorece a la opción<br>◦ Favorece a la intervención<br>◦ Varía<br>◦ No se sabe | Se considera que el balance entre los efectos deseables e indeseables favorece el uso de la intervención.                                                                                                                                                                                                                                                                                                                                                                                                                                                                                                                                                                                                                 |                                    |

| Recursos requeridos<br>Que tan grande es el requerimiento de recursos (costos)?                                                                                                                                                              |                                                                                                                                                                                                                                                                                                                                                                                                                                                                                                                                                                                                                                                                                                                                                                                                                                                                                                                                                                                                                                                                                                                                                                                                                                                    |                                                                                                                                         |
|----------------------------------------------------------------------------------------------------------------------------------------------------------------------------------------------------------------------------------------------|----------------------------------------------------------------------------------------------------------------------------------------------------------------------------------------------------------------------------------------------------------------------------------------------------------------------------------------------------------------------------------------------------------------------------------------------------------------------------------------------------------------------------------------------------------------------------------------------------------------------------------------------------------------------------------------------------------------------------------------------------------------------------------------------------------------------------------------------------------------------------------------------------------------------------------------------------------------------------------------------------------------------------------------------------------------------------------------------------------------------------------------------------------------------------------------------------------------------------------------------------|-----------------------------------------------------------------------------------------------------------------------------------------|
| JUICIO                                                                                                                                                                                                                                       | EVIDENCIA DE LA INVESTIGACION                                                                                                                                                                                                                                                                                                                                                                                                                                                                                                                                                                                                                                                                                                                                                                                                                                                                                                                                                                                                                                                                                                                                                                                                                      | CONSIDERACIONES ADICIONALES                                                                                                             |
| <ul style="list-style-type: none"> <li>○ Grandes costos</li> <li>○ Costos moderados</li> <li>○ no significantes costos ni ahorros</li> <li>○ Moderados ahorros</li> <li>○ Grandes ahorros</li> <li>○ Varían</li> <li>○ No se sabe</li> </ul> | <p>Se identificó una revisión sistemática de la evidencia económica, realizada por D'Angiolella y cols en el 2018(13) que evaluó costos de la enfermedad en pacientes con artritis psoriásica y costo-efectividad de las diferentes intervenciones para artritis psoriásica, incluyó siete estudios de costo efectividad y dos estudios de costo utilidad.</p> <p>Los autores concluyen que los costos de los DMARDS biológicos son muy elevados sin embargo son medicamentos efectivos lo que resulta como una medida costo efectiva. En pacientes con un DMARD previo cetolizumab pegol, fue el tratamiento óptimo en los pacientes con artritis psoriásica moderada a severa reportando un ICER de £20,870 comparado con el mejor tratamiento de soporte que incluye el uso convencional de DMARDS. En pacientes con artritis psoriásica leve secukinumab fue el tratamiento óptimo con un ICERs en un rango de £21,772 a £23,928. En los pacientes naïve de biológico con dos o más DMARDS etanercept fue el tratamiento con el ICER más favorable £20,000 - 30,000/QALY.</p> <p>La calidad de los estudios de la revisión es moderada ya que en algunos estudios no se tuvo en cuenta la incertidumbre en los costos y las consecuencias.</p> | <p>No hay información local para Colombia del impacto económico del uso de estas intervenciones en pacientes con espondiloartritis.</p> |

| Equidad<br>¿La implementación de la opción, tendrá impacto en la equidad?                                                                                                                                         |                                                                                                       |                                                                                                                                                                                                        |
|-------------------------------------------------------------------------------------------------------------------------------------------------------------------------------------------------------------------|-------------------------------------------------------------------------------------------------------|--------------------------------------------------------------------------------------------------------------------------------------------------------------------------------------------------------|
| JUICIO                                                                                                                                                                                                            | EVIDENCIA DE LA INVESTIGACION                                                                         | CONSIDERACIONES ADICIONALES                                                                                                                                                                            |
| <ul style="list-style-type: none"> <li>○ Reduce</li> <li>○ Probablemente se reduce la equidad</li> <li>○ Probablemente no impacta la equidad</li> <li>○ Probablemente incrementa</li> <li>○ Incrementa</li> </ul> | <p>Los estudios encontrados no evalúan el impacto de estas intervenciones en la equidad en salud.</p> | <p>No se anticipa un impacto en la equidad, dada la actual disponibilidad de los DMARDS convencionales en el país y su inclusión como medicamentos esenciales en los planes de cobertura en salud.</p> |

|                                                                                                                                                                     |                                                                                                                                  |                                                                                                                                                                                                                                                                                                                        |
|---------------------------------------------------------------------------------------------------------------------------------------------------------------------|----------------------------------------------------------------------------------------------------------------------------------|------------------------------------------------------------------------------------------------------------------------------------------------------------------------------------------------------------------------------------------------------------------------------------------------------------------------|
| <ul style="list-style-type: none"> <li>○ Varia</li> <li>○ No se sabe</li> </ul>                                                                                     |                                                                                                                                  |                                                                                                                                                                                                                                                                                                                        |
| <b>Aceptabilidad</b><br>¿Es la opción aceptada por los diferentes actores involucrados en su implementación?                                                        |                                                                                                                                  |                                                                                                                                                                                                                                                                                                                        |
| <b>JUICIO</b>                                                                                                                                                       | <b>EVIDENCIA DE LA INVESTIGACION</b>                                                                                             | <b>CONSIDERACIONES ADICIONALES</b>                                                                                                                                                                                                                                                                                     |
| <ul style="list-style-type: none"> <li>○ No</li> <li>○ Probablemente no</li> <li>○ Probablemente si</li> <li>○ Si</li> <li>○ Varia</li> <li>○ No se sabe</li> </ul> | No hay estudios que hayan evaluado la aceptabilidad del uso estas terapias en el tratamiento de pacientes con espondiloartritis. | La guía EULAR recomienda como primera elección para el tratamiento de la artritis en pacientes con artritis psoriásica el uso de un DMARD convencional preferiblemente metotrexato, con lo cual se prevé que la recomendación será bien aceptada por los clinico sy demas implicados en el ciudado de esto spacientes. |

| Factibilidad<br>¿Es la opción factible de IMPLEMENTAR?                                                                                                                                           |                                             |                                                                                                                                                                                        |
|--------------------------------------------------------------------------------------------------------------------------------------------------------------------------------------------------|---------------------------------------------|----------------------------------------------------------------------------------------------------------------------------------------------------------------------------------------|
| JUICIO                                                                                                                                                                                           | EVIDENCIA DE LA INVESTIGACION               | CONSIDERACIONES ADICIONALES                                                                                                                                                            |
| No<br><input type="radio"/> Probablemente no<br><input type="radio"/> Probablemente si<br><input type="radio"/> Si<br><input type="radio"/> Varia<br><input checked="" type="radio"/> No se sabe | No se encontraron estudios de factibilidad. | Se considera factible ya que los medicamentos están disponibles en el país y cuentan con licencia INVIMA. Se debe evaluar las condiciones de cobertura de los medicamentos biológicos. |

## Resumen de Juicios

|                         | JUICIOS                                 |                                                      |                                                          |                                            |  |       |                     |
|-------------------------|-----------------------------------------|------------------------------------------------------|----------------------------------------------------------|--------------------------------------------|--|-------|---------------------|
| PROBLEMA                | No                                      | Probablemente no                                     | Probablemente si                                         | Si                                         |  | Varia | No se sabe          |
| EFFECTOS DESEABLES      | Triviales                               | Pequeños                                             | Moderados                                                | Grandes                                    |  | Varia | No se sabe          |
| EFFECTOS INDESEABLES    | Grandes                                 | Moderados                                            | Pequeños                                                 | Triviales                                  |  | Varia | No se sabe          |
| CERTEZA EN LA EVIDENCIA | Muy Baja                                | Baja                                                 | Moderada                                                 | Alta                                       |  |       | No incluyó estudios |
| VALORES DE PACIENTES    | Importante incertidumbre o variabilidad | Posiblemente Importante incertidumbre o variabilidad | Probablemente No Importante incertidumbre o variabilidad | No Importante incertidumbre o variabilidad |  |       |                     |

|                               |                        |                                      |                                                 |                                        |                          |       |            |
|-------------------------------|------------------------|--------------------------------------|-------------------------------------------------|----------------------------------------|--------------------------|-------|------------|
| <b>BALANCE DE LOS EFECTOS</b> | Favorece el comparador | Probablemente Favorece el comparador | No favorece Ni la intervención ni el comparador | Probablemente favorece la intervención | Favorece la intervención | Varia | No se sabe |
| <b>RECURSOS REQUERIDOS</b>    | Grandes costos         | Moderados costos                     | Costos y ahorros insignificantes                | Moderados ahorros                      | Grandes ahorros          | Varia | No se sabe |
| <b>EQUIDAD</b>                | Reducida               | Probablemente reducida               | Probablemente no impactada                      | Probablemente incrementada             | Incrementada             | Varia | No se sabe |
| <b>ACEPTABILIDAD</b>          | No                     | Probablemente No                     | Probablemente Si                                | Si                                     |                          | Varia | No se sabe |
| <b>FACTIBILIDAD</b>           | No                     | Probablemente No                     | Probablemente Si                                | Si                                     |                          | Varia | No se sabe |

### Tipo de Recomendación

|                                                  |                                                       |                                                                                |                                                     |                                                |
|--------------------------------------------------|-------------------------------------------------------|--------------------------------------------------------------------------------|-----------------------------------------------------|------------------------------------------------|
| Recomendación fuerte en contra de la opción<br>○ | Recomendación condicional en contra de la opción<br>○ | Recomendación condicional a favor de cualquiera la opción o su comparador<br>○ | Recomendación condicional a favor de la opción<br>○ | Recomendación fuerte a favor de la opción<br>○ |
|--------------------------------------------------|-------------------------------------------------------|--------------------------------------------------------------------------------|-----------------------------------------------------|------------------------------------------------|

### Conclusiones

#### Recomendación

En pacientes con EspAp se sugiere usar como primera línea el tratamiento con DMARDs convencionales (metotrexato, sulfasalazina).  
Recomendación condicional a favor de la intervención. Certeza de la evidencia baja.

#### Justificación

El panel considera que el balance de los efectos favorece a la intervención con DMARDs convencionales, dada la evidencia sobre la mejoría de los pacientes y las no diferencias en cuanto a eventos adversos al compararlos con el placebo.

#### Consideraciones por subgrupos

En pacientes con artritis psoriásica se sugiere como primera línea el tratamiento con Metrotexato. Recomendación condicional a favor de la intervención. Certeza de la evidencia baja

## Pregunta 1: Tabla de resumen de hallazgos GRADE

Referencia: Wilsdon TD, Whittle SL, Thynne TR, Mangoni AA. Methotrexate for psoriatic arthritis. Cochrane Database Syst Rev. 2019;1(1):Cd012722.

Patient or population: psoriatic arthritis

Setting: rheumatology clinics (outpatient setting)

Intervention: methotrexate (oral  $\leq 15$  mg per week)

Comparison: placebo

| Quality assessment                                                                                      |                   |              |                                 |                         |                     |                      | No of patients | Effect         |                              |                                                                                                                                                   | Quality                     | Importance |
|---------------------------------------------------------------------------------------------------------|-------------------|--------------|---------------------------------|-------------------------|---------------------|----------------------|----------------|----------------|------------------------------|---------------------------------------------------------------------------------------------------------------------------------------------------|-----------------------------|------------|
| No of studies                                                                                           | Design            | Risk of bias | Inconsistency (I <sup>2</sup> ) | Indirectness            | Imprecision         | Other considerations | Any PT         | Control: No PT | Relative (95% CI)            | Absolute                                                                                                                                          |                             |            |
| Control de la enfermedad: PsARC (tiempo promedio de seguimiento 6 meses)                                |                   |              |                                 |                         |                     |                      |                |                |                              |                                                                                                                                                   |                             |            |
| 1                                                                                                       | randomized trials | serious      | no serious inconsistency        | no serious indirectness | serious imprecision | none                 | 109            | 112            | RR 1,76 (IC 95% 1,14 a 2,70) | -.                                                                                                                                                | ⊕⊕00<br>BAJA <sup>a,b</sup> | CRITICAL   |
| Funcionalidad: HAQ-DI (tiempo promedio de seguimiento 6 meses; valores más bajos indican mejor control) |                   |              |                                 |                         |                     |                      |                |                |                              |                                                                                                                                                   |                             |            |
| 1                                                                                                       | randomized trials | serious      | no serious inconsistency        | no serious indirectness | serious imprecision | none                 | 109            | 112            | -                            | Absolute change - 10% better with methotrexate (3% better to 17% better); relative change - 30% with methotrexate (95% CI 9% to 51% improvement)d | ⊕⊕00<br>BAJA <sup>a,b</sup> | CRITICAL   |
| Eventos adversos                                                                                        |                   |              |                                 |                         |                     |                      |                |                |                              |                                                                                                                                                   |                             |            |
| 3                                                                                                       | randomized trials | serious      | no serious inconsistency        | no serious indirectness | serious imprecision | none                 | 141            | 152            | 1.32 (95% CI 0.51 to 3.42;   | 0.02 (95% CI -0.04 to 0.07)                                                                                                                       | ⊕⊕00<br>BAJA <sup>a,b</sup> | CRITICAL   |

<sup>a</sup>-Downgraded due to risk of bias: judged as unclear or high risk in at least one study; <sup>b</sup>-Downgraded due to imprecision: low numbers of events with confidence intervals including potentially clinically meaningless benefit; <sup>c</sup>-Study authors did not report summary data from the ITT population. We assumed that missing participants had no response and we calculated the ITT analysis using the number randomized; <sup>d</sup>-Relative changes calculated as absolute change (mean difference) divided by mean at baseline in the placebo group (values were 1.0 on 0 to 3 HAQ; 4.06 on 0 to 10 DAS28-ESR).



## Referencias:

1. Kroon F, Landewe R, Dougados M, van der Heijde D. Continuous NSAID use reverts the effects of inflammation on radiographic progression in patients with ankylosing spondylitis. *Ann Rheum Dis*. 2012;71(10):1623-9.
2. Molto A, Sieper J. Peripheral spondyloarthritis: Concept, diagnosis and treatment. *Best practice & research Clinical rheumatology*. 2018;32(3):357-68.
3. van der Heijde D, Ramiro S, Landewe R, Baraliakos X, Van den Bosch F, Sepriano A, et al. 2016 update of the ASAS-EULAR management recommendations for axial spondyloarthritis. *Ann Rheum Dis*. 2017;76(6):978-91.
4. Gossec L, Smolen JS, Ramiro S, de Wit M, Cutolo M, Dougados M, et al. European League Against Rheumatism (EULAR) recommendations for the management of psoriatic arthritis with pharmacological therapies: 2015 update. *Ann Rheum Dis*. 2016;75(3):499-510.
5. Ruhoff JT, Horn HC, Ellingsen T. Efficacy of methotrexate in management of peripheral psoriatic arthritis - a systematic review. *Danish medical journal*. 2019;66(10).
6. Nash P, Clegg DO. Psoriatic arthritis therapy: NSAIDs and traditional DMARDs. 2005;64(suppl 2):ii74-ii7.
7. López-Medina C, Moltó A, Dougados M. FRI0189 Peripheral manifestations in spondyloarthritis: impact on patient-reported outcomes (PROS) and treatment. data from asas-comospa. 2018;77(Suppl 2):635-.
8. Dougados M, Boumier P, Amor B. Sulphasalazine in ankylosing spondylitis: a double blind controlled study in 60 patients. 1986;293(6552):911-4.
9. Dressler C, Eisert L, Pham PA, Nast A. Efficacy and safety of systemic treatments in psoriatic arthritis: a systematic review, meta-analysis and GRADE evaluation. *Journal of the European Academy of Dermatology and Venereology : JEADV*. 2019;33(7):1249-60.
10. Wilsdon TD, Whittle SL, Thynne TR, Mangoni AA. Methotrexate for psoriatic arthritis. *Cochrane Database Syst Rev*. 2019;1(1):Cd012722.
11. Nota I, Drossaert CHC, Taal E, Vonkeman HE, van de Laar MAFJ. Patient participation in decisions about disease modifying anti-rheumatic drugs: a cross-sectional survey. *BMC Musculoskeletal Disorders*. 2014;15(1):333.
12. Pasma A, van 't Spijker A, Luime JJ, Walter MJ, Busschbach JJ, Hazes JM. Facilitators and barriers to adherence in the initiation phase of Disease-modifying Antirheumatic Drug (DMARD) use in patients with arthritis who recently started their first DMARD treatment. *The Journal of rheumatology*. 2015;42(3):379-85.
13. D'Angiolella LS, Cortesi PA, Lafranconi A, Micale M, Mangano S, Cesana G, et al. Cost and Cost Effectiveness of Treatments for Psoriatic Arthritis: A Systematic Literature Review. *PharmacoEconomics*. 2018;36(5):567-89.

## GPC para pacientes con Espondiloartritis Periférica ASOREUMA

**Pregunta 2: ¿En pacientes adultos con Espondiloartritis Periférica se debe usar Glucocorticoides (locales o sistémicos) dada su efectividad en el control de la enfermedad y perfil de seguridad?**

|                     |                                                         |         |
|---------------------|---------------------------------------------------------|---------|
| <b>Población</b>    | Pacientes adultos con espondiloartritis Periférica      |         |
| <b>Intervención</b> | Medicamentos glucocorticoides locales o sistémicos      |         |
| <b>Comparación</b>  | No usarlo                                               |         |
| <b>Desenlaces</b>   | Control enfermedad- Remisión/baja actividad de síntomas | Crítico |
|                     | Control enfermedad- Mejoría en escalas de funcionalidad | Crítico |
|                     | Control enfermedad- progresión radiográfica             | Crítico |
|                     | calidad de vida                                         | Crítico |
|                     | Perfil de seguridad: Eventos adversos                   | Crítico |

### Antecedentes

La Espondiloartritis es un grupo de condiciones inflamatorias interrelacionadas que comparten características clínicas, patogénicas, genéticas, radiográficas, epidemiológicas y de respuesta terapéutica. Las espondiloartritis pueden ser predominantemente axiales o periféricas.

Axial:

- Espondiloartritis Axial radiográfica (Espondilitis anquilosante -EA)
- Espondiloartritis Axial No radiográfica (EspAAx-nr)

Periférica (EspAp):

- Artritis psoriásica (APs)
- Artritis reactiva
- Espondiloartritis enteropática.

Las personas con espondiloartritis predominantemente Axial, pueden tener adicionalmente síntomas periféricos y viceversa.

La APs es una enfermedad inflamatoria crónica del sistema musculoesquelético, generalmente asociada a psoriasis, que puede afectar a las articulaciones periféricas, las del esqueleto axial (columna vertebral y sacroilíacas), las entesis (sitios de inserción de ligamentos al hueso), vainas tendinosas (dactilitis), piel, uñas y otros

## GPC para pacientes con Espondiloartritis Periférica ASOREUMA

órganos (intestino, ojo). Sus variadas formas de presentación y de manifestaciones tanto musculoesqueléticas como cutáneas hacen que su manejo sea más complejo y necesite la colaboración de varios especialistas, fundamentalmente reumatólogos y dermatólogos (1) (2) Los criterios de clasificación para Artritis Psoriásica CASPAR fueron publicados en 2006 (3).

## Evidencia

Kemal NAS et al 2018 (4) realizaron una RSL "Management of Psoriatic Arthritis: Turkish League Against Rheumatism (TLAR) Expert Opinions". Dentro de sus recomendaciones, mencionan que las inyecciones locales con glucocorticoides podrían ser consideradas como parte del tratamiento en pacientes que tengan artritis psoriásica con artritis periférica, dactilitis y entesis. Los glucocorticoides sistémicos deben ser utilizados con precaución a la dosis más baja posible. Las inyecciones intraarticulares de glucocorticoides son efectivas para el tratamiento de la artritis psoriásica (5). Los glucocorticoides locales o sistémicos pueden tener algunos efectos benéficos en pacientes con dactilitis y entesis (6)(7)(5). No hay datos de ECAS que hayan investigado el uso sistémico de glucocorticoides en artritis psoriásica. Los Dermatólogos evitan el uso sistémico de glucocorticoides debido a su potencial efecto adverso sobre las lesiones dérmicas de la psoriasis y la rápida exacerbación de las lesiones dérmicas luego de suspender los glucocorticoides. (8)(9). En una evaluación retrospectiva de 104 pacientes, el 38% tenía antecedente de uso de glucocorticoides sistémicos antes del inicio de una psoriasis pustular y al menos 1/3 de estos casos fueron precipitados por la suspensión de la terapia con glucocorticoides. (8). Erupciones de las lesiones de la piel después de suspender los glucocorticoides no ha sido confirmado con evidencia en la práctica reumatológica; sin embargo, su uso por largos periodos de glucocorticoides sistémicos debería ser evitado por sus potenciales eventos adversos (10). Los glucocorticoides sistémicos son ampliamente utilizados a bajas dosis en pacientes con artritis psoriásica en las clínicas de reumatología. (11). El uso de glucocorticoides parecería ser útil al menos para algunos pacientes con artritis psoriásica. (12). Los glucocorticoides locales o sistémicos son recomendados para la artritis psoriásica por EULAR y GRAPPA a bajas dosis y por cortos periodos de tiempo de modo que se reduzca el riesgo de eventos adversos.

La RSL de L Gossec et al 2015 (6) que sirvió para actualizar las recomendaciones de la European League Against Rheumatism (EULAR) para el manejo farmacológico de la artritis psoriásica, indica que las inyecciones locales de glucocorticoides deberían ser consideradas como una terapia adyuvante en pacientes con APs (nivel de evidencia 3b, grado de recomendación C). Los glucocorticoides sistémicos deben ser usados con precaución y a la dosis efectiva más baja (nivel de evidencia 4, grado de recomendación C). Esta recomendación no cambió con respecto a la guía anterior. Dado que no hay evidencia acumulada desde la última actualización de la guía, se

## GPC para pacientes con Espondiloartritis Periférica ASOREUMA

reitera que los glucocorticoides intraarticulares pueden tener un lugar en el tratamiento de pacientes con APs, en particular en pacientes con monoartritis/oligoartritis. (5) Las inyecciones de glucocorticoides pueden también ser útiles en dactilitis (inyecciones en la vaina del tendón) y en la entesis, por ejemplo, en el codo o en la bursa retrocalcánea en la entesis de Aquiles. El ultrasonido puede ayudar a guiar estas inyecciones si es necesario. El temor a la reactivación de la psoriasis por el uso de glucocorticoides en el entorno de la reumatología no está justificado por la evidencia, pero se debe evitar el uso a largo plazo de glucocorticoides sistémicos en función de los riesgos significativos de eventos adversos. En particular, el perfil de eventos adversos de la terapia con glucocorticoides a largo plazo debe tenerse en cuenta al iniciar y especialmente continuar con los glucocorticoides orales. (13) (10).

La RSL de Ash 2012 (14) "A systematic literature review of drug therapies for the treatment of psoriatic arthritis: current evidence and meta-analysis informing the EULAR recommendations for the management of psoriatic arthritis" encontró que de 5557 artículos publicados, 38 cumplían con el criterio de inclusión y otros 3 artículos se encontraron por búsqueda manual. Ninguno de estos fue un ECA. A pesar de las preocupaciones sobre la seguridad de los glucocorticoides sistémicos en pacientes con psoriasis, ellos parecen ser ampliamente utilizados.

La revisión narrativa de Fendler 2011(12) "Glucocorticoid treatment in spondyloarthritis" no encontró ECAs sobre el uso de glucocorticoides sistémicos en artritis psoriásica. En opinión de expertos dermatólogos, se recomienda evitar el uso sistémico de glucocorticoides dado el empeoramiento al suspenderlos y los efectos negativos sobre las placas psoriásicas durante su uso. Sin embargo, muchos reumatólogos usan bajas dosis de prednisona para tratar la artritis psoriásica con beneficios clínicos. En pacientes con dactilitis, y entesis, altas dosis de glucocorticoides dadas sistémica o localmente han mostrado algún efecto (15)(16)

Para la artritis reactiva, tampoco hay ECAs que soporten el uso de glucocorticoides. En un reporte basado solo en opinión de expertos, el uso de glucocorticoides ha sido recomendado para pacientes con artritis reactiva pero solo cuando están severamente afectados (17).

Para el tratamiento con glucocorticoides de pacientes con artritis asociada a enfermedad inflamatorio del intestino, tampoco se encontraron ECAs. Sin embargo, la experiencia clínica muestra que los síntomas articulares mejoran después del tratamiento de la enfermedad gastrointestinal con glucocorticoides. (18)

El estudio de Lihi Elder 2010 (5) "Predictors of response to intra-articular steroid injection in psoriatic arthritis" es una cohorte de 220 pacientes a quienes se les realizó un total de 245 inyecciones intraarticulares de glucocorticoides. El estudio mostró

## GPC para pacientes con Espondiloartritis Periférica ASOREUMA

una respuesta clínica a los 3 meses del 46.6% de las articulaciones inyectadas. En los 12 meses siguientes a la inyección, el 25,5% de las articulaciones recayeron. Los factores clínicos que estuvieron asociados con una respuesta incluyeron, la duración de la psoriasis [Odds ratio (OR) 1.03] y el uso de MTX o agentes anti-TNF al momento de la inyección (OR 2.68). Los factores que estuvieron asociados con recaída incluyeron inyecciones en grandes articulaciones (OR 4.58) y una sedimentación elevada (OR 15.0), mientras que la ausencia de daño clínico y/o radiológico (OR 0.23) y la duración de la APs (OR 0.92) redujeron el riesgo de recaída. Concluyen que las inyecciones intraarticulares son efectivas para tratar la artritis psoriásica.

La RSL de Soriano 2006 (19) "Therapies for Peripheral Joint Disease in Psoriatic Arthritis. A Systematic Review" no encontró ECAs que evaluaran el uso sistémico de glucocorticoides. En "opinión de los expertos", el uso de glucocorticoides sistémicos está contraindicado en el tratamiento de la psoriasis y son aconsejables solo bajo circunstancias especiales y nunca usarlos de manera crónica. Tampoco hay ECAs que evalúen el uso de glucocorticoides intra articulares en artritis psoriásica. La opinión de los expertos es que las inyecciones intra articulares de glucocorticoides pueden administrarse para tratar la mono u oligoartritis persistente, a menudo con buenos resultados clínicos (15) teniendo cuidado de evitar aplicar la inyección en articulaciones que estén rodeadas de placas psoriásicas.

### Preferencia de pacientes

Se realizó una búsqueda específica para identificar estudios de preferencias de pacientes. No se identificaron estudios de preferencias o calidad de vida específicos en pacientes con EspAp que reciben glucocorticoides.

Estudios observacionales de efectos adversos graves de GC (EA) identifican fracturas y toxicidad ocular como una de las más prevalentes. Sin embargo, los pacientes a menudo se preocupan más por los efectos menos graves, aunque más aparentes. Secuelas como facies cushinoides, adelgazamiento de la piel, y equimosis muestran un impacto importante en su calidad de vida. (20)

Como evidencia indirecta se identificó un estudio conducido por Robson en 2018 sobre las percepciones de los pacientes tratados con glucocorticoides por vasculitis asociada a anticuerpos citoplasmáticos (21). Este estudio incluyó 50 pacientes reclutados de tres centros de reumatología del Reino Unido, Estados Unidos y Canadá. Los pacientes fueron seleccionados intencionalmente con el fin de incluir las enfermedades reumáticas de interés; entre los criterios de selección se tuvieron en cuenta la cronicidad de la enfermedad (diagnóstico <2 años antes de la inscripción o > 2 años), edad y sexo, y afectación de órganos. Las entrevistas fueron realizadas por investigadores con experiencia en investigación cualitativa. Las entrevistas continuaron hasta que se obtuvo "saturación de datos" y para satisfacer el marco de

## GPC para pacientes con Espondiloartritis Periférica ASOREUMA

muestreo. Del total de entrevistas surgieron cuarenta temas individuales relacionados con la terapia con glucocorticoides, estos fueron agrupados en 13 categorías y tres temas generales: a) Los glucocorticoides son efectivos y la abstinencia puede potenciar una tarifa de AAV, b) saliente emocional, física y social efectos de la terapia con glucocorticoides y c) equilibrar los pros y contras de los glucocorticoides.

Como resultados globales de este estudio se destacan: Los pacientes valoran el beneficio que obtienen en el control de la enfermedad con el tratamiento con corticoides, sin embargo, muestran gran preocupación por el tiempo en que podrán permanecer recibiendo este tratamiento en forma segura ya que son conscientes de los riesgos del tratamiento a largo plazo. Entre las manifestaciones que los pacientes relacionan con el uso de corticoides se identificaron: niveles anormales de energía que afecta sus patrones de sueño (menos tiempo de sueño); depresión, ansiedad e irritabilidad; sensación de hambre y aumento del apetito que resulta en cambio en la apariencia y aumento de peso con glucocorticoides, fragilidad de la piel: sangrado fácil y debilidad muscular particularmente falta de fuerza en la piernas y brazos. Otros eventos adversos físicos informados incluyeron un nuevo inicio o empeoramiento de la diabetes mellitus. Entre las principales preocupaciones de los pacientes, está el tener que suspender los GC y que su enfermedad progrese o deje de estar controlada.

A pesar de que los autores muestran que el balance entre la efectividad del tratamiento y la preocupación por los efectos adversos a lo largo del tiempo muestra en general un equilibrio, el estudio deja claro que el tratamiento con glucocorticoides impacta en forma importante la calidad de vida de quienes los reciben. Para los pacientes, el aumento de peso significativo y el cambio en la apariencia, lleva a una pérdida de sentido de sí mismo, cambios negativos en el comportamiento de las personas que los rodean y luego un estado de ánimo bajo. La irritabilidad e ira secundarias a los glucocorticoides también se destacaron como reacciones que impactan su calidad de vida respecto a las relaciones con familiares y compañeros de trabajo. La fatiga es otro aspecto importante del deterioro en la calidad de vida, ya que se asocia con una serie de factores biopsicológicos, incluidos los trastornos del sueño, fue claro el enlace entre altas dosis de glucocorticoides e insomnio. No se encontró una diferencia general en la calidad de vida entre los cónyuges de aquellos llama la atención que, en este estudio, otros factores potenciales, por ejemplo, infección o enfermedad cardiovascular no se informaron, posiblemente porque no fueron experimentadas por los pacientes dentro la muestra, o los pacientes no atribuyeron estas complicaciones a los glucocorticoides. es uno de los aspectos que requieren más atención por parte de los médicos tratantes.

## Recursos requeridos y costos

La búsqueda específica de análisis económicos en pacientes con EspAp y uso de glucocorticoides, no arrojó ningún estudio que respondiera esta pregunta. Se conoce que los costos de atención médica asociados con los glucocorticoides incluyen tanto los debidos al precio de compra como los derivados de sus posibles eventos adversos. Por lo tanto, a pesar del bajo precio de los glucocorticoides en comparación con otras terapias para EspAp, los costos iatrogénicos podrían ser un componente significativo del costo total del tratamiento con estos medicamentos.

Se identificó un análisis económico (22) sobre el costo de los eventos adversos asociados a los glucocorticoides que se considera evidencia indirecta para esta pregunta por ser desarrollado en una cohorte hipotética de pacientes con artritis reumatoidea. Sin embargo, aporta información sobre el impacto económico de eventos adversos a la terapia con GC que pueden ser extrapolables a EspA. Los autores desarrollaron un modelo analítico de decisión que comparó los costos de atención médica en usuarios y no usuarios de glucocorticoides. En el modelo de Markov, los pacientes comenzaron en el estado sin eventos adversos (NOEA) y en cada ciclo podrían pasar al estado de hipertensión (HTA), al estado de diabetes (DM), al estado de fractura (FRAC) o al estado de muerte (MUERTE). En cualquiera de los estados de salud, los pacientes también podrían adquirir una complicación gastrointestinal, una catarata, una infección grave como neumonía e infección del tracto urinario, un infarto de miocardio o un accidente cerebrovascular; estos eventos duraron solo un ciclo. Los pacientes también podrían transición al estado de MUERTE después de un IM, un derrame cerebral, una fractura de cadera o una complicación gastrointestinal. Los resultados se reportan en dólares americanos a valor de 2009. Dada la poca transferibilidad de los valores obtenidos respecto a los costos percé entre países (diferentes jurisdicciones) y cambios en el valor monetario a través del tiempo, aquí se destacan los resultados de este análisis que pueden aportar información relevante para la toma de decisiones respecto al potencial impacto económico de la terapia en presencia de eventos adversos serios.

Los eventos adversos que tuvieron un mayor impacto en los costos fueron complicaciones gastrointestinales y neumonía. En el modelo sin IM y accidente cerebrovascular, la diferencia en los costos entre usuarios de GC y no usuarios, fue menor cuando no se consideraron las complicaciones gastrointestinales, mientras que en el modelo con estos eventos cardiovasculares la diferencia fue menor cuando no se incluyó el IM. En comparación con la línea de base, excluir la neumonía redujo a la mitad el número de muertes entre los usuarios de GC en ambos modelos con y sin IM y accidente cerebrovascular. El impacto de la hipertensión y la diabetes fue modesto en los costos, y no tuvo ningún efecto sobre la cantidad de muertes a pesar de que las personas tenían mayores riesgos de infarto de miocardio y accidente cerebrovascular

## GPC para pacientes con Espondiloartritis Periférica ASOREUMA

cuando estaban en estos estados crónicos. Los costos totales de usuarios y no usuarios de GC, así como la diferencia en estos costos, aumentaron casi linealmente con aumentos en los costos unitarios de atención médica. Si el modelo se ejecuta durante 10 años en lugar de 2 años, los costos de los usuarios de GC sería mayores que los que no son usuarios, alrededor de 5.9 y 5.1 veces los mismos costos para el período de 2 años. La diferencia en los costos fue de alrededor del 50% y 67% más bajo que en el caso donde ocurrieron los eventos adversos gastrointestinales al comienzo del período en el modelo sin y con MI y accidente cerebrovascular, respectivamente.

## Pregunta 2: Marco de trabajo –De la evidencia a las decisiones

| <b>PREGUNTA</b>               |                                                                                                                                            |
|-------------------------------|--------------------------------------------------------------------------------------------------------------------------------------------|
| <b>POBLACION</b>              | <i>Pacientes adultos con espondiloartritis Periférica</i>                                                                                  |
| <b>INTERVENCIÓN</b>           | <i>Glucocorticoides sistémicos y locales</i>                                                                                               |
| <b>COMPARACIÓN</b>            | <i>Placebo</i>                                                                                                                             |
| <b>DESENLACES PRINCIPALES</b> | <i>Control de enfermedad /remisión/baja actividad de síntomas<br/>Mejoría de escalas de funcionalidad<br/>Seguridad (eventos adversos)</i> |
| <b>ÁMBITO</b>                 | <i>Ambulatorio y hospitalario</i>                                                                                                          |
| <b>PERSPECTIVA</b>            | <i>Recomendación de GPC en el contexto de espondiloartritis</i>                                                                            |
| <b>CONFLICTO DE INTERÉS:</b>  | <i>No hay ninguna declaración de conflictos de interés</i>                                                                                 |

## Evaluación

| <b>Problema</b><br>Es el problema una prioridad?                                                                                                                            |                                                                                                                                                                                                                                                                                                                                                                                                                                                                                                                                                                                                                                                                                                                                                                                                                                                                                                                                                                                                                                                                                                                                                      |                                    |
|-----------------------------------------------------------------------------------------------------------------------------------------------------------------------------|------------------------------------------------------------------------------------------------------------------------------------------------------------------------------------------------------------------------------------------------------------------------------------------------------------------------------------------------------------------------------------------------------------------------------------------------------------------------------------------------------------------------------------------------------------------------------------------------------------------------------------------------------------------------------------------------------------------------------------------------------------------------------------------------------------------------------------------------------------------------------------------------------------------------------------------------------------------------------------------------------------------------------------------------------------------------------------------------------------------------------------------------------|------------------------------------|
| <b>JUICIO</b>                                                                                                                                                               | <b>EVIDENCIA DE LA INVESTIGACION</b>                                                                                                                                                                                                                                                                                                                                                                                                                                                                                                                                                                                                                                                                                                                                                                                                                                                                                                                                                                                                                                                                                                                 | <b>CONSIDERACIONES ADICIONALES</b> |
| <ul style="list-style-type: none"> <li>○ No</li> <li>○ Probablemente No</li> <li>○ Probablemente Si</li> <li>○ Si</li> <li>○ Es variable</li> <li>○ No se conoce</li> </ul> | <p>SI es una prioridad, ya que en ausencia de un diagnóstico temprano y un tratamiento oportuno, la carga de la enfermedad puede generar un impacto funcional asociado a discapacidad, pérdida laboral, con secuelas no solo funcionales de tipo articular sino psicológicas, llevando a un deterioro en la calidad de vida.</p> <p>La APs es una enfermedad inflamatoria crónica del sistema musculoesquelético, generalmente asociada a psoriasis, que puede afectar a las articulaciones periféricas, las del esqueleto axial (columna vertebral y sacroilíacas), las entesis (sitios de inserción de ligamentos al hueso), vainas tendinosas (dactilitis), piel, uñas y otros órganos (intestino, ojo). Su heterogeneidad clínica y la ausencia de criterios de clasificación hasta hace unos años, ha dificultado la realización de estudios epidemiológicos y ensayos clínicos específicos. Sus variadas formas de presentación y de manifestaciones tanto musculoesqueléticas como cutáneas hacen que su manejo sea más complejo y necesite la colaboración de varios especialistas, fundamentalmente reumatólogos y dermatólogos (1) (2)</p> |                                    |

| Efectos deseables (beneficios de la opción a recomendar)<br>¿Qué tan sustanciales son los efectos deseables de la opción?                                         |                                                                                                                                                                                                                                                                                                                                                                                                                                                                                                                                                                                                                                                                                                                                                                                                                                                                                                                                                                                                                                                                                                                                                                                                                                                                                                                                                                                                                                                                                                                                                                                                                                                                                                                                                                                                                                                                                                                                                                                                                                                                                                                                                                                                                                                                                                                                                                                                                                                                                                                                                                                                                                                                                                                                                                  |                             |
|-------------------------------------------------------------------------------------------------------------------------------------------------------------------|------------------------------------------------------------------------------------------------------------------------------------------------------------------------------------------------------------------------------------------------------------------------------------------------------------------------------------------------------------------------------------------------------------------------------------------------------------------------------------------------------------------------------------------------------------------------------------------------------------------------------------------------------------------------------------------------------------------------------------------------------------------------------------------------------------------------------------------------------------------------------------------------------------------------------------------------------------------------------------------------------------------------------------------------------------------------------------------------------------------------------------------------------------------------------------------------------------------------------------------------------------------------------------------------------------------------------------------------------------------------------------------------------------------------------------------------------------------------------------------------------------------------------------------------------------------------------------------------------------------------------------------------------------------------------------------------------------------------------------------------------------------------------------------------------------------------------------------------------------------------------------------------------------------------------------------------------------------------------------------------------------------------------------------------------------------------------------------------------------------------------------------------------------------------------------------------------------------------------------------------------------------------------------------------------------------------------------------------------------------------------------------------------------------------------------------------------------------------------------------------------------------------------------------------------------------------------------------------------------------------------------------------------------------------------------------------------------------------------------------------------------------|-----------------------------|
| JUICIO                                                                                                                                                            | EVIDENCIA DE LA INVESTIGACION                                                                                                                                                                                                                                                                                                                                                                                                                                                                                                                                                                                                                                                                                                                                                                                                                                                                                                                                                                                                                                                                                                                                                                                                                                                                                                                                                                                                                                                                                                                                                                                                                                                                                                                                                                                                                                                                                                                                                                                                                                                                                                                                                                                                                                                                                                                                                                                                                                                                                                                                                                                                                                                                                                                                    | CONSIDERACIONES ADICIONALES |
| <ul style="list-style-type: none"> <li>○ Triviales</li> <li>○ Pequeños</li> <li>○ Moderados</li> <li>○ Grandes</li> <li>○ Varían</li> <li>○ No se sabe</li> </ul> | <p>La RSL de L Gossec et al 2015 que sirvió para actualizar las recomendaciones de la European League Against Rheumatism (EULAR) para el manejo farmacológico de la artritis psoriásica indica que las inyecciones locales de glucocorticoides deberían ser consideradas como una terapia adyuvante en pacientes con APs (nivel de evidencia 3b, grado de recomendación C). Los glucocorticoides sistémicos deben ser usados con precaución y a la dosis efectiva más baja (nivel de evidencia 4, grado de recomendación C). Esta recomendación no cambió con respecto a la guía anterior. Dado que no hay evidencia acumulada desde la última actualización de la guía, se reitera que los glucocorticoides intraarticulares pueden tener un lugar en el tratamiento de pacientes con APs, en particular en pacientes con monoartritis/oligoartritis. (5) Las inyecciones de glucocorticoides pueden también ser útiles en dactilitis (inyecciones en la vaina del tendón) y en la entesis, por ejemplo, en el codo o en la bursa retrocalcánea en la entesis de Aquiles. El ultrasonido puede ayudar a guiar estas inyecciones si es necesario. El temor a la reactivación de la psoriasis por el uso de glucocorticoides en el entorno de la reumatología no está justificado por la evidencia, pero se debe evitar el uso a largo plazo de glucocorticoides sistémicos en función de los riesgos significativos de eventos adversos. En particular, el perfil de eventos adversos de la terapia con glucocorticoides a largo plazo debe tenerse en cuenta al iniciar y especialmente continuar con los glucocorticoides orales. (13) (10).</p> <p>Kemal NAS et al 2018 (4) realizaron una RSL "Management of Psoriatic Arthritis: Turkish League Against Rheumatism (TLAR)". Dentro de sus recomendaciones, mencionan que las inyecciones locales con glucocorticoides podrían ser consideradas como parte del tratamiento en pacientes que tengan artritis psoriásica con artritis periférica, dactilitis y entesis. Los glucocorticoides sistémicos deben ser utilizados con precaución a la dosis mas baja posible. Las inyecciones intraarticulares de glucocorticoides son efectivas para el tratamiento de la artritis psoriásica (5). Los glucocorticoides locales o sistémicos pueden tener algunos efectos benéficos en pacientes con dactilitis y entesis (6)(7)(5). No hay datos de ECAS que hayan investigado el uso sistémico de glucocorticoides en artritis psoriásica. Los glucocorticoides sistémicos son ampliamente utilizados a bajas dosis en pacientes con artritis psoriásica en las clínicas de reumatología. (11). El uso de glucocorticoides parecería ser útil al menos para algunos pacientes con artritis psoriásica. (12).</p> |                             |

|                                                                                                                                                                   |                                                                                                                                                                                                                                                                                                                                                                                                                                                                                                                                                                                                                                                                                                                                                                                                                                                                                                                                                                                                                                                                                                                                                                                                                |                                    |
|-------------------------------------------------------------------------------------------------------------------------------------------------------------------|----------------------------------------------------------------------------------------------------------------------------------------------------------------------------------------------------------------------------------------------------------------------------------------------------------------------------------------------------------------------------------------------------------------------------------------------------------------------------------------------------------------------------------------------------------------------------------------------------------------------------------------------------------------------------------------------------------------------------------------------------------------------------------------------------------------------------------------------------------------------------------------------------------------------------------------------------------------------------------------------------------------------------------------------------------------------------------------------------------------------------------------------------------------------------------------------------------------|------------------------------------|
|                                                                                                                                                                   |                                                                                                                                                                                                                                                                                                                                                                                                                                                                                                                                                                                                                                                                                                                                                                                                                                                                                                                                                                                                                                                                                                                                                                                                                |                                    |
| <b>Efectos Indeseables</b><br>¿Qué tan sustanciales son los efectos indeseables que se pueden anticipar?                                                          |                                                                                                                                                                                                                                                                                                                                                                                                                                                                                                                                                                                                                                                                                                                                                                                                                                                                                                                                                                                                                                                                                                                                                                                                                |                                    |
| <b>JUICIO</b>                                                                                                                                                     | <b>EVIDENCIA DE LA INVESTIGACION</b>                                                                                                                                                                                                                                                                                                                                                                                                                                                                                                                                                                                                                                                                                                                                                                                                                                                                                                                                                                                                                                                                                                                                                                           | <b>CONSIDERACIONES ADICIONALES</b> |
| <ul style="list-style-type: none"> <li>○ Triviales</li> <li>○ Pequeños</li> <li>○ Moderados</li> <li>○ Grandes</li> <li>○ Varían</li> <li>○ No se sabe</li> </ul> | <p>Kemal NAS et al 2018 (4) realizaron una RSL "Management of Psoriatic Arthritis: Turkish League Against Rheumatism (TLAR)". Dentro de sus recomendaciones, mencionan que los Dermatólogos evitan el uso sistémico de glucocorticoides debido a su potencial efecto adverso sobre las lesiones dérmicas de la psoriasis y la rápida exacerbación de las lesiones dérmicas luego de suspender los glucocorticoides. (8)(9). En una evaluación retrospectiva de 104 pacientes, el 38% tenía antecedente de uso de glucocorticoides sistémicos antes del inicio de una psoriasis pustular y al menos 1/3 de estos casos fueron precipitados por la suspensión de la terapia con glucocorticoides. (8). Erupciones de las lesiones de la piel después de suspender los glucocorticoides no ha sido confirmado con evidencia en la práctica reumatológica; sin embargo, su uso por largos periodos de glucocorticoides sistémicos debería ser evitado por sus potenciales eventos adversos (10). Los glucocorticoides locales o sistémicos son recomendados para la artritis psoriásica por EULAR y GRAPPA a bajas dosis y por cortos periodos de tiempo de modo que se reduzca el riesgo de eventos adversos.</p> |                                    |
| <b>Certeza en la Evidencia</b><br>¿Cuál es la certeza en la evidencia global sobre los efectos de la opción a recomendar?                                         |                                                                                                                                                                                                                                                                                                                                                                                                                                                                                                                                                                                                                                                                                                                                                                                                                                                                                                                                                                                                                                                                                                                                                                                                                |                                    |
| <b>JUICIO</b>                                                                                                                                                     | <b>EVIDENCIA DE LA INVESTIGACION</b>                                                                                                                                                                                                                                                                                                                                                                                                                                                                                                                                                                                                                                                                                                                                                                                                                                                                                                                                                                                                                                                                                                                                                                           | <b>CONSIDERACIONES ADICIONALES</b> |

|                                                                                                                                                                 |                                                                                                          |                             |                                        |                                                                                                                                                                                                                                                                                                                                              |
|-----------------------------------------------------------------------------------------------------------------------------------------------------------------|----------------------------------------------------------------------------------------------------------|-----------------------------|----------------------------------------|----------------------------------------------------------------------------------------------------------------------------------------------------------------------------------------------------------------------------------------------------------------------------------------------------------------------------------------------|
| <ul style="list-style-type: none"> <li>○ <b>Muy baja</b></li> <li>○ Baja</li> <li>○ Moderada</li> <li>○ Alta</li> <li>○ No se identificaron estudios</li> </ul> | Hay evidencia de baja calidad que soporta el tratamiento de largo plazo con glucocorticoides sistémicos. |                             |                                        | Se reconoce que el tratamiento de corto plazo con glucocorticoides con disminución rápida de la dosis podría ser considerado en un limitado número de circunstancias, incluyendo brotes poliarticulares de artritis periférica, brotes durante el embarazo, o concomitantemente en presencia de brotes de enfermedad inflamatoria intestinal |
|                                                                                                                                                                 | <b>Desenlace</b>                                                                                         | <b>Importancia Relativa</b> | <b>Certeza de la evidencia (GRADE)</b> |                                                                                                                                                                                                                                                                                                                                              |
|                                                                                                                                                                 | control de enfermedad /remisión/baja actividad de síntomas                                               | CRITICA                     | ⊕○○○<br>Muy baja                       |                                                                                                                                                                                                                                                                                                                                              |
|                                                                                                                                                                 | mejoría de escalas de funcionalidad                                                                      | CRITICA                     | ⊕○○○<br>Muy baja                       |                                                                                                                                                                                                                                                                                                                                              |
|                                                                                                                                                                 | seguridad (eventos adversos)                                                                             | CRITICA                     | ⊕○○○<br>Muy baja                       |                                                                                                                                                                                                                                                                                                                                              |

**Valores de los pacientes**

¿Hay variación o poca certeza sobre cómo valoran las personas/los pacientes los desenlaces principales?

|                                                                                                                                                                                                                                                                                                         |                                                                                                                                                                                                                                                                                                                                                                                                                                                                                                                                                                                                                                                                                                                                                                                                                                                                                                                                                                                                                                                                                                                                                     |                                                                                                                                                                                                                                                                       |
|---------------------------------------------------------------------------------------------------------------------------------------------------------------------------------------------------------------------------------------------------------------------------------------------------------|-----------------------------------------------------------------------------------------------------------------------------------------------------------------------------------------------------------------------------------------------------------------------------------------------------------------------------------------------------------------------------------------------------------------------------------------------------------------------------------------------------------------------------------------------------------------------------------------------------------------------------------------------------------------------------------------------------------------------------------------------------------------------------------------------------------------------------------------------------------------------------------------------------------------------------------------------------------------------------------------------------------------------------------------------------------------------------------------------------------------------------------------------------|-----------------------------------------------------------------------------------------------------------------------------------------------------------------------------------------------------------------------------------------------------------------------|
| <ul style="list-style-type: none"> <li>○ Variabilidad o incertidumbre importante</li> <li>○ <b>Posiblemente hay variabilidad o incertidumbre importante</b></li> <li>○ Posiblemente No hay variabilidad o incertidumbre importante</li> <li>○ No hay variabilidad o incertidumbre importante</li> </ul> | Evidencia Indirecta a partir de un estudio cualitativo adelantado por Robson y cols (15), entre pacientes de Estados Unidos, Canadá y el Reino Unido, el cual se basó en 50 entrevistas a pacientes que recibían glucocorticoides por enfermedades reumatoideas diferentes a la EspA. Se identificó que existen tres temas generales que reportan los pacientes respecto a este tratamiento: 1. Los glucocorticoides son efectivos en el momento del diagnóstico y durante la recaída, y la abstinencia puede potenciar un brote o exacerbación de su enfermedad,. 2. Los glucocorticoides están asociados con importantes efectos emocionales, físicos y sociales (depresión, ansiedad, irritación, peso ganancia y cambio en la apariencia, diabetes mellitus, efecto en la familia y el trabajo). 3. Las percepciones de los pacientes de equilibrar los riesgos y beneficios de los glucocorticoides. Los pacientes identificaron los aspectos positivos del tratamiento con glucocorticoides; son de acción rápida y efectivas, pero expresaron su preocupación por los efectos adversos y la incertidumbre del proceso de reducción de dosis. | Estos resultados hacen ver la necesidad de valorar cuidadosamente los regímenes con glucocorticoides, sin embargo no se identificó información adicional a nivel local que permita documentar la percepción de los pacientes en Colombia respecto estos tratamientos. |
|---------------------------------------------------------------------------------------------------------------------------------------------------------------------------------------------------------------------------------------------------------------------------------------------------------|-----------------------------------------------------------------------------------------------------------------------------------------------------------------------------------------------------------------------------------------------------------------------------------------------------------------------------------------------------------------------------------------------------------------------------------------------------------------------------------------------------------------------------------------------------------------------------------------------------------------------------------------------------------------------------------------------------------------------------------------------------------------------------------------------------------------------------------------------------------------------------------------------------------------------------------------------------------------------------------------------------------------------------------------------------------------------------------------------------------------------------------------------------|-----------------------------------------------------------------------------------------------------------------------------------------------------------------------------------------------------------------------------------------------------------------------|

| Balance de los efectos<br>¿El balance entre los efectos deseables e indeseables favorece la opción o el comparador?                                                                                                                                                                                                          |                                                                                                                                                                                                                                                                                                                                                                                                                                                              |                                                                                                                                                                                                                                                                                                                                                                                                     |
|------------------------------------------------------------------------------------------------------------------------------------------------------------------------------------------------------------------------------------------------------------------------------------------------------------------------------|--------------------------------------------------------------------------------------------------------------------------------------------------------------------------------------------------------------------------------------------------------------------------------------------------------------------------------------------------------------------------------------------------------------------------------------------------------------|-----------------------------------------------------------------------------------------------------------------------------------------------------------------------------------------------------------------------------------------------------------------------------------------------------------------------------------------------------------------------------------------------------|
| JUICIO                                                                                                                                                                                                                                                                                                                       | EVIDENCIA DE LA INVESTIGACION                                                                                                                                                                                                                                                                                                                                                                                                                                | CONSIDERACIONES ADICIONALES                                                                                                                                                                                                                                                                                                                                                                         |
| <ul style="list-style-type: none"> <li>○ Favorece al comparador</li> <li>○ Probablemente favorece al comparador</li> <li>○ No favorece al comparador ni a la opción en evaluación</li> <li>○ Probablemente favorece a la opción</li> <li>○ Favorece la intervención</li> <li>○ Varía</li> <li>○ <b>No se sabe</b></li> </ul> | La baja calidad de los estudios acerca de la efectividad del tratamiento con GC en la EspAp, y el alto riesgo de sesgos no permiten concluir en favor o en contra de la intervención. Sin embargo, la evidencia indirecta respecto al perfil de seguridad del uso de corticoides hace pensar que son mayores los riesgos que los beneficios.                                                                                                                 |                                                                                                                                                                                                                                                                                                                                                                                                     |
| Recursos Requeridos y costos<br>Que tanto es el requerimiento de recursos (costos)?                                                                                                                                                                                                                                          |                                                                                                                                                                                                                                                                                                                                                                                                                                                              |                                                                                                                                                                                                                                                                                                                                                                                                     |
| JUICIO                                                                                                                                                                                                                                                                                                                       | EVIDENCIA DE LA INVESTIGACION                                                                                                                                                                                                                                                                                                                                                                                                                                | CONSIDERACIONES ADICIONALES                                                                                                                                                                                                                                                                                                                                                                         |
| <ul style="list-style-type: none"> <li>○ Grandes costos</li> <li>○ Costos moderados</li> <li>○ no significantes costos ni ahorros</li> <li>○ Moderados ahorros</li> <li>○ Grandes ahorros</li> <li>○ Varían</li> <li>○ <b>No se sabe</b></li> </ul>                                                                          | Evidencia indirecta a partir de un estudio adelantado en pacientes con artritis reumatoidea, mostró que los efectos gastrointestinales aumentan el costo de atención de los pacientes que reciben GC hasta 2,5 veces. También mostró que, ante la presencia de eventos adversos serios como infarto de miocardio y accidentes cerebrovasculares, el costo de atención por el uso de corticoides aumenta en forma considerable en comparación con no usarlos. | El costo de los GC es bajo, a pesar de que en algunos casos se requiere de dosis altas para lograr el control de la enfermedad. Sin embargo, la costo-efectividad de la intervención con glucocorticoides en comparación con no recibirlos está determinada por la frecuencia de eventos adversos serios, que aumentan los costos de atención en forma considerable. Por lo que se debe realizar un |

|  |  |                                                                                                                                                                                                |
|--|--|------------------------------------------------------------------------------------------------------------------------------------------------------------------------------------------------|
|  |  | balance entre el beneficio de la terapia y su duración, con el fin de reducir el impacto en los costos de atención por eventos adversos generalmente relacionados con su uso por largo tiempo. |
|--|--|------------------------------------------------------------------------------------------------------------------------------------------------------------------------------------------------|

| <b>Equidad</b><br>¿La implementación de la opción, tendrá impacto en la equidad?                                                                                                                                                                                |                                                                                                                                  |                                                                                                                                                                                                                  |
|-----------------------------------------------------------------------------------------------------------------------------------------------------------------------------------------------------------------------------------------------------------------|----------------------------------------------------------------------------------------------------------------------------------|------------------------------------------------------------------------------------------------------------------------------------------------------------------------------------------------------------------|
| JUICIO                                                                                                                                                                                                                                                          | EVIDENCIA DE LA INVESTIGACION                                                                                                    | CONSIDERACIONES ADICIONALES                                                                                                                                                                                      |
| <ul style="list-style-type: none"> <li>○ Reduce</li> <li>○ Probablemente se reduce la equidad</li> <li>○ Probablemente no impacta la equidad</li> <li>○ Probablemente incrementa</li> <li>○ Incrementa</li> <li>○ Varía</li> <li>○ <b>No se sabe</b></li> </ul> | Los estudios encontrados no evalúan el impacto de estas intervenciones en la equidad en salud.                                   | No se anticipa que el uso de glucocorticoides impacte negativamente la equidad en salud, dada su disponibilidad en todo el país y su inclusión como medicamentos esenciales en los planes de cobertura en salud. |
| <b>Aceptabilidad</b><br>¿Es la opción aceptada por los diferentes actores involucrados en su implementación?                                                                                                                                                    |                                                                                                                                  |                                                                                                                                                                                                                  |
| JUICIO                                                                                                                                                                                                                                                          | EVIDENCIA DE LA INVESTIGACION                                                                                                    | CONSIDERACIONES ADICIONALES                                                                                                                                                                                      |
| <ul style="list-style-type: none"> <li>○ No</li> <li>○ Probablemente no</li> <li>○ Probablemente si</li> <li>○ Si</li> <li>○ Varía</li> </ul>                                                                                                                   | No hay estudios que hayan evaluado la aceptabilidad del uso estas terapias en el tratamiento de pacientes con espondiloartritis. |                                                                                                                                                                                                                  |

|                                                                                   |                                                                                                 |                                                                                                                                                                                                                                                                                                  |
|-----------------------------------------------------------------------------------|-------------------------------------------------------------------------------------------------|--------------------------------------------------------------------------------------------------------------------------------------------------------------------------------------------------------------------------------------------------------------------------------------------------|
| ○ No se sabe                                                                      |                                                                                                 |                                                                                                                                                                                                                                                                                                  |
| <b>Factibilidad</b><br>¿Es la opción factible de IMPLEMENTAR?                     |                                                                                                 |                                                                                                                                                                                                                                                                                                  |
| <b>JUICIO</b>                                                                     | <b>EVIDENCIA DE LA INVESTIGACION</b>                                                            | <b>CONSIDERACIONES ADICIONALES</b>                                                                                                                                                                                                                                                               |
| No<br>○ Probablemente no<br>○ Probablemente si<br>○ Si<br>○ Varia<br>○ No se sabe | No hay estudios que reporten evaluación de la factibilidad de implementar estas intervenciones. | La opción es factible de implementar, sin embargo al juzgar por la evidencia existente, la utilización de glucocorticoides no tiene soporte sólido y parecería que los riesgos sobrepasan los beneficios, sin embargo, la utilización en algunos casos podría ser de utilidad para los pacientes |

### Resumen de Juicios

|                         | JUICIOS                    |                         |                             |                               |  |       |                     |
|-------------------------|----------------------------|-------------------------|-----------------------------|-------------------------------|--|-------|---------------------|
| PROBLEMA                | No                         | Probablemente no        | Probablemente si            | Si                            |  | Varia | No se sabe          |
| EFFECTOS DESEABLES      | Triviales                  | Pequeños                | Moderados                   | Grandes                       |  | Varia | No se sabe          |
| EFFECTOS INDESEABLES    | Grandes                    | Moderados               | Pequeños                    | Triviales                     |  | Varia | No se sabe          |
| CERTEZA EN LA EVIDENCIA | Muy Baja                   | Baja                    | Moderada                    | Alta                          |  |       | No incluyó estudios |
| VALORES DE PACIENTES    | Importante incertidumbre o | Posiblemente Importante | Probablemente No Importante | No Importante incertidumbre o |  |       |                     |

|                               | JUICIOS                |                                      |                                                 |                                        |                          |       |            |
|-------------------------------|------------------------|--------------------------------------|-------------------------------------------------|----------------------------------------|--------------------------|-------|------------|
|                               | variabilidad           | incertidumbre o variabilidad         | incertidumbre o variabilidad                    | variabilidad                           |                          |       |            |
| <b>BALANCE DE LOS EFECTOS</b> | Favorece el comparador | Probablemente Favorece el comparador | No favorece Ni la intervención ni el comparador | Probablemente favorece la intervención | Favorece la intervención | Varia | No se sabe |
| <b>RECURSOS REQUERIDOS</b>    | Grandes costos         | Moderados costos                     | Costos y ahorros insignificantes                | Moderados ahorros                      | Grandes ahorros          | Varia | No se sabe |
| <b>EQUIDAD</b>                | Reducida               | Probablemente reducida               | Probablemente no impactada                      | Probablemente incrementada             | Incrementada             | Varia | No se sabe |
| <b>ACEPTABILIDAD</b>          | No                     | Probablemente No                     | Probablemente Si                                | Si                                     |                          | Varia | No se sabe |
| <b>FACTIBILIDAD</b>           | No                     | Probablemente No                     | Probablemente Si                                | Si                                     |                          | Varia | No se sabe |

### Tipo de Recomendación- Glucocorticoides sistémicos

|                                                    |                                                  |                                                                           |                                                |                                           |
|----------------------------------------------------|--------------------------------------------------|---------------------------------------------------------------------------|------------------------------------------------|-------------------------------------------|
| <b>Recomendación fuerte en contra de la opción</b> | Recomendación condicional en contra de la opción | Recomendación condicional a favor de cualquiera la opción o su comparador | Recomendación condicional a favor de la opción | Recomendación fuerte a favor de la opción |
| X                                                  | ○                                                | ○                                                                         | ○                                              | ○                                         |

### Tipo de Recomendación- Glucocorticoides locales

|                                             |                                                  |                                                                           |                                                       |                                           |
|---------------------------------------------|--------------------------------------------------|---------------------------------------------------------------------------|-------------------------------------------------------|-------------------------------------------|
| Recomendación fuerte en contra de la opción | Recomendación condicional en contra de la opción | Recomendación condicional a favor de cualquiera la opción o su comparador | <b>Recomendación condicional a favor de la opción</b> | Recomendación fuerte a favor de la opción |
| ○                                           | ○                                                | ○                                                                         | X                                                     | ○                                         |

### Conclusiones

**Recomendación**

En pacientes con EspAp se recomienda no usar Glucocorticoides sistémicos. Recomendación fuerte en contra del tratamiento. Certeza de la evidencia muy baja.

**Justificación**

El panel considera que el balance de los efectos va en contra de su uso, dados los conocidos efectos indeseables del uso de corticoides sistémicos y la no evidencia sobre sus beneficios. Adicionalmente, considera a que a pesar de la poca evidencia los glucocorticoides se utilizan con frecuencia en estos pacientes, por lo que por lo que esta recomendación, permite reducir la variabilidad del enfoque terapéutico en EspAp, optimizar y racionalizar los costos de atención, acercar el manejo y el diagnóstico a estándares de óptima calidad, lograr diagnósticos oportunos y remisiones tempranas al reumatólogo.

**Consideraciones por subgrupos**

1. El panel considera que en pacientes con artritis psoriásica, tratados con glucocorticoides sistémicos, la suspensión de los mismos puede ocasionar una reactivación de las lesiones dérmicas de la psoriasis.
2. En pacientes con EspAp que presentan monoartritis/oligoartritis, dactilitis o entesitis se recomienda en forma condicional las inyecciones locales con glucocorticoides como complemento a la terapia sistémica

**Consideraciones de implementación**

Socialización y difusión de la guía por los diferentes entes de salud y gubernamentales.

**Monitoreo y evaluación de cumplimiento**

Adicionalmente considera los efectos deletéreos de la ingesta de glucocorticoides por periodos prolongados de tiempo evidenciados a lo largo de muchos años en varios estudios.

Monitoreo a través del registro de medicamentos en la plataforma MIPRES

#### Prioridades de investigación futura

Evaluar la efectividad y seguridad de la combinación de DMARDs sintéticos convencionales comparado con lDMARDs sintéticos convencionales en monoterapia (con y sin bajas dosis de glucocorticoides)(6)

Evaluar el riesgo de erupciones cutáneas relacionadas con el uso de glucocorticoides sistémicos y en particular, a bajas dosis.

Evaluar el balance riesgo/beneficio de la terapia de larga duración con glucocorticoides.

Evaluar la efectividad y seguridad del uso de glucocorticoides intramusculares en APs

## GPC para pacientes con Espondiloartritis Periférica ASOREUMA

### Pregunta 2: APÉNDICE. Recomendaciones en Guías de Práctica Clínica

**GPC CANADIENSE** (23) Management of Spondyloarthritis. Part I: Principles of the Management of Research Consortium of Canada Treatment Recommendations for the 2014 Update of the Canadian Rheumatology Association/Spondyloarthritis.

Recomendación 8: “Considere la inyección de glucocorticoides en el sitio de la inflamación, incluyendo las articulaciones sacroilíacas, articulaciones periféricas y entesis. Experimentos clínicos controlados con placebo de inyecciones articulares guiadas por Rx mostraron significativa mejoría en el dolor con mínimos eventos adversos”. El Nivel de la evidencia para inyecciones intra-articulares en las sacroilíacas fue I y la fuerza de la recomendación A, para otras articulaciones el nivel de evidencia fue IV y la fuerza de la recomendación D.

**ASAS-EULAR** (24) 2016 update of the ASAS-EULAR management recommendations for axial spondyloarthritis

Recomendación 7: “Las inyecciones de glucocorticoides dirigidas localmente al sitio de la inflamación pueden ser consideradas”.

Esta recomendación combina, como en la versión previa, dos modos de uso de los glucocorticoides: local y sistémico. La recomendación acerca del uso de inyecciones locales no ha cambiado indicando que son una buena opción para tratar artritis y entesis, aunque falta evidencia directa.

**USA** (25) Update of the American College of Rheumatology/ Spondylitis Association of America/Spondyloarthritis.

Recomendación 67: “Se recomienda fuertemente en contra del tratamiento con glucocorticoides sistémicos (nivel de evidencia muy bajo)”

**FRANCESA** (26) 2018 update of French Society for Rheumatology (SFR) recommendations about the everyday management of patients with spondyloarthritis.

Recomendación 9: “En la mayoría de los pacientes, la terapia sistémica con glucocorticoides no está justificada, particularmente para tratar manifestaciones axiales. Las inyecciones locales de glucocorticoides pueden ser consideradas para el tratamiento de la artritis y de la entesis”.

Las inyecciones de glucocorticoides en las articulaciones periféricas afectadas, articulaciones sacroilíacas o en las entesis, proporcionan rápida mejoría de los síntomas en pacientes quienes tienen un número limitado de sitios involucrados.

**NICE 2017** (27)

Recomendación 1.4.12 Considere inyecciones locales de corticosteroides como monoterapia en mono artritis no progresiva.

## GPC para pacientes con Espondiloartritis Periférica ASOREUMA

### Referencias

1. Cañete Crespillo J. Guía de Práctica Clínica para el Tratamiento de la Espondiloartritis Axial y la Artritis Psoriásica. Soc Española Reumatol [Internet]. 2015;1–206. Available from: [https://www.ser.es/wp-content/uploads/2016/04/GPC\\_-Tratamiento\\_EspAax\\_APs\\_DEF.pdf](https://www.ser.es/wp-content/uploads/2016/04/GPC_-Tratamiento_EspAax_APs_DEF.pdf)
2. Rahman P. Epidemiology of Psoriatic Arthritis. *Psoriatic React Arthritis A Companion to Rheumatol*. 2007;64(2):1–3.
3. Taylor W, Gladman D, Helliwell P, Marchesoni A, Mease P, Mielants H. Classification criteria for psoriatic arthritis: Development of new criteria from a large international study. *Arthritis Rheum*. 2006;54(8):2665–73.
4. Nas K, Kiliç E, Çevik R, Bodur H, Ataman Ş, Ayhan F, et al. Management of psoriatic arthritis: Turkish League Against Rheumatism (TLAR) expert opinions. *Arch Rheumatol*. 2018;33(2):108–27.
5. Eder L, Chandran V, Ueng J, Bhella S, Lee KA, Rahman P, et al. Predictors of response to intra-articular steroid injection in psoriatic arthritis. *Rheumatology*. 2010;49(7):1367–73.
6. Gossec L, Smolen JS, Ramiro S, De Wit M, Cutolo M, Dougados M, et al. European League Against Rheumatism (EULAR) recommendations for the management of psoriatic arthritis with pharmacological therapies: 2015 update. *Ann Rheum Dis*. 2016;75(3):499–510.
7. Coates LC, Kavanaugh A, Mease PJ, Soriano ER, Laura Acosta-Felquer M, Armstrong AW, et al. Group for Research and Assessment of Psoriasis and Psoriatic Arthritis 2015 Treatment Recommendations for Psoriatic Arthritis. *Arthritis Rheumatol* [Internet]. 2016 Mar;n/a-n/a. Available from: <http://doi.wiley.com/10.1002/art.39573>
8. BAKER H, RYAN TJ. Generalized Pustular Psoriasis: a Clinical and Epidemiological Study of 104 Cases. *Br J Dermatol*. 1968;80(12):771–93.
9. Coates LC, Helliwell PS. Psoriasis flare with corticosteroid use in psoriatic arthritis. *Br J Dermatol*. 2016;174(1):219–21.
10. Hoes JN, Jacobs JWG, Verstappen SMM, Bijlsma JWJ, Van Der Heijden GJMG. Adverse events of low- to medium-dose oral glucocorticoids in inflammatory diseases: A meta-analysis. *Ann Rheum Dis*. 2009;68(12):1833–8.
11. Zink A, Thiele K, Huscher D, Listing J, Sieper J, Krause A, et al. Healthcare and burden of disease in psoriatic arthritis. A comparison with rheumatoid arthritis and ankylosing spondylitis. *J Rheumatol*. 2006;33(1):86–90.
12. Fendler C, Baraliakos X, Braun J. Glucocorticoid treatment in spondyloarthritis. *Clin Exp Rheumatol*. 2011;29(5 SUPPL. 68).

## GPC para pacientes con Espondiloartritis Periférica ASOREUMA

13. Gaujoux-Viala C, Gossec L. When and for how long should glucocorticoids be used in rheumatoid arthritis? International guidelines and recommendations. *Ann N Y Acad Sci*. 2014;1318(1):32–40.
14. Ash Z, Gaujoux-Viala C, Gossec L, Hensor EMA, FitzGerald O, Winthrop K, et al. A systematic literature review of drug therapies for the treatment of psoriatic arthritis: Current evidence and meta-analysis informing the EULAR recommendations for the management of psoriatic arthritis. *Ann Rheum Dis*. 2012;71(3):319–26.
15. Pipitone N, Kingsley GH, Manzo A, Scott DL, Pitzalis C. Current concepts and new developments in the treatment of psoriatic arthritis. *Rheumatology*. 2003;42(10):1138–48.
16. Ritchlin CT. Therapies for psoriatic enthesopathy. A systematic review. *J Rheumatol*. 2006;33(7):1435–8.
17. Toivanen A. Managing reactive arthritis. *Rheumatology*. 2000;39(2):117–9.
18. Caprilli R, Gassull MA, Escher JC, Moser G, Munkholm P, Forbes A, et al. European evidence based consensus on the diagnosis and management of Crohn's disease: Special situations. *Gut*. 2006;55(SUPPL. 1):36–58.
19. Soriano ER, McHugh NJ. Therapies for peripheral joint disease in psoriatic arthritis. A systematic review. *J Rheumatol*. 2006;33(7):1422–30.
20. McDonough AK, Curtis JR, Saag KG. The epidemiology of glucocorticoid-associated adverse events. *Curr Opin Rheumatol* [Internet]. 2008 Mar;20(2):131–7. Available from: <http://journals.lww.com/00002281-200803000-00004>
21. Robson JC, Dawson J, Cronholm PF, Ashdown S, Easley E, Kellom KS, et al. Patient perceptions of glucocorticoids in anti-neutrophil cytoplasmic antibody-associated vasculitis. *Rheumatol Int* [Internet]. 2018 Apr 9;38(4):675–82. Available from: <http://link.springer.com/10.1007/s00296-017-3855-6>
22. Pisu M, James N, Sampsel S, Saag KG. The cost of glucocorticoid-associated adverse events in rheumatoid arthritis. *Rheumatology* [Internet]. 2005 Jun 1;44(6):781–8. Available from: <http://academic.oup.com/rheumatology/article/44/6/781/1784792/The-cost-of-glucocorticoid-associated-adverse>
23. Rohekar S, Chan J, Tse SML, Haroon N, Chandran V, Bessette L, et al. 2014 Update of the Canadian Rheumatology Association/Spondyloarthritis Research Consortium of Canada Treatment Recommendations for the Management of Spondyloarthritis. Part I: Principles of the Management of Spondyloarthritis in Canada. *J Rheumatol* [Internet]. 2015 Apr;42(4):654–64. Available from: <http://www.jrheum.org/lookup/doi/10.3899/jrheum.141000>
24. van der Heijde D, Ramiro S, Landewé R, Baraliakos X, Van den Bosch F, Sepriano A, et al. 2016 update of the ASAS-EULAR management recommendations for axial spondyloarthritis. *Ann Rheum Dis* [Internet]. 2017 Jun;76(6):978–91. Available from: <http://ard.bmj.com/lookup/doi/10.1136/annrheumdis-2016-210770>

## GPC para pacientes con Espondiloartritis Periférica ASOREUMA

25. Ward MM, Deodhar A, Gensler LS, Dubreuil M, Yu D, Khan MA, et al. 2019 Update of the American College of Rheumatology/Spondylitis Association of America/Spondyloarthritis Research and Treatment Network Recommendations for the Treatment of Ankylosing Spondylitis and Nonradiographic Axial Spondyloarthritis. *Arthritis Rheumatol* [Internet]. 2019 Oct 22;71(10):1599–613. Available from: <https://onlinelibrary.wiley.com/doi/abs/10.1002/art.41042>
26. Wendling D, Lukas C, Prati C, Claudepierre P, Gossec L, Goupille P, et al. 2018 update of French Society for Rheumatology (SFR) recommendations about the everyday management of patients with spondyloarthritis. *Jt Bone Spine* [Internet]. 2018 May;85(3):275–84. Available from: <https://linkinghub.elsevier.com/retrieve/pii/S1297319X18300083>
27. Spondyloarthritis in Over 16s: Diagnosis and Management. Available from: <https://www.ncbi.nlm.nih.gov/books/NBK553609/>

## GPC para pacientes con Espondiloartritis Periférica ASOREUMA

Pregunta 3: ¿ En pacientes adultos con Espondiloartritis Periférica y falla a DMARDs convencionales, se debe usar como primera opción de terapia biológica un anti TNF $\alpha$  o un anti IL-17 o un anti IL12-23 o inhibidores JAK, dada su efectividad en el control de la enfermedad y perfil de seguridad?

|                     |                                                                                                             |         |
|---------------------|-------------------------------------------------------------------------------------------------------------|---------|
| <b>Población</b>    | Pacientes con espondiloartritis periférica que no toleran o han fallado a terapia con DMARDs convencionales |         |
| <b>Intervención</b> | Anti-TNF $\alpha$ ; anti-IL-17A ; Anti 12-23; inhibidor JAK*                                                |         |
| <b>Comparación</b>  | Anti-TNF $\alpha$ ; anti-IL-17A ; Anti 12-23; inhibidor JAK /placebo                                        |         |
| <b>Desenlaces</b>   | Control enfermedad- Remisión/baja actividad de síntomas                                                     | Crítico |
|                     | Control enfermedad- Mejoría en escalas de funcionalidad                                                     | Crítico |
|                     | Control enfermedad- progresión radiográfica                                                                 | Crítico |
|                     | calidad de vida                                                                                             | Crítico |
|                     | Perfil de seguridad: Eventos adversos                                                                       | Crítico |

### Antecedentes

La espondiloartritis periférica (EspAp) es un término que hace referencia la presencia de síntomas y hallazgos de espondiloartritis que son principal o únicamente periféricos, en lugar de axiales. Los pacientes con EspAp pueden también cursar con síntomas axiales, como el dolor lumbar, pero estos no son predominantes. La EspAp incluye a las artritis, entesitis y dactilitis, que suelen asociarse a otras enfermedades reumáticas, y de acuerdo a la afección predominante y su asociación con síntomas extraarticulares, se clasifican en diferentes grupos: artritis psoriásica (APs), espondiloartritis asociada a enfermedad intestinal inflamatoria (EII), artritis reactiva, y pacientes con características de EspAp que no se asocian a las características de los grupos mencionados.

Por tratarse de un grupo de enfermedades cuya afección articular es la inflamación, el uso de antiinflamatorios no esteroideos (AINES) es la primera línea de tratamiento. Sin embargo, un porcentaje variable de pacientes no alcanzan mejoría de sus síntomas con estos medicamentos, o debido a toxicidad deben suspenderlos. En esta situación, usualmente se ha indicado el uso de medicamentos antirreumáticos modificadores de enfermedad convencionales (cDMARDs, de sus siglas en inglés). Estos incluyen

## GPC para pacientes con Espondiloartritis Periférica ASOREUMA

principalmente, aunque no únicamente, al leflunomide, la sulfasalazina y el metotrexate. La elección del fármaco suele depender de las características asociadas a la EspAp, debido a que la mayoría tienen una efectividad similar para reducir la enfermedad articular. Así, la sulfasalazina se indica para pacientes con EII o características similares a EII, por la efectividad de este medicamento en este grupo de enfermedades intestinales; y el metotrexate se indica para pacientes con EspAp asociada a psoriasis, enfermedad sobre la que la sulfasalazina no es efectiva.

No obstante, un grupo de pacientes también presentarán falla terapéutica o toxicidad con estos cDMARDs, situación en la que han sido útiles los medicamentos antirreumáticos modificadores de enfermedad biológicos (bDMARDs). Estos incluyen diferentes fármacos que se agrupan de acuerdo a su mecanismo de acción, e incluyen inhibidores TNF alfa (iTnFa), inhibidores JAK (iJAK), antagonistas de la IL-17A (anti-IL17A), antagonistas de la IL-23 (anti-IL23) e inhibidores de la fosfodiesterasa CD4 (iPDE4).

Es pertinente mencionar que uno de los tipos de EspAp, la artritis reactiva, por su naturaleza autolimitada en la mayoría de los pacientes, usualmente no requiere de tratamiento con medicamentos biológicos.

Para el tratamiento de la artritis psoriásica, el tipo más común de EspAp, se encuentran aprobados por la FDA y EMA: etanercept, infliximab, adalimumab, golimumab, certolizumab pegol, secukinumab, ixekizumab, ustekinumab, abatacept, y tofacitinib. Estos últimos dos no hacen parte de los grupos mencionados en la pregunta de interés, sin embargo, son evaluados en los estudios que se presentan a continuación y se incluyen en esta revisión.

### Evidencia

No se identificaron estudios que hicieran comparaciones directas de las cuatro clases de medicamentos de interés. Son pocos los estudios que han comparado moléculas de una o dos de estas clases entre sí de forma directa. No obstante, debido al gran volumen de estudios comparados con placebo, y la presencia de ciertas comparaciones directas en la literatura, se han desarrollado estudios que comparan indirectamente estos medicamentos mediante metaanálisis en red (1–7). Ante el refinamiento de esta metodología y con la posibilidad de verificar la consistencia entre los distintos estudios de este tipo que se encuentran publicados, los resultados de los metaanálisis en red identificados constituyen la principal fuente de información para esta síntesis de evidencia en torno a efectividad.

La artritis psoriásica es el tipo de EspAp más frecuente y la mayoría de los estudios clínicos, en los que se basó el presente resumen, incluyen esta subpoblación de EspAp exclusivamente.

## GPC para pacientes con Espondiloartritis Periférica ASOREUMA

*Comparaciones indirectas**Control de la enfermedad*

El estudio de comparaciones indirectas más reciente corresponde una revisión sistemática con metaanálisis en red que comparó la efectividad de varios bDMARDs de diferentes clases para el manejo de la artritis psoriásica (7). Esta revisión sintetizó 50 estudios, y logró incluir 25 en el análisis mencionado. Los medicamentos evaluados fueron anti-IL17A (secukinumab e ixekizumab), anti-IL12-23 (ustekinumab), iTNFa (adalimumab, certolizumab, etanercept, golimumab, infliximab), inhibidor JAK (tofacitinib), PDE4 (apremilast), y un inhibidor de activación de células T (abatacept). Justamente este último medicamento, fue el único que no se consideró superior a placebo en los análisis sobre el efecto de los medicamentos al evaluar su efecto sobre las escalas ACR y PASI. Este estudio también comparó los diferentes medicamentos en la frecuencia de lograr una respuesta de acuerdo a la escala PsARC. En las tablas de efectos deseables en el marco de evidencia a decisiones (ver más adelante), se pueden observar los medicamentos evaluados, ordenados de acuerdo a su efecto benéfico basado en los estimados puntuales del metaanálisis en red para la proporción de pacientes que alcanzaron respuesta de acuerdo a PsARC y en cuanto a la reducción en puntaje ACR. Allí se muestra la superioridad de golimumab e infliximab, seguidos de etanercept, certolizumab, secukinumab, ixekizumab, adalimumab, tofacitinib, ustekinumab y apremilast.

Otra revisión sistemática con metaanálisis en red publicada en 2016 reporta que en pacientes con APs que no tuvieron una buena respuesta o no toleraron tratamiento con cDMARDs o AINES, existe mayor probabilidad de lograr una respuesta ACR20 con el secukinumab e iTNFa como etanercept, infliximab, adalimumab y golimumab, comparado al tratamiento con apremilast, certolizumab y ustekinumab (6), consistente con los resultados mencionados anteriormente. Otras revisiones con metaanálisis en red compararon menor cantidad de medicamentos, incluso se algunas que compararon dos moléculas únicamente (1–5). Los resultados de estas comparaciones indirectas selectivas también son consistentes con el metaanálisis en red más reciente (y el que mayor número de medicamentos evaluó), y con lo expuesto en las tablas de resumen más adelante.

Un metaanálisis en red adicional, evaluó los medicamentos bDMARDs de clases diferentes a iTNFa en población sin tratamiento previo con bDMARDs (4). Este incluyó 8 estudios de secukinumab, ustekinumab, abatacept y apremilast, y reportó mayor proporción de respuesta ACR20 asociada a secukinumab (150mg y 300 mg) fue significativamente mayor que para apremilast y ustekinumab; un efecto que no se vio en la población ya tratada con, o con falla a, iTNFa. También se reporta que los cuatro medicamentos son más efectivos que placebo para lograr mejoría, con la excepción de

## GPC para pacientes con Espondiloartritis Periférica ASOREUMA

abatacept en dosis de 3 mg (dosis inusual ya que la mayoría de los regímenes usan 20-30 mg). Así mismo, respecto a la respuesta de acuerdo a PASI75, todos los tratamientos, menos abatacept (incluso en dosis habituales), fueron superiores a placebo, un hallazgo consistente con lo reportado en una revisión sistemática de 2015 (8).

Dos revisiones sistemáticas recientes (2019 y 2020) que evaluaron los medicamentos biológicos disponibles para el tratamiento de artritis psoriásica, también concluyen que todas las moléculas evaluadas parecen ser efectivas para el tratamiento de esta enfermedad (9,10). Una de estas revisiones además incluye información de bDMARDs que actúan sobre IL-23-p19: guselkumab y risankizumab. A partir de dos experimentos clínicos, concluye que guselkumab es superior a placebo en reducción de síntomas de artritis, entesitis y dactilitis; y risankizumab mejora síntomas de artritis y manifestaciones cutáneas comparado con placebo, pero no se parece ser superior en cuanto a entesitis, dactilitis y funcionalidad (10).

Los estimados con mayor confianza y mejor calidad de la evidencia son para el desenlace de mejoría medido por ACR20. Los anti-IL-17A (secukinumab, ixekizumab), un anti-IL23p19 (guselkumab), e inhibidor JAK (tofacitinib, filgotinib), fueron efectivos para disminuir signos y síntomas de enfermedad en todos los dominios evaluados en pacientes con APs (10).

Los iTNFa infliximab, golimumab y etanercept fueron los medicamentos más efectivos en la reducción de síntomas y signos articulares (ACR, PsARC), aunque las diferencias con moléculas de otras clases son pequeñas y muy pocas son estadísticamente significativas (7). Respecto al efecto sobre manifestaciones cutáneas (PASI), infliximab, ixekizumab, secukinumab y golimumab fueron los medicamentos que mostraron el mayor efecto benéfico (7).

De acuerdo con lo expuesto en esta sección, no hay evidencia que soporte el uso preferencial de iTNFa sobre otras clases de bDMARDs, como anti-IL-12/23 o anti-IL 17, como primera opción de tratamiento en artritis psoriásica periférica luego de falla con AINES/cDMARDs (9). El análisis de ACR, PsARC y PASI se basa en una población de pacientes sin tratamiento previo con bDMARDs, sin embargo, en un análisis de sensibilidad hecho con una población mixta de pacientes con y sin tratamiento previo con bDMARDs, los resultados son similares. Por esto, la elección del medicamento adecuado debe ser individual y considerar las preferencias del paciente, eventos adversos, disponibilidad y costos.

### *Calidad de vida relacionada con salud*

Se identificó una revisión sistemática con metaanálisis en red y evaluación económica que evaluó los años de vida ajustados por calidad (QALY) incrementales, con horizontes temporales de 10 y 40 años, asociados a diferentes medicamentos:

## GPC para pacientes con Espondiloartritis Periférica ASOREUMA

adalimumab, golimumab, etanercept e infliximab. En ambas evaluaciones estos iTNFa se asociaron a un incremento en QALYs comparado con el manejo convencional, lo que refleja el impacto positivo de estos medicamentos sobre la calidad de vida de los pacientes al largo plazo.

Para apreciar el efecto de los diferentes medicamentos sobre la calidad de vida relacionada con salud se puede tomar en consideración los resultados expuestos en la sección de efectividad, pues las medidas de efectividad allí expuestas (ACR, PASI, PsARC) son escalas que evalúan desenlaces importantes para los pacientes, y que hablan de mejoría en la funcionalidad articular, en la reducción del dolor articular, e incluso en la resolución de lesiones cutáneas; aspectos que como se mencionó afectan la calidad de vida relacionada con salud en los afectados.

### *Eventos adversos serios y no serios*

La red de eventos adversos del metaanálisis que evaluó todos los medicamentos de interés incluyó 22 estudios correspondientes a 16 tratamientos diferentes. Este indica que el número de eventos adversos serios fue bajo, esta baja frecuencia hizo la medición imprecisa por basarse en pocos eventos observados; sin embargo, no se identificó ningún tratamiento asociado a un incremento de EAS comparado con placebo (7).

Estos resultados son consistentes con otros metaanálisis en red que reportan no haber encontrado diferencias significativas en la proporción de pacientes con eventos adversos serios al comparar indirectamente diferentes medicamentos entre sí, ni en las comparaciones con placebo (3,9,10).

En un metaanálisis ya mencionado de medicamentos bDMARDs no-iTNFa (apremilast, abatacept, secukinumab y ustekinumab) (4), cualquier evento adverso ocurrió más frecuentemente con apremilast 20 y 30 mg comparado con secukinumab y con placebo, pero no se identificó diferencia entre los medicamentos bDMARDs, ni al compararlos con placebo respecto a eventos adversos serios. Ustekinumab fue el único medicamento que se asoció a un incremento significativo de retiros debido a eventos adversos.

Una revisión sistemática que informó la actualización de recomendaciones EULAR 2019 para el tratamiento de EspAp reportó que la terapia con bDMARDs se asocia con un mayor riesgo de infección comparado con otros tratamientos, algo que no se ha identificado con cDMARDs. Sin embargo, este riesgo es bajo (10).

Los eventos adversos no-serios parecen ser más comunes, y pueden llegar a aparecer entre 49-57% a corto plazo, y entre 83-93% a largo plazo. Los eventos adversos más frecuentemente reportados son infecciones, nasofaringitis y cefaleas (11). Para anotar, el ixekizumab presenta una frecuencia estimada del 15.7% de reacciones en el

## GPC para pacientes con Espondiloartritis Periférica ASOREUMA

sitio de inyección, uno de los eventos adversos más frecuentes para este medicamento (11). Tampoco se identificó un riesgo aumentado de malignidades asociado a el uso de bDMARDs, una preocupación latente (10,12).

### Valores y preferencia de pacientes

No se identificaron estudios específicos sobre las preferencias de pacientes. Estas se pueden abstraer a partir del efecto descrito de los medicamentos y de los eventos adversos específicos para cada molécula. Como queja general para muchos de los medicamentos se reportan solo inconformidades con la frecuencia y tipo de administración (esquemas bisemanales o bimensuales, aplicados subcutáneamente).

### Consumo de recursos y costos

En un informe de evaluación que solo incluyó iTNFa, se reportó que este grupo de medicamentos tenía una probabilidad de ser costo-efectivo del 97% con un umbral de pago de €60 000 (13). Otra evaluación económica más reciente que comparó iTNFa concluyó que etanercept se podía considerar la estrategia más costo efectiva en pacientes con APs y grados diversos de psoriasis concomitante, comparado con infliximab, golimumab y adalimumab. Etanercept tuvo una probabilidad del 70% de ser costo efectivo con un umbral de pago de 30 000 libras esterlinas por QALY (5).

Una evaluación económica realizada para Argentina y publicada en 2019, comparó secukinumab con ustekinumab, adalimumab, infliximab, etanercept, golimumab y certolizumab, para el tratamiento de artritis psoriásica en pacientes sin tratamiento previo con bDMARDs (14). Esta reportó que, para un horizonte de toda la vida, secukinumab se asocia al mayor aumento de QALYs (7.18, superado levemente solo por infliximab con 7.31) al menor costo en pacientes con APs sin psoriasis concomitante (mientras que infliximab tiene costos asociados cercanos al doble que los de secukinumab). En pacientes con psoriasis moderada a severa concomitante, secukinumab presentó el mayor número de QALYs asociados también a costos similares o menores que las demás intervenciones, por lo que se consideró dominante (14).

Una evaluación de costo-efectividad hecha en España y publicada en 2020, que comparó a ixekizumab y secukinumab para el tratamiento de artirtis psoriásica, constituye la evidencia económica identificada más reciente (15). Esta reporta diferencias pequeñas en los QALY asociados a cada intervención con un horizonte de tiempo a toda la vida, con una diferencia de 0.093 QALYs, y diferencias anuales en costos de €2658 a favor de ixekizumab.

## Pregunta 3: Marco de trabajo –De la evidencia a las decisiones

|                        |                                                                                      |
|------------------------|--------------------------------------------------------------------------------------|
| PREGUNTA               |                                                                                      |
| POBLACION              | <i>Población de espondiloartritis periférica.</i>                                    |
| INTERVENCIÓN           | <i>anti -IL17A; anti IL-17; anti-IL12-23; inhibidores JAK</i>                        |
| COMPARACIÓN            | <i>anti -IL17A; anti IL-17; anti-IL12-23; inhibidores JAK</i>                        |
| DESENLACES PRINCIPALES | <i>Efectividad- Respuesta terapéutica<br/>Perfil de seguridad – Eventos adversos</i> |
| ÁMBITO                 | <i>Ambulatorio</i>                                                                   |
| PERSPECTIVA            | <i>Recomendación de GPC en el contexto de espondiloartritis</i>                      |
| CONFLICTO DE INTERÉS:  | <i>No hay ninguna declaración de conflictos de interés</i>                           |

## Evaluación

| Problema<br>Es el problema una prioridad?                                                                                                                                          |                                                                                                                                                                                                                                                                                                                                                                                                                                                                                                                                                                                                                                                                                                                                                                                         |                             |
|------------------------------------------------------------------------------------------------------------------------------------------------------------------------------------|-----------------------------------------------------------------------------------------------------------------------------------------------------------------------------------------------------------------------------------------------------------------------------------------------------------------------------------------------------------------------------------------------------------------------------------------------------------------------------------------------------------------------------------------------------------------------------------------------------------------------------------------------------------------------------------------------------------------------------------------------------------------------------------------|-----------------------------|
| JUICIO                                                                                                                                                                             | EVIDENCIA DE LA INVESTIGACION                                                                                                                                                                                                                                                                                                                                                                                                                                                                                                                                                                                                                                                                                                                                                           | CONSIDERACIONES ADICIONALES |
| <ul style="list-style-type: none"> <li>○ No</li> <li>○ Probablemente No</li> <li>○ Probablemente Si</li> <li>○ <b>Si</b></li> <li>○ Es variable</li> <li>○ No se conoce</li> </ul> | La espondiloartritis periférica afecta crónicamente varias articulaciones de las extremidades, siendo principalmente afectadas las rodillas, y las articulaciones en pies y manos. Esta afección genera dolor, que limita funcionalmente, puede causar deformidad y deteriora así la calidad de vida. Los AINES son la primera línea de tratamiento, seguidos de los DMARDs convencionales. En los pacientes que la enfermedad continúa activa a pesar de manejo, o que no toleran estos medicamentos, surge la duda acerca del grupo farmacológico adecuado para emplear como siguiente opción de tratamiento. Los inhibidores de TNFa son la clase con más años en el mercado y han tenido un efecto satisfactorio. Medicamentos más recientes de otros grupos, como los antagonistas |                             |

|                                                                                                                                                            |                                                                                                                                                    |                 |              |                         |         |         |                                                                                                                                                                                                                                                                                                |
|------------------------------------------------------------------------------------------------------------------------------------------------------------|----------------------------------------------------------------------------------------------------------------------------------------------------|-----------------|--------------|-------------------------|---------|---------|------------------------------------------------------------------------------------------------------------------------------------------------------------------------------------------------------------------------------------------------------------------------------------------------|
|                                                                                                                                                            | de IL-17A, pueden preferirse por su efecto sobre condiciones concomitantes, como ocurre con la psoriasis en pacientes con artritis psoriásica.     |                 |              |                         |         |         |                                                                                                                                                                                                                                                                                                |
| Efectos deseables (beneficios de la opción a recomendar)                                                                                                   |                                                                                                                                                    |                 |              |                         |         |         |                                                                                                                                                                                                                                                                                                |
| ¿Qué tan sustanciales son los efectos deseables de la opción?                                                                                              |                                                                                                                                                    |                 |              |                         |         |         |                                                                                                                                                                                                                                                                                                |
| JUICIO                                                                                                                                                     | EVIDENCIA DE LA INVESTIGACION                                                                                                                      |                 |              |                         |         |         | CONSIDERACIONES ADICIONALES                                                                                                                                                                                                                                                                    |
| <ul style="list-style-type: none"><li>○ Triviales</li><li>○ Pequeños</li><li>○ Moderados</li><li>○ Grandes</li><li>○ Varían</li><li>○ No se sabe</li></ul> | 1. DMARDs biológicos y sintéticos comparados con placebo en el tratamiento de artritis psoriásica: Respuesta PsARC a partir de metaanálisis en red |                 |              |                         |         |         | <p>El ranking asignado a las intervenciones puede exagerar diferencias pequeñas en el beneficio de las mismas. Estos rankings deben considerarse junto con las medidas absolutas y relativas de asociación.</p> <p>Es de anotar que Apremilast no está comercializado en el país.</p> <p>.</p> |
|                                                                                                                                                            | Medicamento:                                                                                                                                       | Efecto relativo | IC 95%       | Certeza de la evidencia | Ranking |         |                                                                                                                                                                                                                                                                                                |
|                                                                                                                                                            | Golimumab 50 mg                                                                                                                                    | 10.15           | 5.74 ; 18.95 | Moderada                | 1       | (1-2)   |                                                                                                                                                                                                                                                                                                |
|                                                                                                                                                            | Infliximab 5 mg/kg c/8 sem                                                                                                                         | 9.75            | 5.87 ; 17.16 | Moderada                | 2       | (1-2)   |                                                                                                                                                                                                                                                                                                |
|                                                                                                                                                            | Etanercept 25 mg BIW/50 QIW                                                                                                                        | 7.54            | 4.40 ; 13.4  | Moderada                | 3       | (3-3)   |                                                                                                                                                                                                                                                                                                |
|                                                                                                                                                            | Certolizumab (todas las dosis)                                                                                                                     | 3.70            | 2.39 ; 5.60  | Moderada                | 4       | (4-5)   |                                                                                                                                                                                                                                                                                                |
|                                                                                                                                                            | Secukinumab 150 mg c/4 sem                                                                                                                         | 3.55            | 1.94 ; 6.67  | Alta                    | 5       | (4-6)   |                                                                                                                                                                                                                                                                                                |
|                                                                                                                                                            | Ixekizumab 80 mg c/2 sem                                                                                                                           | 3.22            | 1.93 ; 5.42  | Moderada                | 6       | (6-7)   |                                                                                                                                                                                                                                                                                                |
|                                                                                                                                                            | Adalimumab 40 mg c/2 sem                                                                                                                           | 3.03            | 2.24 ; 4.04  | Baja                    | 7       | (5-9)   |                                                                                                                                                                                                                                                                                                |
|                                                                                                                                                            | Secukinumab 300 mg c/4 sem                                                                                                                         | 2.64            | 1.46 ; 4.74  | Moderada                | 8       | (7-9)   |                                                                                                                                                                                                                                                                                                |
|                                                                                                                                                            | Ixekizumab 80 mg c/4 sem                                                                                                                           | 2.49            | 1.55 ; 4.09  | Moderada                | 9       | (8-9)   |                                                                                                                                                                                                                                                                                                |
|                                                                                                                                                            | Apremilast 30 mg                                                                                                                                   | 1.92            | 1.38 ; 2.59  | Moderada                | 10      | (10-11) |                                                                                                                                                                                                                                                                                                |

|  |                      |      |             |          |    |         |  |
|--|----------------------|------|-------------|----------|----|---------|--|
|  | Tofacitinib 5 mg BID | 1.61 | 1.00 ; 2.64 | Moderada | 11 | (10-11) |  |
|--|----------------------|------|-------------|----------|----|---------|--|

## Efectos deseables (beneficios de la opción a recomendar)

¿Qué tan sustanciales son los efectos deseables de la opción?

| JUICIO                                                                                                                                      | EVIDENCIA DE LA INVESTIGACION                                                                                                                                         |        |                |                 |                         |         | CONSIDERACIONES ADICIONALES                                                                                                                                                                                                                                                        |         |
|---------------------------------------------------------------------------------------------------------------------------------------------|-----------------------------------------------------------------------------------------------------------------------------------------------------------------------|--------|----------------|-----------------|-------------------------|---------|------------------------------------------------------------------------------------------------------------------------------------------------------------------------------------------------------------------------------------------------------------------------------------|---------|
| <div>○ Triviales</div> <div>○ Pequeños</div> <div>○ Moderados</div> <div>○ <b>Grandes</b></div> <div>○ Varían</div> <div>○ No se sabe</div> | 2. DMARDs biológicos y sintéticos comparados con placebo en el tratamiento de artritis psoriásica:<br><u>reducción en puntaje ACR a partir de metaanálisis en red</u> |        |                |                 |                         |         | <div>El ranking asignado a las intervenciones puede exagerar diferencias pequeñas en el beneficio de las mismas. Estos rankings deben considerarse junto con las medidas absolutas y relativas de asociación. Es de anotar que Apremilast no está comercializado en el país.</div> |         |
|                                                                                                                                             | Medicamento:                                                                                                                                                          |        | Diferencia     | IC 95%          | Certeza de la evidencia | Ranking |                                                                                                                                                                                                                                                                                    |         |
|                                                                                                                                             | Infliximab 5 mg/kg c/8 sem                                                                                                                                            |        | -1.509         | -1.823 ; -1.196 | Moderada                | 1       |                                                                                                                                                                                                                                                                                    | (1-1)   |
|                                                                                                                                             | Golimumab 50 mg                                                                                                                                                       |        | -1.417         | -1.796 ; -1.038 | Moderada                | 2       |                                                                                                                                                                                                                                                                                    | (2-2)   |
|                                                                                                                                             | Etanercept 25 mg BIW/50 QIW                                                                                                                                           |        | -1.337         | -1.651 ; -1.011 | Moderada                | 3       |                                                                                                                                                                                                                                                                                    | (3-3)   |
|                                                                                                                                             | Ixekizumab 80 mg c/2 sem                                                                                                                                              |        | -1.014         | -1.288 ; -0.739 | Moderada                | 4       |                                                                                                                                                                                                                                                                                    | (4-6)   |
|                                                                                                                                             | Secukinumab 300 mg c/4 sem                                                                                                                                            |        | -0.938         | -1.095 ; -0.768 | Moderada                | 5       |                                                                                                                                                                                                                                                                                    | (5-7)   |
|                                                                                                                                             | Adalimumab 40 mg c/2 sem                                                                                                                                              |        | -0.929         | -1.099 ; 0.773  | Baja                    | 6       |                                                                                                                                                                                                                                                                                    | (4-6)   |
|                                                                                                                                             | Ixekizumab 80 mg c/4 sem                                                                                                                                              |        | -0.91          | -1.197 ; -0.635 | Moderada                | 7       |                                                                                                                                                                                                                                                                                    | (5-8)   |
|                                                                                                                                             | Certolizumab (todas las dosis)                                                                                                                                        |        | -0.788         | -1.062 ; -0.500 | Moderada                | 8       |                                                                                                                                                                                                                                                                                    | (8-9)   |
|                                                                                                                                             | Secukinumab 150 mg c/4 sem                                                                                                                                            |        | -0.78          | -0.937 ; -0.636 | Alta                    | 9       |                                                                                                                                                                                                                                                                                    | (7-11)  |
|                                                                                                                                             | Tofacitinib 5 mg BID                                                                                                                                                  |        | -0.717         | -1.004 ; -0.442 | Moderada                | 10      |                                                                                                                                                                                                                                                                                    | (10-10) |
|                                                                                                                                             | Ustekinumab 45 mg                                                                                                                                                     |        | -0.561         | -0.809 ; -0.338 | Alta                    | 11      |                                                                                                                                                                                                                                                                                    | (11-12) |
|                                                                                                                                             | Ustekinumab 90 mg                                                                                                                                                     |        | -0.549         | -0.771 ; -0.326 | Alta                    | 12      |                                                                                                                                                                                                                                                                                    | (12-13) |
|                                                                                                                                             | Apremilast 30 mg                                                                                                                                                      |        | -0.538         | -0.695 ; -0.368 | Moderada                | 13      |                                                                                                                                                                                                                                                                                    | (11-14) |
| Abatacept 125 mg                                                                                                                            |                                                                                                                                                                       | -0.275 | -0.680 ; 0.104 | Moderada        | 14                      | (15-15) |                                                                                                                                                                                                                                                                                    |         |

|                                                                                                                                      |                                                                                                                                                                                                 |                         |                          |                             |                                        |                         |                             |
|--------------------------------------------------------------------------------------------------------------------------------------|-------------------------------------------------------------------------------------------------------------------------------------------------------------------------------------------------|-------------------------|--------------------------|-----------------------------|----------------------------------------|-------------------------|-----------------------------|
|                                                                                                                                      | Abatacept 10mg                                                                                                                                                                                  | -0.496                  | -1.045 ; 0.066           | Baja                        | 15                                     | (9-15)                  |                             |
| Efectos Indeseables                                                                                                                  |                                                                                                                                                                                                 |                         |                          |                             |                                        |                         |                             |
| ¿Qué tan sustanciales son los efectos indeseables que se pueden anticipar?                                                           |                                                                                                                                                                                                 |                         |                          |                             |                                        |                         |                             |
| JUICIO                                                                                                                               | EVIDENCIA DE LA INVESTIGACION                                                                                                                                                                   |                         |                          |                             |                                        |                         | CONSIDERACIONES ADICIONALES |
| <div>○ Triviales</div> <div>○ Pequeños</div> <div>○ Moderados</div> <div>○ Grandes</div> <div>○ Varían</div> <div>○ No se sabe</div> | 1. <u>DMARDs biológicos y sintéticos comparados con placebo en el tratamiento de artritis psoriásica: frecuencia de eventos adversos serios a partir de metaanálisis para cada medicamento:</u> |                         |                          |                             |                                        |                         |                             |
|                                                                                                                                      | Medicamento:                                                                                                                                                                                    | Número de participantes | Efecto relativo (IC 95%) | Riesgo absoluto con placebo | Diferencia con la intervención         | Calidad de la evidencia |                             |
|                                                                                                                                      | Adalimumab 40mg c/otra sem                                                                                                                                                                      | 313 (1 ECA)             | RR 1.50 (0.49 a 4.63)    | 31 por 1.000                | 15 más por 1.000 (16 menos a 112 más)  | Muy Baja                |                             |
|                                                                                                                                      | Etanercept 25 mg 2xsem                                                                                                                                                                          | 205 (1 ECA)             | RR 1.03 (0.26 a 4.01)    | 38 por 1.000                | 1 más por 1.000 (28 menos a 116 más)   | Baja                    |                             |
|                                                                                                                                      | Golimumab 50mg c/ 4 sem                                                                                                                                                                         | 259 (1 ECA)             | RR 0.33 (0.09 a 1.25)    | 62 por 1.000                | 42 menos por 1.000 (56 menos a 15 más) | Baja                    |                             |
|                                                                                                                                      | Golimumab 100 mg c/4 sem                                                                                                                                                                        | 259 (1 ECA)             | RR 0.44 (0.13 a 1.47)    | 62 por 1.000                | 35 menos por 1.000 (54 menos a 29 más) | Baja                    |                             |
|                                                                                                                                      | Ceralizumab 400 mg                                                                                                                                                                              | 271 (1 ECA)             | RR 2.18 (0.85 a 5.57)    | 44 por 1.000                | 52 más por 1.000 (7 menos a 202 más)   | Baja                    |                             |
|                                                                                                                                      | Ceralizumab 200 mg                                                                                                                                                                              | 274 (1 ECA)             | RR 1.31 (0.47 a 3.69)    | 44 por 1.000                | 14 más por 1.000 (23 menos a 119 más)  | Baja                    |                             |
|                                                                                                                                      |                                                                                                                                                                                                 |                         |                          |                             |                                        |                         |                             |

|                                                                                         |                                                                                                                                |              |                        |                                 |                                        |          |                             |
|-----------------------------------------------------------------------------------------|--------------------------------------------------------------------------------------------------------------------------------|--------------|------------------------|---------------------------------|----------------------------------------|----------|-----------------------------|
|                                                                                         | Infliximab 5 mg/kg c/8 sem                                                                                                     | 103 (1 ECA)  | RR 0.98 (0.06 a 15.26) | 20 por 1.000                    | 0 menos por 1.000 (18 menos a 280 más) | Muy Baja |                             |
|                                                                                         | Ixekizumab 80 mg c/4 sem                                                                                                       | 453 (2 ECAs) | RR 1.43 (0.36 a 5.69)  | 27 por 1.000                    | 12 más por 1.000 (17 menos a 126 más)  | Baja     |                             |
|                                                                                         | Ixekizumab 80 mg c/2 sem                                                                                                       | 449 (2 ECAs) | RR 1.80 (0.68 a 4.79)  | 27 por 1.000                    | 21 más por 1.000 (9 menos a 102 más)   | Baja     |                             |
|                                                                                         | Secukinumab 150 mg                                                                                                             | 602 (2 ECAs) | RR 0.84 (0.37 a 1.91)  | 40 por 1.000                    | 6 menos por 1.000 (25 menos a 36 más)  | Moderada |                             |
|                                                                                         | Secukinumab 300 mg                                                                                                             | 198 (1 ECA)  | RR 2.45 (0.49 a 12.33) | 20 por 1.000                    | 30 más por 1.000 (10 menos a 231 más)  | Baja     |                             |
|                                                                                         | Creado a partir de tablas SoF individuales para cada medicamento disponibles como material suplementario de Dressler 2019 (9). |              |                        |                                 |                                        |          |                             |
| Certeza en la Evidencia                                                                 |                                                                                                                                |              |                        |                                 |                                        |          |                             |
| ¿Cuál es la certeza en la evidencia global sobre los efectos de la opción a recomendar? |                                                                                                                                |              |                        |                                 |                                        |          |                             |
| JUICIO                                                                                  | EVIDENCIA DE LA INVESTIGACION                                                                                                  |              |                        |                                 |                                        |          | CONSIDERACIONES ADICIONALES |
| ○ Muy baja<br>○ Baja<br>○ Moderada<br>○ Alta<br>○ No se identificaron estudios          | Desenlace                                                                                                                      |              | Importancia Relativa   | Certeza de la evidencia (GRADE) |                                        |          |                             |
|                                                                                         | control de enfermedad - Respuesta PsARC                                                                                        |              | CRITICA                | ⊕⊕⊕○Moderada                    |                                        |          |                             |
|                                                                                         | control de enfermedad - reducción en puntaje ACR                                                                               |              | CRITICA                | ⊕⊕⊕○Moderada                    |                                        |          |                             |
|                                                                                         | seguridad (eventos adversos)                                                                                                   |              | CRITICA                | ⊕⊕○○<br>Baja                    |                                        |          |                             |

| Valores de los pacientes                                                                                                                                                                                                                                                                         |                                                                                                                                                                                                                                                                                                                                                 |                                                                         |
|--------------------------------------------------------------------------------------------------------------------------------------------------------------------------------------------------------------------------------------------------------------------------------------------------|-------------------------------------------------------------------------------------------------------------------------------------------------------------------------------------------------------------------------------------------------------------------------------------------------------------------------------------------------|-------------------------------------------------------------------------|
| ¿Hay variación o poca certeza sobre cómo valoran las personas/los pacientes los desenlaces principales?                                                                                                                                                                                          |                                                                                                                                                                                                                                                                                                                                                 |                                                                         |
| JUICIO                                                                                                                                                                                                                                                                                           | EVIDENCIA DE LA INVESTIGACION                                                                                                                                                                                                                                                                                                                   | CONSIDERACIONES ADICIONALES                                             |
| <ul style="list-style-type: none"> <li>○ Variabilidad o incertidumbre importante</li> <li>○ Posiblemente hay variabilidad o incertidumbre importante</li> <li>○ Posiblemente No hay variabilidad o incertidumbre importante</li> <li>○ No hay variabilidad o incertidumbre importante</li> </ul> | <p>Hay suficiente evidencia sobre la mejoría en escalas de funcionalidad, movilidad, dolor y bienestar general (desenlaces reportados por pacientes) asociada al uso de iTNFa, anti-IL17A, anti-IL12-23, inhibidor JAK e iPDE4 en EspAp. Asimismo, la baja frecuencia de eventos adversos hace que sea inusual la suspensión de los mismos.</p> | <p>Es de anotar que Apremilast no está comercializado en el país. .</p> |

| <b>Balance de los efectos</b><br>¿El balance entre los efectos deseables e indeseables favorece la opción o el comparador?                                                                                                                                                                                              |                                                                                                                         |                                    |
|-------------------------------------------------------------------------------------------------------------------------------------------------------------------------------------------------------------------------------------------------------------------------------------------------------------------------|-------------------------------------------------------------------------------------------------------------------------|------------------------------------|
| <b>JUICIO</b>                                                                                                                                                                                                                                                                                                           | <b>EVIDENCIA DE LA INVESTIGACION</b>                                                                                    | <b>CONSIDERACIONES ADICIONALES</b> |
| <ul style="list-style-type: none"> <li>○ Favorece al comparador</li> <li>○ Probablemente favorece al comparador</li> <li>○ No favorece al comparador ni a la opción en evaluación</li> <li>○ Probablemente favorece a la opción</li> <li>○ Favorece a la intervención</li> <li>○ Varía</li> <li>○ No se sabe</li> </ul> | El balance de los efectos deseables e indeseables a partir de la evidencia evaluada favorece el uso de la intervención. |                                    |

| Recursos necesarios<br>¿Qué tan grandes son los gastos monetarios necesarios?                                                                                                                                                                           |                                                                                                                                                                                                                                                                                                                                                                                                                                                                                                                                                                                                                                                                                                                                                                                                                                                                                                                                                                                                                                                           |                                                                                                                                                                                                                                                                                                                                                            |
|---------------------------------------------------------------------------------------------------------------------------------------------------------------------------------------------------------------------------------------------------------|-----------------------------------------------------------------------------------------------------------------------------------------------------------------------------------------------------------------------------------------------------------------------------------------------------------------------------------------------------------------------------------------------------------------------------------------------------------------------------------------------------------------------------------------------------------------------------------------------------------------------------------------------------------------------------------------------------------------------------------------------------------------------------------------------------------------------------------------------------------------------------------------------------------------------------------------------------------------------------------------------------------------------------------------------------------|------------------------------------------------------------------------------------------------------------------------------------------------------------------------------------------------------------------------------------------------------------------------------------------------------------------------------------------------------------|
| JUICIO                                                                                                                                                                                                                                                  | EVIDENCIA DE LA INVESTIGACION                                                                                                                                                                                                                                                                                                                                                                                                                                                                                                                                                                                                                                                                                                                                                                                                                                                                                                                                                                                                                             | CONSIDERACIONES ADICIONALES                                                                                                                                                                                                                                                                                                                                |
| <ul style="list-style-type: none"> <li>○ Grandes costos</li> <li>○ Costos moderados</li> <li>○ no significantes</li> <li>○ costos ni ahorros</li> <li>○ Moderados ahorros</li> <li>○ Grandes ahorros</li> <li>○ Varían</li> <li>○ No se sabe</li> </ul> | <p>Evidencia indirecta, de otras jurisdicciones muestra que para un horizonte de toda la vida, el secukinumab se asocia al mayor aumento de QALYs (7.18, superado levemente solo por infliximab con 7.31) al menor costo en pacientes con APs sin psoriasis concomitante (mientras que infliximab tiene costos asociados cercanos al doble que los de secukinumab). En pacientes con psoriasis moderada a severa concomitante, secukinumab presentó el mayor número de QALYs asociados también a costos similares o menores que las demás intervenciones, por lo que se consideró dominante.</p> <p>Una evaluación de costo-efectividad hecha en España y publicada en 2020, que comparó a ixekizumab y secukinumab para el tratamiento de artitis psoriásica, constituye la evidencia económica identificada más reciente. Esta reporta diferencias pequeñas en los QALY asociados a cada intervención con un horizonte de tiempo a toda la vida, con una diferencia de 0.093 QALYs, y diferencias anuales en costos de €2658 a favor de ixekizumab.</p> | <p>Se identificó que secukinumab es dominante frente a la mayoría de los medicamentos aquí evaluados con los que se ha comparado en cuando a su probabilidad de ser costo efectivo frente a diferentes umbrales de voluntad de pago, en países europeos y uno de América Latina.</p> <p>Es de anotar que Apremilast no está comercializado en el país.</p> |
| Equidad<br>¿La implementación de la opción, tendrá impacto en la equidad?                                                                                                                                                                               |                                                                                                                                                                                                                                                                                                                                                                                                                                                                                                                                                                                                                                                                                                                                                                                                                                                                                                                                                                                                                                                           |                                                                                                                                                                                                                                                                                                                                                            |
| JUICIO                                                                                                                                                                                                                                                  | EVIDENCIA DE LA INVESTIGACION                                                                                                                                                                                                                                                                                                                                                                                                                                                                                                                                                                                                                                                                                                                                                                                                                                                                                                                                                                                                                             | CONSIDERACIONES ADICIONALES                                                                                                                                                                                                                                                                                                                                |
| <ul style="list-style-type: none"> <li>○ Reduce</li> <li>○ Probablemente se reduce la equidad</li> <li>○ Probablemente no impacta la equidad</li> </ul>                                                                                                 | <p>No se encontraron estudios que discutieran efectos sobre la equidad entorno al manejo de pacientes con espondiloartritis periférica.</p>                                                                                                                                                                                                                                                                                                                                                                                                                                                                                                                                                                                                                                                                                                                                                                                                                                                                                                               | <p>Se considera que dado el costo de los medicamentos iTNFa, anti-IL17A, anti-IL12-23, inhibidor JAK e iPDE4 y su baja cobertura a través de las EPS es posible que recomendar su uso aumente las</p>                                                                                                                                                      |

|                                                                                                                                                                     |                                                                                                                                                                                                                                                                                                                                                                                                                                                                                                                         |                                                                                                                                      |
|---------------------------------------------------------------------------------------------------------------------------------------------------------------------|-------------------------------------------------------------------------------------------------------------------------------------------------------------------------------------------------------------------------------------------------------------------------------------------------------------------------------------------------------------------------------------------------------------------------------------------------------------------------------------------------------------------------|--------------------------------------------------------------------------------------------------------------------------------------|
| <ul style="list-style-type: none"> <li>○ Probablemente incrementa</li> <li>○ Incrementa</li> <li>○ Varía</li> <li>○ No se sabe</li> </ul>                           |                                                                                                                                                                                                                                                                                                                                                                                                                                                                                                                         | <p>brechas de inequidad en el acceso la salud.</p> <p>El Apremilast al no está comercializado en el país.</p>                        |
| <b>Aceptabilidad</b><br>¿Es la opción aceptada por los diferentes actores involucrados en su implementación?                                                        |                                                                                                                                                                                                                                                                                                                                                                                                                                                                                                                         |                                                                                                                                      |
| <b>JUICIO</b>                                                                                                                                                       | <b>EVIDENCIA DE LA INVESTIGACION</b>                                                                                                                                                                                                                                                                                                                                                                                                                                                                                    | <b>CONSIDERACIONES ADICIONALES</b>                                                                                                   |
| <ul style="list-style-type: none"> <li>○ No</li> <li>○ Probablemente no</li> <li>○ Probablemente si</li> <li>○ Si</li> <li>○ Varía</li> <li>○ No se sabe</li> </ul> | <p>La aceptabilidad de las diferentes clases de medicamentos evaluados es alta debido a su efecto satisfactorio sobre control de la enfermedad y baja frecuencia de eventos adversos.</p> <p>Tanto los pacientes como los expertos clínicos expresan satisfacción de contar con nuevas alternativas dado su mecanismo de acción diferente y su efecto sobre la psoriasis u otras manifestaciones extraarticulares concomitantes, que ofrecen más opciones para lograr el manejo adecuado de pacientes individuales.</p> |                                                                                                                                      |
| <b>Factibilidad</b><br>¿Es la opción factible de IMPLEMENTAR?                                                                                                       |                                                                                                                                                                                                                                                                                                                                                                                                                                                                                                                         |                                                                                                                                      |
| <b>JUICIO</b>                                                                                                                                                       | <b>EVIDENCIA DE LA INVESTIGACION</b>                                                                                                                                                                                                                                                                                                                                                                                                                                                                                    | <b>CONSIDERACIONES ADICIONALES</b>                                                                                                   |
| <ul style="list-style-type: none"> <li>No</li> <li>○ Probablemente no</li> <li>○ Probablemente si</li> <li>○ Si</li> </ul>                                          | <p>No se encontraron estudios de factibilidad de pacientes en espondiloartritis periférica con relación a la implementación de estos medicamentos (más allá de los costos).</p>                                                                                                                                                                                                                                                                                                                                         | <p>Se considera factible de ser implementada dada la disponibilidad de los medicamentos en el país y que cuentan con registro de</p> |

|                         |  |                   |
|-------------------------|--|-------------------|
| ○ Varia<br>○ No se sabe |  | comercialización. |
|-------------------------|--|-------------------|

## Resumen de Juicios

|                         | JUICIOS                                 |                                                      |                                                          |                                            |                          |       |                     |
|-------------------------|-----------------------------------------|------------------------------------------------------|----------------------------------------------------------|--------------------------------------------|--------------------------|-------|---------------------|
| PROBLEMA                | No                                      | Probablemente no                                     | Probablemente si                                         | Si                                         |                          | Varia | No se sabe          |
| EFFECTOS DESEABLES      | Triviales                               | Pequeños                                             | Moderados                                                | Grandes                                    |                          | Varia | No se sabe          |
| EFFECTOS INDESEABLES    | Grandes                                 | Moderados                                            | Pequeños                                                 | Triviales                                  |                          | Varia | No se sabe          |
| CERTEZA EN LA EVIDENCIA | Muy Baja                                | Baja                                                 | Moderada                                                 | Alta                                       |                          |       | No incluyó estudios |
| VALORES DE PACIENTES    | Importante incertidumbre o variabilidad | Posiblemente Importante incertidumbre o variabilidad | Probablemente No Importante incertidumbre o variabilidad | No Importante incertidumbre o variabilidad |                          |       |                     |
| BALANCE DE LOS EFECTOS  | Favorece el comparador                  | Probablemente Favorece el comparador                 | No favorece Ni la intervención ni el comparador          | Probablemente favorece la intervención     | Favorece la intervención | Varia | No se sabe          |
| RECURSOS REQUERIDOS     | Grandes costos                          | Moderados costos                                     | Costos y ahorros insignificantes                         | Moderados ahorros                          | Grandes ahorros          | Varia | No se sabe          |
| EQUIDAD                 | Reducida                                | Probablemente reducida                               | Probablemente no impactada                               | Probablemente incrementada                 | Incrementada             | Varia | No se sabe          |
| ACEPTABILIDAD           | No                                      | Probablemente No                                     | Probablemente Si                                         | Si                                         |                          | Varia | No se sabe          |
| FACTIBILIDAD            | No                                      | Probablemente No                                     | Probablemente Si                                         | Si                                         |                          | Varia | No se sabe          |

## Tipo de Recomendación

|                                                  |                                                       |                                                                                |                                                     |                                                              |
|--------------------------------------------------|-------------------------------------------------------|--------------------------------------------------------------------------------|-----------------------------------------------------|--------------------------------------------------------------|
| Recomendación fuerte en contra de la opción<br>○ | Recomendación condicional en contra de la opción<br>○ | Recomendación condicional a favor de cualquiera la opción o su comparador<br>○ | Recomendación condicional a favor de la opción<br>○ | <b>Recomendación fuerte a favor de la opción</b><br><b>X</b> |
|--------------------------------------------------|-------------------------------------------------------|--------------------------------------------------------------------------------|-----------------------------------------------------|--------------------------------------------------------------|

## Conclusiones

### Recomendación

En pacientes con EspAp que presentan falla terapéutica o intolerancia a cDMARDs se recomienda el inicio de terapia con un anti TNF $\alpha$  o un anti-IL17A. Recomendación fuerte a favor de la intervención. Certeza de la evidencia moderada

### Justificación

La evidencia sobre el beneficio de las diferentes clases de medicamentos evaluados es variable, pero en su mayoría es de calidad moderada. La evidencia sobre seguridad es usualmente de calidad baja, debido a la baja frecuencia de eventos observados que obliga a calificar negativamente la evidencia debido a imprecisión. Los costos y demás consideraciones entorno a las intervenciones también favorecen esta recomendación.

### Consideraciones por subgrupos

1. En pacientes con artritis psoriásica y compromiso cutáneo considerable, que presentan falla terapéutica o intolerancia a cDMARDs se recomienda el inicio de terapia con agente que tenga mayor efecto sobre estas manifestaciones como ixekizumab y secukinumab (16-17). Recomendación a favor de la intervención. Certeza de la evidencia moderada.
2. En pacientes con artritis psoriásica que presentan falla terapéutica o intolerancia a cDMARDs, se recomienda el inicio de terapia con iTNF $\alpha$  o un anti-IL17A o un anti IL 12-23 o un iPDE4 o un inhibidor JAK (tofacitinib). Recomendación fuerte a favor de la intervención. Certeza de la evidencia moderada.

### Consideraciones de implementación

Se identificó que secukinumab es dominante frente a la mayoría de los medicamentos aquí evaluados con los que se ha comparado en cuando a su probabilidad de ser costo efectivo frente a diferentes umbrales de voluntad de pago, en países europeos y uno de América Latina. En la evaluación económica identificada que compara ixekizumab y secukinumab, el primero parece ser equiparable e incluso se asoció a menores costos y más QALYs. Esta evidencia sugiere que estos anti-IL17A son dominantes en su probabilidad de costo efectividad comparado con otros medicamentos de las diferentes clases evaluadas.

### Monitoreo y evaluación de cumplimiento

Para todas las clases de medicamentos bDMARDs debe cumplirse con seguimiento de los pacientes y evaluación de respuesta, que de ser menor a 20% luego de un periodo de tratamiento adecuado debe llevar a suspensión del medicamento e inicio de tratamiento con otra molécula de otra clase, considerando características individuales de los pacientes.

### Prioridades de investigación futura

Se deben conducir experimentos clínicos aleatorizados que comparen en paralelo el efecto de medicamentos de las clases Inhibidores TNF $\alpha$ ; anti IL-17A; anti-IL12-23; inhibidores JAK ; iPDE4, para contar con evidencia directa que ante el advenimiento de moléculas nuevas permita informar adecuadamente metaanálisis en red que permitan identificar la mejor opción el tratamiento. Es necesario conducir estudios económicos que comparen las alternativas más efectivas y seguras para identificar los medicamentos con mejores balances de beneficios y costos en el contexto nacional.

## PREGUNTA 3: Tablas de resumen de hallazgos

| DMARDs biológicos y sintéticos comparados con placebo en el tratamiento de artritis psoriásica:<br>Reducción en puntaje ACR a partir de metanálisis en red |                 |                 |                         |         |         |                                                                                                                               |
|------------------------------------------------------------------------------------------------------------------------------------------------------------|-----------------|-----------------|-------------------------|---------|---------|-------------------------------------------------------------------------------------------------------------------------------|
| Medicamento:                                                                                                                                               | Efecto relativo | IC 95%          | Certeza de la evidencia | Ranking |         | Juicios                                                                                                                       |
| Infliximab 5 mg/kg c/8 semanas                                                                                                                             | -1,509          | -1.823 ; -1.196 | Moderada                | 1       | (1-1)   | a) Se combinó la información de seguimiento de 16 y 24 semanas                                                                |
| Golimumab 50 mg                                                                                                                                            | -1,417          | -1.796 ; -1.038 | Moderada                | 2       | (2-2)   | a) Solo un estudio disponible                                                                                                 |
| Etanercept 25 mg 2xSemana /50 1xSemana                                                                                                                     | -1,337          | -1.651 ; -1.011 | Moderada                | 3       | (3-3)   | a) Solo un estudio disponible                                                                                                 |
| Ixekizumab 80 mg c/2 semanas                                                                                                                               | -1,014          | -1.288 ; -0.739 | Moderada                | 4       | (4-6)   | a) Criterios de inclusión diferentes con pacientes que han recibido bDMARDs y no-respondedores.                               |
| Secukinumab 300 mg c/4 semanas                                                                                                                             | -0,938          | -1.095 ; -0.768 | Moderada                | 5       | (5-7)   | a) Solo un estudio disponible                                                                                                 |
| Adalimumab 40 mg c/2 semanas                                                                                                                               | -0,929          | -1.099 ; -0.773 | Baja                    | 6       | (4-6)   | a) Riesgo de sesgo por dudas en el ocultamiento de la asignación y el método de aleatorización. b) Solo un estudio disponible |
| Ixekizumab 80 mg c/4 semanas                                                                                                                               | -0,91           | -1.197 ; -0.635 | Moderada                | 7       | (5-8)   | a) Criterios de inclusión diferentes con pacientes que han recibido bDMARDs y no-respondedores.                               |
| Certolizumab (todas las dosis)                                                                                                                             | -0,788          | -1.062 ; -0.500 | Moderada                | 8       | (8-9)   | a) Solo un estudio disponible por dosis.                                                                                      |
| Secukinumab 150 mg c/4 semanas                                                                                                                             | -0,78           | -0.937 ; -0.636 | Alta                    | 9       | (7-11)  | -                                                                                                                             |
| Tofacitinib 5 mg 2xSemana                                                                                                                                  | -0,717          | -1.004 ; -0.442 | Moderada                | 10      | (10-10) | a) Solo un estudio disponible.                                                                                                |
| Apremilast 30 mg                                                                                                                                           | -0,538          | -0.695 ; -0.368 | Moderada                | 13      | (11-14) | a) Riesgo de sesgo en 2 ECAs por dudas en el ocultamiento de la asignación y los métodos de aleatorización.                   |

| DMARDs biológicos y sintéticos comparados con placebo en el tratamiento de artritis psoriásica:<br>Respuesta PsARC a partir de metanálisis en red |                 |              |                         |         |         |                                                                                                                               |
|---------------------------------------------------------------------------------------------------------------------------------------------------|-----------------|--------------|-------------------------|---------|---------|-------------------------------------------------------------------------------------------------------------------------------|
| Medicamento:                                                                                                                                      | Efecto relativo | IC 95%       | Certeza de la evidencia | Ranking |         | Juicios                                                                                                                       |
| Golimumab 50 mg                                                                                                                                   | 10,15           | 5.74 ; 18.95 | Moderada                | 1       | (1-2)   | a) Solo un estudio disponible                                                                                                 |
| Infliximab 5 mg/kg c/8 semanas                                                                                                                    | 9,75            | 5.87 ; 17.16 | Moderada                | 2       | (1-2)   | a) Se combinó la información de seguimiento de 16 y 24 semanas                                                                |
| Etanercept 25 mg 2xSemana /50 1xSemana                                                                                                            | 7,54            | 4.40 ; 13.4  | Moderada                | 3       | (3-3)   | a) Solo un estudio disponible                                                                                                 |
| Certolizumab (todas las dosis)                                                                                                                    | 3,70            | 2.39 ; 5.60  | Moderada                | 4       | (4-5)   | a) Solo un estudio disponible por dosis                                                                                       |
| Secukinumab 150 mg c/4 semanas                                                                                                                    | 3,55            | 1.94 ; 6.67  | Alta                    | 5       | (4-6)   | -                                                                                                                             |
| Ixekizumab 80 mg c/2 semanas                                                                                                                      | 3,22            | 1.93 ; 5.42  | Moderada                | 6       | (6-7)   | a) Criterios de inclusión diferentes con pacientes que han recibido bDMARDs y no-respondedores.                               |
| Adalimumab 40 mg c/2 semanas                                                                                                                      | 3,03            | 2.24 ; 4.04  | Baja                    | 7       | (5-9)   | a) Riesgo de sesgo por dudas en el ocultamiento de la asignación y el método de aleatorización. b) Solo un estudio disponible |
| Secukinumab 300 mg c/4 semanas                                                                                                                    | 2,64            | 1.46 ; 4.74  | Moderada                | 8       | (7-9)   | a) Solo un estudio disponible                                                                                                 |
| Ixekizumab 80 mg c/4 semanas                                                                                                                      | 2,49            | 1.55 ; 4.09  | Moderada                | 9       | (8-9)   | a) Criterios de inclusión diferentes con pacientes que han recibido bDMARDs y no-respondedores.                               |
| Apremilast 30 mg                                                                                                                                  | 1,92            | 1.38 ; 2.59  | Moderada                | 10      | (10-11) | a) Riesgo de sesgo en 2 ECAs por dudas en el ocultamiento de la asignación y los métodos de aleatorización.                   |
| Tofacitinib 5 mg BID                                                                                                                              | 1,61            | 1.00 ; 2.64  | Moderada                | 11      | (10-11) | a) Solo un estudio disponible.                                                                                                |

| DMARDs biológicos y sintéticos comparados con placebo en el tratamiento de artritis psoriásica:<br>Frecuencia de eventos adversos serios a partir de metanálisis para cada medicamento |                         |                         |                             |                                        |                         |                                                                                                                                                                                           |
|----------------------------------------------------------------------------------------------------------------------------------------------------------------------------------------|-------------------------|-------------------------|-----------------------------|----------------------------------------|-------------------------|-------------------------------------------------------------------------------------------------------------------------------------------------------------------------------------------|
| Medicamento:                                                                                                                                                                           | Número de participantes | Efeca relativo (IC 95%) | Riesgo absoluto con placebo | Diferencia con la intervención         | Calidad de la evidencia | Juicios                                                                                                                                                                                   |
| Adalimumab 40 mg c/2 semanas                                                                                                                                                           | 313 (1 ECA)             | RR 1.50 (0.49 a 4.63)   | 31 por 1.000                | 15 más por 1.000 (16 menos a 112 más)  | Muy Baja                | a) Solo hay un estudio disponible. b) Las características clínicas de base no son claras. c) el IC 95% es impreciso, no es significativo y el efecto clínico es incierto.                 |
| Etanercept 25 mg 2xSemana                                                                                                                                                              | 205 (1 ECA)             | RR 1.03 (0.26 a 4.01)   | 38 por 1.000                | 1 más por 1.000 (28 menos a 116 más)   | Baja                    | a) Solo hay un estudio disponible. b) el IC 95% es impreciso, no es significativo y el efecto clínico es incierto.                                                                        |
| Golimumab 50mg c/ 4 sem                                                                                                                                                                | 259 (1 ECA)             | RR 0.33 (0.09 a 1.25)   | 62 por 1.000                | 42 menos por 1.000 (56 menos a 15 más) | Baja                    | a) Solo hay un estudio disponible. b) el IC 95% es impreciso y no es significativo.                                                                                                       |
| Golimumab 100 mg c/4 sem                                                                                                                                                               | 259 (1 ECA)             | RR 0.44 (0.13 a 1.47)   | 62 por 1.000                | 35 menos por 1.000 (54 menos a 29 más) | Baja                    | a) Solo hay un estudio disponible. b) el IC 95% es impreciso y no es significativo.                                                                                                       |
| Infliximab 5 mg/kg c/8 semanas                                                                                                                                                         | 103 (1 ECA)             | RR 0.98 (0.06 a 15.26)  | 20 por 1.000                | 0 menos por 1.000 (18 menos a 280 más) | Muy Baja                | a) Solo hay un estudio disponible. b) el IC 95% es impreciso y no es significativo. c) el estimado no sugiere una diferencia mínima clínicamente importante.                              |
| Ixekizumab 80 mg c/4 sem                                                                                                                                                               | 453 (2 ECAs)            | RR 1.43 (0.36 a 5.69)   | 27 por 1.000                | 12 más por 1.000 (17 menos a 126 más)  | Baja                    | a) Criterios de inclusión diferentes con pacientes que han recibido bDMARDs y no-respondedores. b) el IC95% es impreciso y no es significativo, por lo que es incierto si hay diferencia. |
| Ixekizumab 80 mg c/2 sem                                                                                                                                                               | 449 (2 ECAs)            | RR 1.80 (0.68 a 4.79)   | 27 por 1.000                | 21 más por 1.000 (9 menos a 102 más)   | Baja                    | a) la diferencia estimada tiene relevancia clínica incierta. b) el IC 95% es impreciso y no es significativo.                                                                             |
| Secukinumab 150 mg c/4 semanas                                                                                                                                                         | 602 (2 ECAs)            | RR 0.84 (0.37 a 1.91)   | 40 por 1.000                | 6 menos por 1.000 (25 menos a 36 más)  | Moderada                | a) el IC 95% es impreciso y no es significativo.                                                                                                                                          |
| Secukinumab 300 mg c/4 semanas                                                                                                                                                         | 198 (1 ECA)             | RR 2.45 (0.49 a 12.33)  | 20 por 1.000                | 30 más por 1.000 (10 menos a 231 más)  | Baja                    | a) Solo hay un estudio disponible. b) el IC 95% es impreciso y no es significativo.                                                                                                       |

## Referencias

1. IB M, Nash P, Ritchlin C, EH C, Kanters S, Thom H, et al. Secukinumab for psoriatic arthritis: comparative effectiveness versus licensed biologics/apremilast: a network meta-analysis. *J Comp Eff Res* [Internet]. 2018;7(11):1107–23. Available from: <http://www.epistemonikos.org/documents/77f6dddb4a9002993e26d9a70160bdedf51069a8>
2. GG S, YH L. Comparison of the Efficacy and Safety of Tofacitinib and Apremilast in Patients with Active Psoriatic Arthritis: A Bayesian Network Meta-Analysis of Randomized Controlled Trials. *Clin Drug Investig* [Internet]. 2019;39(5):421–8. Available from: <http://www.epistemonikos.org/documents/beb0ad29c6f9ad143b8cf70717bade806549b4c2>
3. G.G. S, Y.H. L. Relative efficacy and safety of apremilast, secukinumab, and ustekinumab for the treatment of psoriatic arthritis. *Z Rheumatol* [Internet]. 2018;77(7):1–8. Available from: <http://www.epistemonikos.org/documents/d8e78fce605016ac11f35e0804beca8697b0e1d5>
4. Kawalec P, Holko P, Moćko P, Pilc A. Comparative effectiveness of abatacept, apremilast, secukinumab and ustekinumab treatment of psoriatic arthritis: a systematic review and network meta-analysis. *Rheumatol Int* [Internet]. 2018;38(2):189–201. Available from: <http://dx.doi.org/10.1007/s00296-017-3919-7>
5. Cawson MR, Mitchell SA, Knight C, Wildey H, Spurden D, Bird A, et al. Systematic review, network meta-analysis and economic evaluation of biological therapy for the management of active psoriatic arthritis. *BMC Musculoskelet Disord*. 2014;15(1).
6. Ungprasert P, Thongprayoon C, Davis JM. Indirect comparisons of the efficacy of biological agents in patients with psoriatic arthritis with an inadequate response to traditional disease-modifying anti-rheumatic drugs or to non-steroidal anti-inflammatory drugs: A meta-analysis. *Semin Arthritis Rheum* [Internet]. 2016;45(4):428–38. Available from: <http://dx.doi.org/10.1016/j.semarthrit.2015.09.004>
7. Ruysen-Witrand A, Perry R, Watkins C, Braileanu G, Kumar G, Kiri S, et al. Efficacy and safety of biologics in psoriatic arthritis: a systematic literature review and network meta-analysis. *RMD open* [Internet]. 2020;6(1). Available from: <http://www.epistemonikos.org/documents/fa6413d4c27f0128c82d9d05efe9a2c436a88577>

## GPC para pacientes con Espondiloartritis Periférica ASOREUMA

8. Kingsley G, Scott D. Assessing the effectiveness of synthetic and biologic disease-modifying antirheumatic drugs in psoriatic arthritis & a systematic review. *Psoriasis Targets Ther*. 2015;71.
9. Dressler C, Eisert L, PA PT, Nast A. Efficacy and safety of systemic treatments in psoriatic arthritis. A systematic review, meta-analysis and GRADE evaluation. *J Eur Acad Dermatol Venereol* [Internet]. 2019;33(7):1249–60. Available from: <http://www.epistemonikos.org/documents/246ddd52624a1e2b26a0531eb7850f0a66c5b6e6>
10. Kerschbaumer A, JS S, Dougados M, M de W, Primdahl J, McInnes I, et al. Pharmacological treatment of psoriatic arthritis: a systematic literature research for the 2019 update of the EULAR recommendations for the management of psoriatic arthritis. *Ann Rheum Dis* [Internet]. 2020;79(6):778–86. Available from: <http://www.epistemonikos.org/documents/3cad9e1d73378c022e7a39a4028a0532c0862c7d>
11. Loft ND, Vaengebjerg S, Halling AS, Skov L, Egeberg A. Adverse events with IL-17 and IL-23 inhibitors for psoriasis and psoriatic arthritis: a systematic review and meta-analysis of phase III studies. *J Eur Acad Dermatology Venereol*. 2020;34(6):1151–60.
12. ND L, Vaengebjerg S, AS H-S, Skov L, Egeberg A. Adverse events with IL-17 and IL-23 inhibitors for psoriasis and psoriatic arthritis: a systematic review and meta-analysis of phase III studies. *J Eur Acad Dermatol Venereol* [Internet]. 2019;34(6):1151–60. Available from: <http://www.epistemonikos.org/documents/d6a29354c179d5a945e3e03f5d6ffde2cc531099>
13. Olivieri I, de Portu S, Salvarani C, Cauli A, Lubrano E, Spadaro A, et al. The psoriatic arthritis cost evaluation study: A cost-of-illness study on tumour necrosis factor inhibitors in psoriatic arthritis patients with inadequate response to conventional therapy. *Rheumatology*. 2008;47(11):1664–70.
14. Aiello E, Bianculi PM, Bhattacharyya D, Gunda P, Citera G. Cost-Effectiveness of Secukinumab Versus Other Biologics in the Treatment of Psoriatic Arthritis: An Argentinean Perspective. *Value Heal Reg Issues*. 2019;20:86–94.
15. Schweikert B, Storck C, Núñez M, Dilla T, Hartz S, Sapin C. Pmu66 - Cost-Effectiveness Analysis of Ixekizumab Versus Secukinumab in Patients With Psoriatic Arthritis and Concomitant Moderate-To-Severe Psoriasis in Spain. *Value Heal*. 2018;21:S319.
16. Mease PJ, Smolen JS, Behrens F The SPIRIT H2H study group, et al A head-to-head comparison of the efficacy and safety of ixekizumab and adalimumab in biological-naïve patients with active psoriatic arthritis: 24-week results of a

## GPC para pacientes con Espondiloartritis Periférica ASOREUMA

randomised, open-label, blinded-assessor trial *Annals of the Rheumatic Diseases* 2020;79:123-131.

17. McInnes IB, Behrens F, Mease PJ, Kavanaugh A, Ritchlin C, Nash P, Masmitja JG, Goupille P, Korotaeva T, Gottlieb AB, Martin R, Ding K, Pellet P, Mpofu S, Pricop L; EXCEED Study Group. Secukinumab versus adalimumab for treatment of active psoriatic arthritis (EXCEED): a double-blind, parallel-group, randomised, active-controlled, phase 3b trial. *Lancet*. 2020 May 9;395(10235):1496-1505. doi: 10.1016/S0140-6736(20)30564-X. Erratum in: *Lancet*. 2020 May 30;395(10238):1694. PMID: 32386593.

## GPC para pacientes con Espondiloartritis Periférica ASOREUMA

**Pregunta 4. ¿En pacientes adultos con Espondiloartritis Periférica y falla a primera línea con DMARDs Biológicos, cuál DMARD Biológico se debe usar como siguiente opción de tratamiento, considerando su efectividad en el control de la enfermedad y perfil de seguridad?**

|                     |                                                                                                                 |         |
|---------------------|-----------------------------------------------------------------------------------------------------------------|---------|
| <b>Población</b>    | Pacientes con espondiloartritis periférica que han fallado al tratamiento de primera línea con DMARD biológicos |         |
| <b>Intervención</b> | Segunda línea de tratamiento con Anti TNF, anti IL-17, Anti 12-23, inhibidores JAK anti                         |         |
| <b>Comparación</b>  | Segunda línea de tratamiento con Anti TNF, anti IL-17, Anti 12-23, inhibidores JAK                              |         |
| <b>Desenlaces</b>   | Control enfermedad- Remisión/baja actividad de síntomas                                                         | Crítico |
|                     | Control enfermedad- Mejoría en escalas de funcionalidad                                                         | Crítico |
|                     | Control enfermedad- progresión radiográfica                                                                     | Crítico |
|                     | calidad de vida                                                                                                 | Crítico |
|                     | Perfil de seguridad: Eventos adversos                                                                           | Crítico |

## Antecedentes

La espondiloartritis (EspA) es una enfermedad sistémica con múltiples presentaciones (1) que abarca la inflamación del esqueleto axial (EspAax), y/o síntomas extraarticulares como psoriasis, uveítis o inflamación enfermedad intestinal (EII) y también manifestaciones articulares periféricas (2). La espondiloartritis periférica (EspAp) se presenta principalmente con artritis, entesitis o dactilitis periférica, sin compromiso del esqueleto axial (3), su diagnóstico puede ser retador particularmente en la ausencia de manifestaciones extraarticulares como uveítis, psoriasis o enfermedad inflamatoria intestinal(2). La evaluación de la actividad de la enfermedad debe incluir la evaluación objetiva de la presencia de inflamación particularmente entesitis(4).

Las presentaciones clínicas típicas de afectación articular en la EspAp son artritis inflamatoria asimétrica, mono articular u oligoarticular (menos de cinco articulaciones) que involucra las extremidades inferiores con más frecuencia que las superiores; dentro de las formas de EspAp se encuentra la más frecuente, la artritis psoriásica (APs), también se encuentran la artritis reactiva y la EspAp indiferenciada (2).

## GPC para pacientes con Espondiloartritis Periférica ASOREUMA

En cuanto al tratamiento no existen recomendaciones estandarizadas para el tratamiento de la EspAp en general, sin embargo la liga europea contra el reumatismo EULAR (por sus siglas en inglés) ha emitido recomendaciones específicas para el tratamiento de APs (4).

Dada la heterogeneidad de esta patología el tratamiento no se puede agrupar ya que difieren en términos de pronóstico y resultado. En el caso de la artritis psoriásica (APs) la guía de la EULAR realizó recomendaciones en cuanto a las manifestaciones periféricas; el tratamiento de primera línea recomendado son los analgésicos no esteroideos (AINES)(5), los glucocorticoides también son administrados especialmente en bajas dosis(6). En cuanto a los DMARDs clásicos, estos han mostrado ser eficaces únicamente en el manejo de la artritis y han seguido históricamente el patrón de uso de la artritis reumatoidea, existe evidencia disponible para sulfasalazina, leflunomida y metotrexate con muestra de alguna efectividad en EspAp (7).

La decisión del tratamiento especialmente en los pacientes que presentan entesitis severa o dactilitis debe ser tomada de forma individual, existe un consenso sobre el uso de terapia biológica con anti TNF posterior a la falla de tratamiento con AINES y glucocorticoides como la terapia biológica de primera elección, también se recomienda el uso de otros bDMARDs como anti IL12/23 o IL17 en caso de que la terapia con anti TNF no sea indicada(4).

Existe una proporción de pacientes que presentan falla terapéutica a pesar de estar recibiendo terapia biológica indicada en las dosis indicadas. Aquí se revisa la evidencia sobre alternativas terapéuticas después del fallo de tratamiento con DMARDs biológicos de primera línea en el tratamiento de la espondiloartritis periférica con el fin de generar una recomendación sobre su uso en esta entidad.

### Efectividad

Para el caso de espondilo artritis periférica en general no se encontró evidencia que respondiera esta pregunta. Este protocolo se basa en la evidencia encontrada para el caso específico de artritis psoriásica.

### Cambio a un segundo anti TNF en pacientes que han fallado al tratamiento con un anti TNF

Para el efecto de esta comparación se identificaron los siguientes estudios:

El estudio de Conti et al publicado en el 2007 (8) de 5 años de duración es un estudio observacional retrospectivo que incluyó pacientes con diagnóstico de APs según los criterios de Moll y Wright que hubieran recibido terapia con anti - TNF con un mínimo

## GPC para pacientes con Espondiloartritis Periférica ASOREUMA

de 6 meses de seguimiento, la elección del biológico fue basada solo en consideraciones médicas por lo que se consideró estos pacientes representaban una muestra de vida real de pacientes tratados con anti TNF. Los medicamentos recibidos fueron Infliximab 3–5 mg/kg fue administrado por vía intravenosa en las semanas 0, 2 y 6 y luego cada 6 a 8 semanas; etanercept (25 mg dos veces a la semana) y adalimumab (40 mg alternado semanalmente) dados de forma subcutáneo. De todos los pacientes estudiados 15 presentaron APs y recibieron un anti-TNF previo. Se evaluó la mejoría clínica con más del 50% de repuesta con los criterios de respuesta de artritis psoriásica (PsARC por sus siglas en inglés).

Un estudio observacional retrospectivo realizado por Paccou et al en el año 2011(9) que evaluó la respuesta terapéutica de un segundo o tercer anti TNF después de la falla terapéutica a un anti TNF previamente, este estudio tuvo una duración de 8 años, incluyó pacientes con diagnóstico de espondiloartritis axial o periférica que cumplieran con los criterios diagnósticos establecidos según fuera el caso, los pacientes eran clasificados como EspAax o periférica dependiendo de cuales manifestaciones predominaran. Los anti – TNF utilizados fueron infliximab (5 mg/kg cada 6 semanas), adalimumab (40mg cada 14 días) y etanercept (25mg dos veces a la semana 50 mg/semanal). En las formas periféricas el tratamiento fue considerado efectivo si el paciente presentaba una opinión favorable del experto o si presentaba una mejoría clínica > 30% en el conteo de articulaciones inflamadas y dolorosas. Los pacientes que suspendieron la terapia anti – TNF antes del tiempo de evaluación programada de 3 meses por efectos adversos se registraron los cambios en las articulaciones inflamadas y dolorosas. De todo el registro de pacientes para el primer análisis de cambio a un segundo anti TNF se incluyeron 99 pacientes, de estos 28 recibieron un tercer anti – TNF. La secuencia de tratamiento más frecuente fue cambio de etanercept a adalimumab (31 veces), seguido de infliximab a etanercept (25 veces) y el cambio de etanercept a infliximab (22 veces). Las manifestaciones periféricas predominantes se encontraron en 24 pacientes, información sobre articulaciones inflamadas y dolorosas solo estaba disponible para 11 pacientes, pero antes del cambio de anti TNF sólo estaba disponible para 6 pacientes.

*Control enfermedad por remisión/baja actividad de síntomas*

En el estudio de Conti (8) 10 pacientes APs cambiaron de infliximab a etanercept la proporción de respuesta posterior a 3 meses del cambio aumentó del 10% a 70%. Siete pacientes cambiaron de etanercept a adalimumab la proporción de respondedores cambió de PsARC 14.3% a 57.1%. La calidad global de la evidencia es muy baja por el tipo de estudio la imprecisión de los resultados.

En el estudio de Paccou (9) para las formas periféricas 83,3% 20/24 respondieron al tratamiento basado en la opinión de expertos. 54,5% (6/11) vs 83,3% (5/6) basados

## GPC para pacientes con Espondiloartritis Periférica ASOREUMA

en la mejoría clínica de >30% del conteo de articulaciones inflamadas y dolorosas. La mediana (RIQ) de conteo de articulaciones inflamadas fue de 3 (1-6) inicialmente y disminuyó a 0 (0-2) 3 meses posterior al cambio, no se presentó diferencias estadísticamente significativas ( $P = 0,14$ ). La mediana (RIQ) de articulaciones dolorosas fue de 7 (3-16) inicialmente y disminuyó a 2 (0-7) 3 meses después del cambio de tratamiento, no se presentó diferencias estadísticamente significativas ( $P = 0,24$ ). La calidad global de la evidencia es muy baja por el tipo de estudio la imprecisión de los resultados.

### *Eventos adversos serios y no serios*

Los estudios no reportan sobre EAS.

### **Cambio a un segundo biológico diferente a anti – TNF posterior a la falla de un primer biológico.**

Se identificó un ECA realizado por Ritchlin et al en el año 2014 (10) que se encuentra dentro del grupo de estudio PSUMMIT 2 con una duración de 52 semanas, que incluyó pacientes con APs activa (tener artritis psoriásica por los criterios de CASPAR y  $\geq 5/66$  articulaciones inflamadas,  $\geq 5/68$  articulaciones dolorosas, PCR  $\geq 6.0$  mg/L modificada a  $\geq 3.0$  mg/L después del inicio del estudio e historia documentada de placa activa de psoriasis) durante más de 6 meses a pesar de terapia con DMARDS  $\geq 3$  meses,  $\geq 4$  semanas de AINES y/o  $\geq 8$  semanas de etanercept, adalimumab, golimumab, certolizumab pegol o 14 semanas continuas de infliximab o menos tiempo si el paciente presentó intolerancia a anti – TNF; del total de la muestra 180 pacientes tuvieron tratamiento previo con anti TNF. Los pacientes se aleatorizaron a recibir ustekinumab (UST) 45 mg, 90 mg o placebo en la semana 0, semana 4 y cada 12 semanas posteriormente de una forma estratificada por lugar, peso y consumo de metotrexate. Se midió efectividad clínica por medio de los criterios de respuesta del Colegio American de reumatología (ACR por sus siglas en inglés), DAS28-PCR y el índice de severidad y área de psoriasis (PASI por sus siglas en inglés). Se midió funcionalidad física con el índice de discapacidad cuestionario de evaluación de salud (HAQ-DI por sus siglas en inglés).

### *Control enfermedad por remisión/baja actividad de síntomas*

El estudio de Ritchlin (10) para el grupo de anti TNF previo se observó una mejoría a la semana 24 mejoría en ARC20 de UST 42/118 (35,6%) vs 9/62 (14,5%) placebo  $p < 0,01$ . RR 2,45 (IC 95% 1,31;4,58). La calidad de la evidencia fue alta.

### *Mejoría en escalas de funcionalidad*

A la semana 24 el cambio de puntaje en la escala de HAQ-DI fue de  $-0.13$  ( $-0.38$  a  $0.00$ ) para UST vs  $0.00$  ( $-0,13$  a  $0,3$ ) para placebo  $p < 0.05$ . No se alcanzó la diferencia

## GPC para pacientes con Espondiloartritis Periférica ASOREUMA

clínicamente significativa para esta escala que es de -0,3 puntos. La calidad de la evidencia fue alta.

### *Eventos adversos serios y no serios*

En cuanto a eventos adversos agrupando todos los pacientes antes de la terapia de escalonamiento a la semana 16 se presentaron 128/207 (61,8%) en el grupo de UST vs 57/104 (54,8%) en el grupo placebo, RR 1,13 (IC95% 0,9;1,41). Para infecciones se encontró 56/207 (27,1%) en el grupo UST vs 25/104 (24%) en el grupo placebo, RR 1,13 (IC95% 0,65;1,97).

## **Valores y preferencia de pacientes**

Las búsquedas exhaustivas encaminadas a identificar estudios sobre este aspecto no identificaron estudios en los que se haya medido o valorado la preferencia de los pacientes ante el cambio de tratamiento a una segunda línea.

## **Costos**

Se identificó una evaluación económica de costo- efectividad realizada por el National Institute for Clinical Excellence (NICE) del Reino Unido en 2017 (11) con el fin de determinar la costo-efectividad de Certolizumab pegol y secukinumab para artritis psoriásica posterior al tratamiento con DMARDS en pacientes con o sin terapia biológica previa. Los pacientes con terapia biológica previa recibieron un anti TNF o UST. Este análisis económico fue calificado como de buena calidad según criterios de evaluación de Drummond (anexo Excel).

Para la población de interés de la pregunta actual (población que ha sido tratada con terapia biológica previamente), el ICER para secukinumab comparado con la terapia convencional fue de £36.013 por QALY, en el análisis completo incremental, el ICER para UST vs terapia convencional fue de £21.684 por QALY por lo que se concluyó que el secukinumab y certolizumab no podría considerarse rentable para las personas con EA que han sido tratadas previamente con inhibidores de TNF-alfa o UST y DMARDS (11).

**Pregunta 4: Marco de trabajo –De la evidencia a las decisiones**

| <b>PREGUNTA</b>               |                                                                                                                        |
|-------------------------------|------------------------------------------------------------------------------------------------------------------------|
| <b>POBLACION</b>              | <i>Pacientes con espondiloartritis periférica que han fallado al tratamiento de primera línea con DMARD biológicos</i> |
| <b>INTERVENCIÓN</b>           | <i>Segunda línea (otro DMARD biológico) con Anti TNF, anti IL-17, Anti 12-23, inhibidores JAK</i>                      |
| <b>COMPARACIÓN</b>            | <i>Segunda línea (otro DMARD biológico) con Anti TNF, anti IL-17, Anti 12-23, inhibidores JAK</i>                      |
| <b>DESENLACES PRINCIPALES</b> | <i>Control de la enfermedad<br/>Calidad de Vida<br/>Seguridad-Perfil de eventos adversos</i>                           |
| <b>ÁMBITO</b>                 | <i>Ambulatorio</i>                                                                                                     |
| <b>PERSPECTIVA</b>            | <i>Recomendación de GPC en el contexto de espondiloartritis</i>                                                        |
| <b>CONFLICTO DE INTERÉS:</b>  | <i>No hay ninguna declaración de conflictos de interés</i>                                                             |

**Evaluación**

| <b>Problema</b><br>Es el problema una prioridad? |                                      |                                    |
|--------------------------------------------------|--------------------------------------|------------------------------------|
| <b>JUICIO</b>                                    | <b>EVIDENCIA DE LA INVESTIGACION</b> | <b>CONSIDERACIONES ADICIONALES</b> |

|                                                                                                                                                                             |                                                                                                                                                                                                                                                                                                                                                                                                                                                                                                                                                                                                                                                                                                                                                                                                                                                                                                                                                                                                                                                                                                                                                                                                                                                                                                                                                                                                                                                                                                                                                                                                                                                                                                |  |
|-----------------------------------------------------------------------------------------------------------------------------------------------------------------------------|------------------------------------------------------------------------------------------------------------------------------------------------------------------------------------------------------------------------------------------------------------------------------------------------------------------------------------------------------------------------------------------------------------------------------------------------------------------------------------------------------------------------------------------------------------------------------------------------------------------------------------------------------------------------------------------------------------------------------------------------------------------------------------------------------------------------------------------------------------------------------------------------------------------------------------------------------------------------------------------------------------------------------------------------------------------------------------------------------------------------------------------------------------------------------------------------------------------------------------------------------------------------------------------------------------------------------------------------------------------------------------------------------------------------------------------------------------------------------------------------------------------------------------------------------------------------------------------------------------------------------------------------------------------------------------------------|--|
| <ul style="list-style-type: none"> <li>○ No</li> <li>○ Probablemente No</li> <li>○ Probablemente Si</li> <li>○ Si</li> <li>○ Es variable</li> <li>○ No se conoce</li> </ul> | <p>La espondiloartritis (EspA) es una enfermedad sistémica con múltiples presentaciones (1) que abarca la inflamación del esqueleto axial (EspAax), y/o síntomas extraarticulares como psoriasis, uveítis o inflamación enfermedad intestinal (EII) y también manifestaciones articulares periféricas (2). La espondiloartritis periférica (EspAp) se presenta principalmente con artritis, entesitis o dactilitis periférica, sin compromiso del esqueleto axial (3), su diagnóstico puede ser retador particularmente en la ausencia de manifestaciones extraarticulares como uveítis, psoriasis o enfermedad inflamatoria intestinal(2). La evaluación de la actividad de la enfermedad debe incluir la evaluación objetiva de la presencia de inflamación particularmente entesitis(4).</p> <p>La decisión del tratamiento especialmente en los pacientes que presentan entesitis severa o dactilitis debe ser tomada de forma individual, existe un consenso sobre el uso de terapia biológica con anti TNF posterior a la falla de tratamiento con AINES y glucocorticoides como la terapia biológica de primera elección, también se recomienda el uso de otros bDMARDS como anti IL12/23 o IL17 en caso de que la terapia con anti TNF no sea indicada(4).</p> <p>Existe una proporción de pacientes que presentan falla terapéutica a pesar de estar recibiendo terapia biológica indicada en las dosis indicadas. Aquí se revisa la evidencia sobre alternativas terapéuticas después del fallo de tratamiento con DMARDs biológicos de primera línea en el tratamiento de la espondiloartritis periférica con el fin de generar una recomendación sobre su uso en esta entidad.</p> |  |
|-----------------------------------------------------------------------------------------------------------------------------------------------------------------------------|------------------------------------------------------------------------------------------------------------------------------------------------------------------------------------------------------------------------------------------------------------------------------------------------------------------------------------------------------------------------------------------------------------------------------------------------------------------------------------------------------------------------------------------------------------------------------------------------------------------------------------------------------------------------------------------------------------------------------------------------------------------------------------------------------------------------------------------------------------------------------------------------------------------------------------------------------------------------------------------------------------------------------------------------------------------------------------------------------------------------------------------------------------------------------------------------------------------------------------------------------------------------------------------------------------------------------------------------------------------------------------------------------------------------------------------------------------------------------------------------------------------------------------------------------------------------------------------------------------------------------------------------------------------------------------------------|--|

### Efectos deseables (beneficios de la opción a recomendar)

¿Qué tan sustanciales son los efectos deseables de la opción?

| JUICIO                                                                                                                                      | EVIDENCIA DE LA INVESTIGACION      | CONSIDERACIONES ADICIONALES |
|---------------------------------------------------------------------------------------------------------------------------------------------|------------------------------------|-----------------------------|
| <ul style="list-style-type: none"> <li>○ Triviales</li> <li>○ Pequeños</li> <li>○ Moderados</li> <li>○ Grandes</li> <li>○ Varían</li> </ul> | <b>Cambio de un anti TNF a UST</b> |                             |

| ○ No se sabe                                                                                                              | <table><tr><th>Desenlaces</th><th>Nº de participantes (estudios)</th><th>Certeza de la evidencia (GRADE)</th><th>Efecto relativo (95% CI)</th></tr><tr><td>Respuesta terapuetica-ASAS20</td><td>1 ECAs (180)</td><td>Alta</td><td>Risk ratio 2,45 ( 1,31;4,58)</td></tr></table> |                                 |                                   |                          | Desenlaces                         | Nº de participantes (estudios) | Certeza de la evidencia (GRADE) | Efecto relativo (95% CI) | Respuesta terapuetica-ASAS20 | 1 ECAs (180) | Alta | Risk ratio 2,45 ( 1,31;4,58)      |  |
|---------------------------------------------------------------------------------------------------------------------------|----------------------------------------------------------------------------------------------------------------------------------------------------------------------------------------------------------------------------------------------------------------------------------|---------------------------------|-----------------------------------|--------------------------|------------------------------------|--------------------------------|---------------------------------|--------------------------|------------------------------|--------------|------|-----------------------------------|--|
|                                                                                                                           | Desenlaces                                                                                                                                                                                                                                                                       | Nº de participantes (estudios)  | Certeza de la evidencia (GRADE)   | Efecto relativo (95% CI) |                                    |                                |                                 |                          |                              |              |      |                                   |  |
| Respuesta terapuetica-ASAS20                                                                                              | 1 ECAs (180)                                                                                                                                                                                                                                                                     | Alta                            | Risk ratio 2,45 ( 1,31;4,58)      |                          |                                    |                                |                                 |                          |                              |              |      |                                   |  |
| <b>Efectos Indeseables</b><br>¿Qué tan sustanciales son los efectos indeseables que se pueden anticipar?                  |                                                                                                                                                                                                                                                                                  |                                 |                                   |                          |                                    |                                |                                 |                          |                              |              |      |                                   |  |
| <b>JUICIO</b>                                                                                                             | <b>EVIDENCIA DE LA INVESTIGACION</b>                                                                                                                                                                                                                                             |                                 |                                   |                          | <b>CONSIDERACIONES ADICIONALES</b> |                                |                                 |                          |                              |              |      |                                   |  |
| ○ Triviales<br>○ Pequeños<br>○ Moderados<br>○ Grandes<br>○ Varían<br>○ No se sabe                                         | No hubo diferencias entre los pacientes expuestos al UST a dos diferentes dosis vs el placebo.                                                                                                                                                                                   |                                 |                                   |                          |                                    |                                |                                 |                          |                              |              |      |                                   |  |
|                                                                                                                           | <table><tr><th>Desenlaces</th><th>Nº de participantes (estudios)</th><th>Certeza de la evidencia (GRADE)</th><th>Efecto relativo (95% CI)</th></tr><tr><td>Eventos adversos</td><td>1 ECAs (411)</td><td>Alta</td><td>Risk ratio 1,13 (IC95% 0,9;1,41).</td></tr></table>        |                                 |                                   |                          | Desenlaces                         | Nº de participantes (estudios) | Certeza de la evidencia (GRADE) | Efecto relativo (95% CI) | Eventos adversos             | 1 ECAs (411) | Alta | Risk ratio 1,13 (IC95% 0,9;1,41). |  |
| Desenlaces                                                                                                                | Nº de participantes (estudios)                                                                                                                                                                                                                                                   | Certeza de la evidencia (GRADE) | Efecto relativo (95% CI)          |                          |                                    |                                |                                 |                          |                              |              |      |                                   |  |
| Eventos adversos                                                                                                          | 1 ECAs (411)                                                                                                                                                                                                                                                                     | Alta                            | Risk ratio 1,13 (IC95% 0,9;1,41). |                          |                                    |                                |                                 |                          |                              |              |      |                                   |  |
| <b>Certeza en la Evidencia</b><br>¿Cuál es la certeza en la evidencia global sobre los efectos de la opción a recomendar? |                                                                                                                                                                                                                                                                                  |                                 |                                   |                          |                                    |                                |                                 |                          |                              |              |      |                                   |  |
| <b>JUICIO</b>                                                                                                             | <b>EVIDENCIA DE LA INVESTIGACION</b>                                                                                                                                                                                                                                             |                                 |                                   |                          | <b>CONSIDERACIONES ADICIONALES</b> |                                |                                 |                          |                              |              |      |                                   |  |

| <ul style="list-style-type: none"><li>○ Muy baja</li><li>○ Baja</li><li>○ Moderada</li><li>○ Alta</li><li>○ No se identificaron estudios</li></ul>           | <p>Solo se identificó un estudio ECA de buena calidad como evidencia parcialmente indirecta ya que evalúa pacientes con artritis psoriásica y falla terapéutica.</p> <table><thead><tr><th>Desenlaces</th><th>Importancia relativa</th><th>Certeza de la evidencia (GRADE)</th></tr></thead><tbody><tr><td>Control enfermedad por remisión/baja actividad de síntomas ASAS 20</td><td>CRITICAL</td><td>⊕⊕⊕○<br/>Moderada</td></tr><tr><td>Eventos adversos</td><td>CRITICAL</td><td>⊕⊕⊕⊕<br/>ALTA</td></tr></tbody></table> |                                 |                                    | Desenlaces | Importancia relativa | Certeza de la evidencia (GRADE) | Control enfermedad por remisión/baja actividad de síntomas ASAS 20 | CRITICAL | ⊕⊕⊕○<br>Moderada | Eventos adversos | CRITICAL | ⊕⊕⊕⊕<br>ALTA | <p>no existe un estudio único que evalúa efectividad y/o efectividad de las diferentes terapias en los pacientes con espondiloartritis periféricas, los estudios son muy heterogéneos y el grupo de biológicos disponibles es un gran grupo con poca evidencia en el caso de falla terapéutica la certeza en la evidencia es moderada teniendo en cuenta que en cuanto a cambio de un anti TNF a otro anti_TNF hay estudios retrospectivos observacionales que unen en conjunto espondiloartritis axial y periférica y el grupo de pacientes al final es muy poco para espondiloartritis periféricas.</p> |
|--------------------------------------------------------------------------------------------------------------------------------------------------------------|-----------------------------------------------------------------------------------------------------------------------------------------------------------------------------------------------------------------------------------------------------------------------------------------------------------------------------------------------------------------------------------------------------------------------------------------------------------------------------------------------------------------------------|---------------------------------|------------------------------------|------------|----------------------|---------------------------------|--------------------------------------------------------------------|----------|------------------|------------------|----------|--------------|-----------------------------------------------------------------------------------------------------------------------------------------------------------------------------------------------------------------------------------------------------------------------------------------------------------------------------------------------------------------------------------------------------------------------------------------------------------------------------------------------------------------------------------------------------------------------------------------------------------|
| Desenlaces                                                                                                                                                   | Importancia relativa                                                                                                                                                                                                                                                                                                                                                                                                                                                                                                        | Certeza de la evidencia (GRADE) |                                    |            |                      |                                 |                                                                    |          |                  |                  |          |              |                                                                                                                                                                                                                                                                                                                                                                                                                                                                                                                                                                                                           |
| Control enfermedad por remisión/baja actividad de síntomas ASAS 20                                                                                           | CRITICAL                                                                                                                                                                                                                                                                                                                                                                                                                                                                                                                    | ⊕⊕⊕○<br>Moderada                |                                    |            |                      |                                 |                                                                    |          |                  |                  |          |              |                                                                                                                                                                                                                                                                                                                                                                                                                                                                                                                                                                                                           |
| Eventos adversos                                                                                                                                             | CRITICAL                                                                                                                                                                                                                                                                                                                                                                                                                                                                                                                    | ⊕⊕⊕⊕<br>ALTA                    |                                    |            |                      |                                 |                                                                    |          |                  |                  |          |              |                                                                                                                                                                                                                                                                                                                                                                                                                                                                                                                                                                                                           |
| <b>Valores de los pacientes</b>                                                                                                                              |                                                                                                                                                                                                                                                                                                                                                                                                                                                                                                                             |                                 |                                    |            |                      |                                 |                                                                    |          |                  |                  |          |              |                                                                                                                                                                                                                                                                                                                                                                                                                                                                                                                                                                                                           |
| ¿Hay variación o poca certeza sobre cómo valoran las personas/los pacientes los desenlaces principales?                                                      |                                                                                                                                                                                                                                                                                                                                                                                                                                                                                                                             |                                 |                                    |            |                      |                                 |                                                                    |          |                  |                  |          |              |                                                                                                                                                                                                                                                                                                                                                                                                                                                                                                                                                                                                           |
| <b>JUICIO</b>                                                                                                                                                | <b>EVIDENCIA DE LA INVESTIGACION</b>                                                                                                                                                                                                                                                                                                                                                                                                                                                                                        |                                 | <b>CONSIDERACIONES ADICIONALES</b> |            |                      |                                 |                                                                    |          |                  |                  |          |              |                                                                                                                                                                                                                                                                                                                                                                                                                                                                                                                                                                                                           |
| <ul style="list-style-type: none"><li>○ Variabilidad o incertidumbre importante</li><li>○ Posiblemente hay variabilidad o incertidumbre importante</li></ul> | No se encontró evidencia que responda esta pregunta                                                                                                                                                                                                                                                                                                                                                                                                                                                                         |                                 |                                    |            |                      |                                 |                                                                    |          |                  |                  |          |              |                                                                                                                                                                                                                                                                                                                                                                                                                                                                                                                                                                                                           |

|                                                                                                                                                                                                                                                                                                                       |                                                                                                           |                                    |
|-----------------------------------------------------------------------------------------------------------------------------------------------------------------------------------------------------------------------------------------------------------------------------------------------------------------------|-----------------------------------------------------------------------------------------------------------|------------------------------------|
| <ul style="list-style-type: none"> <li>○ Posiblemente No hay variabilidad o incertidumbre importante</li> <li>○ No hay variabilidad o incertidumbre importante</li> </ul>                                                                                                                                             |                                                                                                           |                                    |
| <b>Balance de los efectos</b><br>¿El balance entre los efectos deseables e indeseables favorece la opción o el comparador?                                                                                                                                                                                            |                                                                                                           |                                    |
| <b>JUICIO</b>                                                                                                                                                                                                                                                                                                         | <b>EVIDENCIA DE LA INVESTIGACION</b>                                                                      | <b>CONSIDERACIONES ADICIONALES</b> |
| <ul style="list-style-type: none"> <li>○ Favorece al comparador</li> <li>○ Probablemente favorece al comparador</li> <li>○ No favorece al comparador ni a la opción en evaluación</li> <li>○ Probablemente favorece a la opción</li> <li>○ Favorece la intervención</li> <li>○ Varía</li> <li>○ No se sabe</li> </ul> | Se considera que el balance entre los efectos deseables e indeseables favorece el uso de la intervención. |                                    |

| Recursos requeridos<br>Qué tan grande es el requerimiento de recursos (costos)?                                                                                                                                                                         |                                                                                                                                                                                                                                                                                                                                                                                                                                                                                                                                                                                                                                                                                                                                                                                                                                                                                                                                                                                                                                                                                                  |                             |
|---------------------------------------------------------------------------------------------------------------------------------------------------------------------------------------------------------------------------------------------------------|--------------------------------------------------------------------------------------------------------------------------------------------------------------------------------------------------------------------------------------------------------------------------------------------------------------------------------------------------------------------------------------------------------------------------------------------------------------------------------------------------------------------------------------------------------------------------------------------------------------------------------------------------------------------------------------------------------------------------------------------------------------------------------------------------------------------------------------------------------------------------------------------------------------------------------------------------------------------------------------------------------------------------------------------------------------------------------------------------|-----------------------------|
| JUICIO                                                                                                                                                                                                                                                  | EVIDENCIA DE LA INVESTIGACION                                                                                                                                                                                                                                                                                                                                                                                                                                                                                                                                                                                                                                                                                                                                                                                                                                                                                                                                                                                                                                                                    | CONSIDERACIONES ADICIONALES |
| <ul style="list-style-type: none"> <li>○ Grandes costos</li> <li>○ Costos moderados</li> <li>○ no significantes</li> <li>○ costos ni ahorros</li> <li>○ Moderados ahorros</li> <li>○ Grandes ahorros</li> <li>○ Varían</li> <li>○ No se sabe</li> </ul> | <p>Se identificó una evaluación económica de costo- efectividad realizada por el National Institutute for Clinical Excellence (NICE) del Reino Unido en 2017 (11) con el fin de determinar la costo-efectividad de Certolizumab pegol y secukinumab para artritis psoriásica posterior al tratamiento con DMARDS en pacientes con o sin terapia biológica previa. Los pacientes con terapia biológica previa recibieron un anti TNF o UST. Este análisis económico fue calificado como de buena calidad según criterios de evaluación de Drummond (anexo Excel).</p> <p>Para la población de interés de la pregunta actual (población que ha sido tratada con terapia biológica previamente), el ICER para secukinumab comparado con la terapia convencional fue de £36.013 por QALY, en el análisis completo incremental, el ICER para UST vs terapia convencional fue de £21.684 por QALY por lo que se concluyó que el secukinumab y certolizumab no podría considerarse rentable para las personas con EA han sido tratadas previamente con inhibidores de TNF-alfa o UST y DMARDS (11).</p> |                             |

| Equidad<br>¿La implementación de la opción, tendrá impacto en la equidad?                                                         |                                                                                                                 |                                                                                                                                                                            |
|-----------------------------------------------------------------------------------------------------------------------------------|-----------------------------------------------------------------------------------------------------------------|----------------------------------------------------------------------------------------------------------------------------------------------------------------------------|
| JUICIO                                                                                                                            | EVIDENCIA DE LA INVESTIGACION                                                                                   | CONSIDERACIONES ADICIONALES                                                                                                                                                |
| <ul style="list-style-type: none"> <li>○ Reduce</li> <li>○ Probablemente se reduce la equidad</li> <li>○ Probablemente</li> </ul> | <p>Los estudios evaluados no realizan un analisis de impacto de estas terapias en las inequidades en salud.</p> | <p>Se anticipa que ,dado el alto costo de los DMARDS biológicos y su falta de disponibilidad en todos los servicios de salud del país, la recomendación de su uso como</p> |

|                                                                                                              |                                                                                                                                                             |                                                                                                                                                                                                                                                                                                                                                                  |
|--------------------------------------------------------------------------------------------------------------|-------------------------------------------------------------------------------------------------------------------------------------------------------------|------------------------------------------------------------------------------------------------------------------------------------------------------------------------------------------------------------------------------------------------------------------------------------------------------------------------------------------------------------------|
| no impacta la equidad<br>○ Probablemente incrementa<br>○ Incrementa<br>○ Varía<br>○ No se sabe               |                                                                                                                                                             | terapia de segunda línea puede aumentar las brechas de inequidad en salud.                                                                                                                                                                                                                                                                                       |
| <b>Aceptabilidad</b><br>¿Es la opción aceptada por los diferentes actores involucrados en su implementación? |                                                                                                                                                             |                                                                                                                                                                                                                                                                                                                                                                  |
| <b>JUICIO</b>                                                                                                | <b>EVIDENCIA DE LA INVESTIGACION</b>                                                                                                                        | <b>CONSIDERACIONES ADICIONALES</b>                                                                                                                                                                                                                                                                                                                               |
| ○ No<br>○ Probablemente no<br>○ Probablemente si<br>○ Si<br>○ Varía<br>○ No se sabe                          | No se identificaron estudios de aceptabilidad de los implicados en el cuidado de los pacientes con espondiloartritis respecto al uso de estos medicamentos. | La guía EULAR recomienda en caso de que una terapia con anti TNF falle cambiar a otro anti TNF o a otras terapias biológicas. Dado que otras sociedades científicas de reconocido impacto como EULAR lo recomiendan, es altamente probable que los clínicos y demás personas que cuidan de estos pacientes en el país los acepten como terapia de segunda línea. |
| <b>Factibilidad</b><br>¿Es la opción factible de IMPLEMENTAR?                                                |                                                                                                                                                             |                                                                                                                                                                                                                                                                                                                                                                  |
| <b>JUICIO</b>                                                                                                | <b>EVIDENCIA DE LA INVESTIGACION</b>                                                                                                                        | <b>CONSIDERACIONES ADICIONALES</b>                                                                                                                                                                                                                                                                                                                               |

|                                                                                                                                                                                                  |                                             |                                                                                                                                                        |
|--------------------------------------------------------------------------------------------------------------------------------------------------------------------------------------------------|---------------------------------------------|--------------------------------------------------------------------------------------------------------------------------------------------------------|
| No<br><input type="radio"/> Probablemente no<br><input type="radio"/> Probablemente si<br><input type="radio"/> Si<br><input type="radio"/> Varía<br><input checked="" type="radio"/> No se sabe | No se encontraron estudios de factibilidad. | La opción se considera factible de implementar dada la disponibilidad de estos medicamentos en el país y su cobertura en los planes actuales de salud. |
|--------------------------------------------------------------------------------------------------------------------------------------------------------------------------------------------------|---------------------------------------------|--------------------------------------------------------------------------------------------------------------------------------------------------------|

## Resumen de Juicios

|                         | JUICIOS                                 |                                                      |                                                          |                                            |                          |       |                     |
|-------------------------|-----------------------------------------|------------------------------------------------------|----------------------------------------------------------|--------------------------------------------|--------------------------|-------|---------------------|
| PROBLEMA                | No                                      | Probablemente no                                     | Probablemente si                                         | Si                                         |                          | Varia | No se sabe          |
| EFFECTOS DESEABLES      | Triviales                               | Pequeños                                             | Moderados                                                | Grandes                                    |                          | Varia | No se sabe          |
| EFFECTOS INDESEABLES    | Grandes                                 | Moderados                                            | Pequeños                                                 | Triviales                                  |                          | Varia | No se sabe          |
| CERTEZA EN LA EVIDENCIA | Muy Baja                                | Baja                                                 | Moderada                                                 | Alta                                       |                          |       | No incluyó estudios |
| VALORES DE PACIENTES    | Importante incertidumbre o variabilidad | Posiblemente Importante incertidumbre o variabilidad | Probablemente No Importante incertidumbre o variabilidad | No Importante incertidumbre o variabilidad |                          |       |                     |
| BALANCE DE LOS EFECTOS  | Favorece el comparador                  | Probablemente Favorece el comparador                 | No favorece Ni la intervención ni el comparador          | Probablemente favorece la intervención     | Favorece la intervención | Varia | No se sabe          |

|                     | JUICIOS        |                        |                                  |                            |                 |       |            |
|---------------------|----------------|------------------------|----------------------------------|----------------------------|-----------------|-------|------------|
| RECURSOS REQUERIDOS | Grandes costos | Moderados costos       | Costos y ahorros insignificantes | Moderados ahorros          | Grandes ahorros | Varia | No se sabe |
| EQUIDAD             | Reducida       | Probablemente reducida | Probablemente no impactada       | Probablemente incrementada | Incrementada    | Varia | No se sabe |
| ACEPTABILIDAD       | No             | Probablemente No       | Probablemente Si                 | Si                         |                 | Varia | No se sabe |
| FACTIBILIDAD        | No             | Probablemente No       | Probablemente Si                 | Si                         |                 | Varia | No se sabe |

### Tipo de Recomendación

|                                                  |                                                       |                                                                                |                                                            |                                                |
|--------------------------------------------------|-------------------------------------------------------|--------------------------------------------------------------------------------|------------------------------------------------------------|------------------------------------------------|
| Recomendación fuerte en contra de la opción<br>○ | Recomendación condicional en contra de la opción<br>○ | Recomendación condicional a favor de cualquiera la opción o su comparador<br>○ | <b>Recomendación condicional a favor de la opción</b><br>X | Recomendación fuerte a favor de la opción<br>○ |
|--------------------------------------------------|-------------------------------------------------------|--------------------------------------------------------------------------------|------------------------------------------------------------|------------------------------------------------|

### Conclusiones

#### Recomendación

En pacientes adultos con Espondiloartritis Periférica- artritis psoriásica- y falla a primera línea con DMARDs Biológicos (bDMARDs) se sugiere usar como siguiente opción de tratamiento otro bDMARD (ya sea del mismo o diferente mecanismo de acción) o a un inhibidor JAK  
Recomendación condicional a favor de la intervención. Certeza en la evidencia Moderada

#### Justificación

El panel consideró que, a pesar del balance de efectos favorable hacia el tratamiento con otro bDMARD, la evidencia encontrada sólo aplica a artritis psoriásica, es variable, no se cuenta evidencia sobre todas las posibles comparaciones y algunas provienen de análisis de subgrupos con un número bajo de participantes, aunque en todos los casos los análisis de seguridad de las terapias evaluadas son adecuados.

Adicionalmente en los estudios pivotaes de ustekinumab y secukinumab muchos pacientes fueron tratados previamente con anti TNF con tasas de respuesta adecuada.

#### Consideraciones por subgrupos

No se identifican como necesarias.

Nota del panel: De acuerdo, con la conclusión, se entiende que no hay datos en el caso de inhibidores JAK, por eso no se incluyeron estudios en esta revisión – sin embargo se podría extender la conclusión a esta clase de medicamentos

#### Consideraciones de implementación

**PUNTO DE BUENA PRACTICA:** La decisión de cambio o discontinuación de la terapia con un primer bDMARD debe ir de la mano de un análisis objetivo de la actividad de la enfermedad con el uso de herramientas de clinimetría

#### Prioridades de investigación futura

Se necesita conducir experimentos clínicos aleatorizados que comparen en paralelo el efecto de medicamentos de las clases Inhibidores TNF $\alpha$ ; anti IL-17A; anti IL12-23; inhibidores JAK ; cuando se usan como terapia de segunda línea para contar con evidencia directa que permita generar recomendaciones con mayor certeza en la evidencia. Se debe priorizar la conducción de estudios que evalúen el impacto en la calidad de vida y e las preferencias de los pacientes que han fallado a una primera línea de tratamiento.

## Pregunta 4: Tabla de resumen de hallazgos GRADE

Ritchlin C, Rahman P, Kavanaugh A, McInnes IB, Puig L, Li S, et al. Efficacy and safety of the anti IL-12/23 p40 monoclonal antibody, ustekinumab, in patients with active psoriatic arthritis despite conventional non-biological and biological anti tumour necrosis factor therapy: 6-month and 1-year results of the phase 3, multicentre, double-blind, placebo-controlled, randomised PSUMMIT 2 trial. Ann Rheum Dis. 2014;73(6):990-9.

| Quality assessment                                                                                         |                   |              |                                 |                         |                        |                      | No of patients |                | Effect                     |                                             | Quality   | Importance |
|------------------------------------------------------------------------------------------------------------|-------------------|--------------|---------------------------------|-------------------------|------------------------|----------------------|----------------|----------------|----------------------------|---------------------------------------------|-----------|------------|
| No of studies                                                                                              | Design            | Risk of bias | Inconsistency (I <sup>2</sup> ) | Indirectness            | Imprecision            | Other considerations | Any PT         | Control: No PT | Relative (95% CI)          | Absolute                                    |           |            |
| Control de la enfermedad: ACR 20 (tiempo promedio de seguimiento 24 semanas)                               |                   |              |                                 |                         |                        |                      |                |                |                            |                                             |           |            |
| 1                                                                                                          | randomized trials | No serious   | no serious inconsistency        | no serious indirectness | no serious imprecision | none                 | 118            | 62             | RR 2,45 (IC 95% 1,31;4,58) | -                                           | ⊕⊕⊕⊕ ALTA | CRITICAL   |
| Funcionalidad: HAQ-DI (tiempo promedio de seguimiento 24 semanas; valores más bajos indican mejor control) |                   |              |                                 |                         |                        |                      |                |                |                            |                                             |           |            |
| 1                                                                                                          | randomized trials | No serious   | no serious inconsistency        | no serious indirectness | no serious imprecision | none                 | 118            | 62             | -                          | MD -0.13 lower (-0.38 lower to 0.00 higher) | ⊕⊕⊕⊕ ALTA | CRITICAL   |
| Eventos adversos                                                                                           |                   |              |                                 |                         |                        |                      |                |                |                            |                                             |           |            |
| 1                                                                                                          | randomized trials | No serious   | no serious inconsistency        | no serious indirectness | no serious imprecision | none                 | 207            | 104            | RR 1,13 (IC95% 0,9;1,41)   | -                                           | ⊕⊕⊕⊕ ALTA | CRITICAL   |

## Referencias:

1. Kroon F, Landewe R, Dougados M, van der Heijde D. Continuous NSAID use reverts the effects of inflammation on radiographic progression in patients with ankylosing spondylitis. *Ann Rheum Dis*. 2012;71(10):1623-9.
2. Molto A, Sieper J. Peripheral spondyloarthritis: Concept, diagnosis and treatment. *Best practice & research Clinical rheumatology*. 2018;32(3):357-68.
3. van der Heijde D, Ramiro S, Landewe R, Baraliakos X, Van den Bosch F, Sepriano A, et al. 2016 update of the ASAS-EULAR management recommendations for axial spondyloarthritis. *Ann Rheum Dis*. 2017;76(6):978-91.
4. Gossec L, Smolen JS, Ramiro S, de Wit M, Cutolo M, Dougados M, et al. European League Against Rheumatism (EULAR) recommendations for the management of psoriatic arthritis with pharmacological therapies: 2015 update. *Ann Rheum Dis*. 2016;75(3):499-510.
5. Nash P, Clegg DO. Psoriatic arthritis therapy: NSAIDs and traditional DMARDs. 2005;64(suppl 2):ii74-ii7.
6. López-Medina C, Moltó A, Dougados M. FRI0189 Peripheral manifestations in spondyloarthritis: impact on patient-reported outcomes (PROS) and treatment. data from asas-comospa. 2018;77(Suppl 2):635-.
7. Dougados M, Boumier P, Amor B. Sulphasalazine in ankylosing spondylitis: a double blind controlled study in 60 patients. 1986;293(6552):911-4.
8. Conti F, Ceccarelli F, Marocchi E, Magrini L, Spinelli FR, Spadaro A, et al. Switching tumour necrosis factor alpha antagonists in patients with ankylosing spondylitis and psoriatic arthritis: an observational study over a 5-year period. *Ann Rheum Dis*. 2007;66(10):1393-7.
9. Paccou J, Solau-Gervais E, Houvenagel E, Salleron J, Luraschi H, Philippe P, et al. Efficacy in current practice of switching between anti-tumour necrosis factor- agents in spondyloarthropathies. *Rheumatology (Oxford, England)*. 2010;50:714-20.
10. Ritchlin C, Rahman P, Kavanaugh A, McInnes IB, Puig L, Li S, et al. Efficacy and safety of the anti-IL-12/23 p40 monoclonal antibody, ustekinumab, in patients with active psoriatic arthritis despite conventional non-biological and biological anti-tumour necrosis factor therapy: 6-month and 1-year results of the phase 3, multicentre, double-blind, placebo-controlled, randomised PSUMMIT 2 trial. *Ann Rheum Dis*. 2014;73(6):990-9.
11. Corbett M, Chehadah F, Biswas M, Moe-Byrne T, Palmer S, Soares M, et al. Certolizumab pegol and secukinumab for treating active psoriatic arthritis following inadequate response to disease-modifying antirheumatic drugs: a systematic review and economic evaluation. *Health technology assessment (Winchester, England)*. 2017;21(56):1-326.

## GPC para pacientes con Espondiloartritis Periférica ASOREUMA

Pregunta 5. ¿En el tratamiento de pacientes adultos con Espondiloartritis y uveítis asociada como manifestación extra articular, se debe usar DMARDs convencionales, dada su efectividad en el control de la enfermedad y perfil de seguridad?

|                     |                                                                                                  |         |
|---------------------|--------------------------------------------------------------------------------------------------|---------|
| <b>Población</b>    | Pacientes con espondiloartritis periférica y uveítis asociada como manifestación extra articular |         |
| <b>Intervención</b> | DMARD convencionales                                                                             |         |
| <b>Comparación</b>  | DMARD convencionales                                                                             |         |
| <b>Desenlaces</b>   | Control enfermedad- Remisión/baja actividad de síntomas                                          | Crítico |
|                     | Control enfermedad- Mejoría en escalas de funcionalidad                                          | Crítico |
|                     | Control enfermedad- progresión radiográfica                                                      | Crítico |
|                     | calidad de vida                                                                                  | Crítico |
|                     | Perfil de seguridad: Eventos adversos                                                            | Crítico |

### Antecedentes

La uveítis es la manifestación extraarticular más común de la espondiloartritis (EspA) y la uveitis aguda anterior es la forma más común de uveítis encontrada en la EspA y representa el 90% de los casos de uveitis(1). Se ha estimado que la prevalencia general de HLA-B27 asociada a uveitis anterior aguda en el grupo de EspA es de aproximadamente un 30% y a su vez la prevalencia general de EspA en pacientes con HLA-B27 asociada a uveitis anterior aguda está por encima del 50% (2).

En Sur América una serie de pacientes con EspA documento una prevalencia de uveitis y EspA del 20% (3)

La prevalencia de uveitis aumenta con la duración de la EspA y puede llegar a ser tan alta como el 43% en enfermedades de 30 años o más de duración(4).

La uveitis hace referencia a la inflamación del iris, cuerpo ciliar y coroides y se manifiesta por dolor, sensibilidad a la luz, visión borrosa, y enrojecimiento del ojo. Las complicaciones graves incluyen la elevación en la presión intraocular, cataratas, glaucoma e incluso atrofia del globo ocular que puede llevar a la pérdida permanente de la visión (5). El objetivo de tratamiento de la uveitis en la EspA es la resolución de los síntomas por medio del control de la inflamación, en la mayoría de los casos la uveitis puede resolver con el tratamiento con corticoides locales y midriáticos, si los

## GPC para pacientes con Espondiloartritis Periférica ASOREUMA

síntomas no resuelven, las inyecciones con corticoides intraoculares a altas dosis serán requeridas (6).

En la actualidad las opciones de tratamiento pueden ser divididas en terapias tópicas, inyección de corticoides perioculares, corticoides intravítreos, AINES, corticoides sistémicos, terapia biológica y terapia inmunosupresora, la actual pregunta revisara la efectividad y perfil de seguridad de esta última terapia, la cual ha sido ampliamente usada en pacientes con uveítis por décadas, el metrotexato y la sulfasalazina han mostrado ser efectivos en controlar la inflamación ocular, prevenir las agudizaciones de la uveítis aguda y la perdida potencial de la visión (7).

### Evidencia

La búsqueda de la literatura realizada identificó una revisión sistemática publicada en 2017 (8) que evalúa la efectividad de los DMARD convencionales en el manejo de la uveítis asociada a espondiloartritis. Esta revisión incluyó ensayos clínicos aleatorios y estudios observacionales que aportan información para resolver esta pregunta como se describe más adelante.

Adicionalmente se identificó un ensayo clínico aleatorio (ECA) publicado en 2019 (12) cuyo objetivo fue comparar el efecto del metrotexato y micofenolato mofetilo para lograr el control de la uveítis con ahorro de esteroides. Los pacientes incluidos tuvieron en promedio 38 años (62.5% fueron mujeres) y fueron aleatorizados a recibir 25mg de MTX (n=107) vs micofenolato mofetil 3g/día (n=109). Un total de 194 (89.8%) completaron el seguimiento a 6 meses.

### *Control de la enfermedad*

#### **Metotrexato:**

La RS incluyó un estudio prospectivo (7) en 9 pacientes que mostro que el metrotexato disminuía el número de agudizaciones de la uveítis anterior con un promedio de recurrencias en el año previo de tratamiento de 3.4 (SD 0.52) las cuales se redujeron a 0.89 (SD 1.17) en el año de tratamiento (p=0.011) adicionalmente se documentó un incremento en el intervalo de tiempo entre agudizaciones, las dosis varían entre 7.5mg y 25mg semanales y los efectos se han descrito a corto y largo plazo. En el subgrupo de pacientes que recibía de forma concomitante esteroides sistémicos las dosis de estos progresivamente se logran disminuir hasta su retiro.

El ECA (12) considero tratamiento exitoso el control de la inflamación en ambos ojos con uso de prednisona no mayor a 7.5mg/día, este se alcanzó en 64 pacientes (66.7%) en el grupo de pacientes con MTX y 56 (57.1%) en el grupo de micofenolato DM 9.5% (IC 95% -5.3 a 21.8); OR 1.5 IC 95% 0.81-2.81 (p=0.2). Los autores concluyeron que, en pacientes adultos con diagnóstico de uveítis no infecciosa, el uso de micofenolato

## GPC para pacientes con Espondiloartritis Periférica ASOREUMA

comparado con MTX como tratamiento de primera línea para ahorrar esteroides no mostró mejor control de la inflamación.

### **Sulfasalazina:**

La sulfasalazina en dosis de 500mg a 2g día por 3 años, fue evaluada en un ECA incluido en la revisión (12). Este estudio evaluado como de baja calidad metodologica, incluyó 22 pacientes y mostró una reducción significativa en el número de agudizaciones de la uveítis anterior y mejoría de la agudeza visual en pacientes con diagnóstico de espondilitis anquilosante asociada a uveítis anterior. Otros estudios observacionales incluidos en la misma RS (12) también documentaron la disminución de las agudizaciones de la uveítis aguda con un adecuado perfil de seguridad (9); el estudio de Muñoz-Fernández (10) mostró que frente a reducción estadísticamente significativa en el número de agudizaciones de 3.4 (SD 0.5) a 0.9 (SD 1.1) en el años de tratamiento con sulfasalazina ( $p=0.007$ ).

### **Azatioprina**

Un estudio prospectivo publicado en 2009 (11) evaluó el efecto de la azatioprina en pacientes con uveítis anterior que habían sido refractarios a otros inmunomoduladores, se documentó una mejoría en la inflamación ocular y disminución en las dosis requeridas de corticoides sistémicos. A los 6 meses y al año un 24 y 35% de los pacientes respectivamente, no mostraron actividad ocular.

### **Ciclosporina A**

En un estudio observacional, calificado en la RS como de moderada calidad metodologica, incluyo 27 pacientes con uveítis anterior (aproximadamente 75% con enfermedad sistémica asociada a uveítis anterior, 33% de los sujetos a los 6 meses y 51% al año alcanzaron un control completo y sostenido de la inflamación durante al menos 2 visitas durante al menos 28 días.

### *Eventos adversos*

Los estudios con MTX reportaron no haber eventos adversos serios mas de los ya conocidos para el MTX. La elevación de las enzimas hepáticas fue el evento adverso no serio más común y ocurrió en 14 pacientes (13%) en el grupo de MTX y 8 (7.4%) en el grupo de micofenolato. El evento adverso más frecuentemente reportado con la ciclosporina fue la toxicidad renal. En los estudios con sulfasalacina no se documentaron eventos adversos relevantes.

### **Valores y preferencia de pacientes**

En 2017, Ayano y cols.(13) publicaron una síntesis cualitativa a cerca de las experiencias y actitudes de los pacientes hacia los DMARD en pacientes con artritis reumatoide y espondiloartritis. Se incluyeron 56 estudios, de los cuales 191 pacientes

## GPC para pacientes con Espondiloartritis Periférica ASOREUMA

tenían diagnóstico de espondiloartritis. Se encontró que los pacientes creen que los DMARD pueden incrementar el riesgo de cáncer y daño de órgano por lo que explicar los beneficios de esta terapia incrementara la aceptación y adherencia y reducirá los miedos de toxicidad a largo plazo.

Los pacientes perciben los DMARD como una medicación fuerte, por lo tanto tienden a ser poco receptivos ante su formulación, sin embargo, la confianza en el cuidado médico, experiencias positivas de otros pacientes con DMARDs y las expectativas a cerca del rol de la medicación en poder mantener la participación en la vida diaria, fueron algunas de las variables que se identificaron que pueden motivar su uso (7).

### Consumo de recursos y Costos

Se identificó una RS revisión sistemática de la evidencia existente de costo-efectividad para los tratamientos administrados principalmente a pacientes adultos con uveítis no infecciosa (14). Esta revisión mostró que ningún estudio existente ha evaluado la rentabilidad de DEX o ADA dentro de esta población de pacientes. Sólo se identificó un modelo económico publicado de uveítis no infecciosa, pero que tiene varias limitaciones, incluida la notificación deficiente de algunos de los métodos, la validación y el análisis de incertidumbre, no tiene en cuenta los EA y usa un horizonte temporal de 3 años, lo que puede no capturar completamente todos los impactos de los tratamientos.

No se identificaron estudios posteriores a esta RS que hayan evaluado los costos ni el consumo de recursos de la intervención.

## Pregunta 5: Marco de trabajo –De la evidencia a las decisiones

| <b>PREGUNTA</b>               |                                                                                                                                               |
|-------------------------------|-----------------------------------------------------------------------------------------------------------------------------------------------|
| <b>POBLACION</b>              | <i>Pacientes con espondiloartritis y uveítis asociada como manifestación extra articular</i>                                                  |
| <b>INTERVENCIÓN</b>           | <i>DMARD convencionales</i>                                                                                                                   |
| <b>COMPARACIÓN</b>            | <i>Placebo</i>                                                                                                                                |
| <b>DESENLACES PRINCIPALES</b> | <i>Eficaz (control enfermedad, remisión/baja actividad de síntomas<br/>Mejoría de escalas de funcionalidad)<br/>Seguro (eventos adversos)</i> |
| <b>ÁMBITO</b>                 | <i>Ambulatorio</i>                                                                                                                            |
| <b>PERSPECTIVA</b>            | <i>Del grupo desarrollador de la Guía</i>                                                                                                     |
| <b>CONFLICTO DE INTERÉS:</b>  | <i>No se hace manifiesto ningún conflicto de interés</i>                                                                                      |

## Evaluación

| <b>Problema</b><br>¿Es el problema una prioridad? |                                      |                                    |
|---------------------------------------------------|--------------------------------------|------------------------------------|
| <b>JUICIO</b>                                     | <b>EVIDENCIA DE LA INVESTIGACION</b> | <b>CONSIDERACIONES ADICIONALES</b> |

|                                                                                                                                                                             |                                                                                                                                                                                                                                                                                                                                                                                                                                                                                                            |  |
|-----------------------------------------------------------------------------------------------------------------------------------------------------------------------------|------------------------------------------------------------------------------------------------------------------------------------------------------------------------------------------------------------------------------------------------------------------------------------------------------------------------------------------------------------------------------------------------------------------------------------------------------------------------------------------------------------|--|
| <ul style="list-style-type: none"> <li>○ No</li> <li>○ Probablemente No</li> <li>○ Probablemente Si</li> <li>○ Si</li> <li>○ Es variable</li> <li>○ No se conoce</li> </ul> | <p>La uveitis es la manifestación extraarticular más común de la espondiloartritis (EspA) y la uveitis aguda anterior es la forma más común de uveitis encontrada en la EspA y representa el 90% de los casos de uveitis(1). Se ha estimado que la prevalencia general de HLA-B27 asociada a uveitis anterior aguda en el grupo de EspA es de aproximadamente un 30% y a su vez la prevalencia general de EspA en pacientes con HLA-B27 asociada a uveitis anterior aguda está por encima del 50% (2).</p> |  |
|-----------------------------------------------------------------------------------------------------------------------------------------------------------------------------|------------------------------------------------------------------------------------------------------------------------------------------------------------------------------------------------------------------------------------------------------------------------------------------------------------------------------------------------------------------------------------------------------------------------------------------------------------------------------------------------------------|--|

### Efectos deseables (beneficios de la opción a recomendar)

¿Qué tan sustanciales son los efectos deseables de la opción?

| JUICIO                                                                                                                                                            | EVIDENCIA DE LA INVESTIGACION                                                                                                                                                                                                                                                                                                          | CONSIDERACIONES ADICIONALES |
|-------------------------------------------------------------------------------------------------------------------------------------------------------------------|----------------------------------------------------------------------------------------------------------------------------------------------------------------------------------------------------------------------------------------------------------------------------------------------------------------------------------------|-----------------------------|
| <ul style="list-style-type: none"> <li>○ Triviales</li> <li>○ Pequeños</li> <li>○ Moderados</li> <li>○ Grandes</li> <li>○ Varían</li> <li>○ No se sabe</li> </ul> | <p>La revisión sistémica identificada, reporta estudios con pequeño tamaño de muestra que evalúan la efectividad y seguridad de los diferentes DMARD sin poder generarse una medida de efecto conjunto, la calidad de los estudios es en su mayoría baja, pero como se describió muestran reducción en el número de agudizaciones.</p> |                             |

### Efectos Indeseables

¿Qué tan sustanciales son los efectos indeseables que se pueden anticipar?

| JUICIO | EVIDENCIA DE LA INVESTIGACION | CONSIDERACIONES ADICIONALES |
|--------|-------------------------------|-----------------------------|
|        |                               |                             |

|                                                                                                                                                                   |                                                                                                                                                                                                                                                                                              |                                                                                   |
|-------------------------------------------------------------------------------------------------------------------------------------------------------------------|----------------------------------------------------------------------------------------------------------------------------------------------------------------------------------------------------------------------------------------------------------------------------------------------|-----------------------------------------------------------------------------------|
| <ul style="list-style-type: none"> <li>○ Triviales</li> <li>○ Pequeños</li> <li>○ Moderados</li> <li>○ Grandes</li> <li>○ Varían</li> <li>○ No se sabe</li> </ul> | Los estudios no documentaron eventos adversos serios, los eventos adversos fueron los comúnmente reportados con el uso de estos medicamentos.                                                                                                                                                |                                                                                   |
| <b>Certeza en la Evidencia</b><br>¿Cuál es la certeza en la evidencia global sobre los efectos de la opción a recomendar?                                         |                                                                                                                                                                                                                                                                                              |                                                                                   |
| <b>JUICIO</b>                                                                                                                                                     | <b>EVIDENCIA DE LA INVESTIGACION</b>                                                                                                                                                                                                                                                         | <b>CONSIDERACIONES ADICIONALES</b>                                                |
| <ul style="list-style-type: none"> <li>○ Muy baja</li> <li>○ Baja</li> <li>○ Moderada</li> <li>○ Alta</li> <li>○ No se identificaron estudios</li> </ul>          | La certeza en la evidencia es muy baja, proviene de estudios observacionales en su mayoría cohortes de seguimiento con tamaño muestral pequeño y evidencia indirecta.                                                                                                                        |                                                                                   |
| <b>Valores de los pacientes</b><br>¿Hay variación o poca certeza sobre cómo valoran las personas/los pacientes los desenlaces principales?                        |                                                                                                                                                                                                                                                                                              |                                                                                   |
| <b>JUICIO</b>                                                                                                                                                     | <b>EVIDENCIA DE LA INVESTIGACION</b>                                                                                                                                                                                                                                                         | <b>CONSIDERACIONES ADICIONALES</b>                                                |
| <ul style="list-style-type: none"> <li>○ Variabilidad o incertidumbre importante</li> <li>○ Posiblemente hay variabilidad o incertidumbre</li> </ul>              | El estudio identificado muestra que los pacientes perciben los DMARD como una medicación fuerte, pero la confianza en el cuidado médico, experiencias positivas con DMARD de otros pacientes y expectativas a cerca del rol de la medicación ayudando a mantener la participación en la vida | No se conoce el valor que los pacientes dan en Colombia al tratamiento con DMARDs |

|                                                                                                                                                                                                                                                                                                                         |                                                                                                                                                                                                                           |                                    |
|-------------------------------------------------------------------------------------------------------------------------------------------------------------------------------------------------------------------------------------------------------------------------------------------------------------------------|---------------------------------------------------------------------------------------------------------------------------------------------------------------------------------------------------------------------------|------------------------------------|
| <p>importante</p> <ul style="list-style-type: none"> <li>○ Posiblemente No hay variabilidad o incertidumbre importante</li> <li>○ No hay variabilidad o incertidumbre importante</li> </ul>                                                                                                                             | <p>diaria puede motivar su uso.</p>                                                                                                                                                                                       |                                    |
| <b>Balance de los efectos</b><br>¿El balance entre los efectos deseables e indeseables favorece la opción o el comparador?                                                                                                                                                                                              |                                                                                                                                                                                                                           |                                    |
| <b>JUICIO</b>                                                                                                                                                                                                                                                                                                           | <b>EVIDENCIA DE LA INVESTIGACION</b>                                                                                                                                                                                      | <b>CONSIDERACIONES ADICIONALES</b> |
| <ul style="list-style-type: none"> <li>○ Favorece al comparador</li> <li>○ Probablemente favorece al comparador</li> <li>○ No favorece al comparador ni a la opción en evaluación</li> <li>○ Probablemente favorece a la opción</li> <li>○ Favorece a la intervención</li> <li>○ Varía</li> <li>○ No se sabe</li> </ul> | <p>El efecto potencialmente benefico del uso de DMARDs en el tratamiento de la uveitis en pacientes con espondiloartritis es mayor que el riesgo de eventos adversos serios, según reportan los estudios encontrados.</p> |                                    |
| <b>Recursos requeridos y costos</b><br>Qué tan grande es el requerimiento de recursos (costos)?                                                                                                                                                                                                                         |                                                                                                                                                                                                                           |                                    |
| <b>JUICIO</b>                                                                                                                                                                                                                                                                                                           | <b>EVIDENCIA DE LA INVESTIGACION</b>                                                                                                                                                                                      | <b>CONSIDERACIONES ADICIONALES</b> |

|                                                                                                                                                                                                                                              |                                                                                                                                                                                                                                                                                                                                                                                                                                                                                                                                                                                                                                                                                                               |                                                                                                             |
|----------------------------------------------------------------------------------------------------------------------------------------------------------------------------------------------------------------------------------------------|---------------------------------------------------------------------------------------------------------------------------------------------------------------------------------------------------------------------------------------------------------------------------------------------------------------------------------------------------------------------------------------------------------------------------------------------------------------------------------------------------------------------------------------------------------------------------------------------------------------------------------------------------------------------------------------------------------------|-------------------------------------------------------------------------------------------------------------|
| <ul style="list-style-type: none"> <li>○ Grandes costos</li> <li>○ Costos moderados</li> <li>○ no significantes costos ni ahorros</li> <li>○ Moderados ahorros</li> <li>○ Grandes ahorros</li> <li>○ Varían</li> <li>○ No se sabe</li> </ul> | Se identificó una RS revisión sistemática de la evidencia existente de costo-efectividad para los tratamientos administrados principalmente a pacientes adultos con uveítis no infecciosa (13). Esta revisión mostró que ningún estudio existente ha evaluado la rentabilidad de DEX o ADA dentro de esta población de pacientes. Sólo se identificó un modelo económico publicado de uveítis no infecciosa, pero que tiene varias limitaciones, incluida la notificación deficiente de algunos de los métodos, la validación y el análisis de incertidumbre, no tiene en cuenta los EA y usa un horizonte temporal de 3 años, lo que puede no capturar completamente todos los impactos de los tratamientos. | No existe información del consumo de recursos relacionado con estos tratamientos en el contexto colombiano. |
|----------------------------------------------------------------------------------------------------------------------------------------------------------------------------------------------------------------------------------------------|---------------------------------------------------------------------------------------------------------------------------------------------------------------------------------------------------------------------------------------------------------------------------------------------------------------------------------------------------------------------------------------------------------------------------------------------------------------------------------------------------------------------------------------------------------------------------------------------------------------------------------------------------------------------------------------------------------------|-------------------------------------------------------------------------------------------------------------|

### Equidad

¿La implementación de la opción, tendrá impacto en la equidad?

| JUICIO                                                                                                                                                                                                                                                   | EVIDENCIA DE LA INVESTIGACION | CONSIDERACIONES ADICIONALES |
|----------------------------------------------------------------------------------------------------------------------------------------------------------------------------------------------------------------------------------------------------------|-------------------------------|-----------------------------|
| <ul style="list-style-type: none"> <li>○ Reduce</li> <li>○ Probablemente se reduce la equidad</li> <li>○ Probablemente no impacta la equidad</li> <li>○ Probablemente incrementa</li> <li>○ Incrementa</li> <li>○ Varía</li> <li>○ No se sabe</li> </ul> |                               |                             |

|                                                                                                                                                                                                                        |                                                                                                                                         |                                                                                                                                    |
|------------------------------------------------------------------------------------------------------------------------------------------------------------------------------------------------------------------------|-----------------------------------------------------------------------------------------------------------------------------------------|------------------------------------------------------------------------------------------------------------------------------------|
|                                                                                                                                                                                                                        |                                                                                                                                         |                                                                                                                                    |
| <b>Aceptabilidad</b><br>¿Es la opción aceptada por los diferentes actores involucrados en su implementación?                                                                                                           |                                                                                                                                         |                                                                                                                                    |
| <b>JUICIO</b>                                                                                                                                                                                                          | <b>EVIDENCIA DE LA INVESTIGACION</b>                                                                                                    | <b>CONSIDERACIONES ADICIONALES</b>                                                                                                 |
| <input type="radio"/> No<br><input type="radio"/> Probablemente no<br><input type="radio"/> Probablemente si<br><input type="radio"/> Si<br><input type="radio"/> Varia<br><input checked="" type="radio"/> No se sabe |                                                                                                                                         |                                                                                                                                    |
| <b>Factibilidad</b><br>¿Es la opción factible de IMPLEMENTAR?                                                                                                                                                          |                                                                                                                                         |                                                                                                                                    |
| <b>JUICIO</b>                                                                                                                                                                                                          | <b>EVIDENCIA DE LA INVESTIGACION</b>                                                                                                    | <b>CONSIDERACIONES ADICIONALES</b>                                                                                                 |
| <input type="radio"/> No<br><input type="radio"/> Probablemente no<br><input type="radio"/> Probablemente si<br><input type="radio"/> Si<br><input type="radio"/> Varia                                                | No se encontraron estudios de factibilidad de la implementación del uso de DMARDs en el tratamiento de pacientes con espondiloartritis. | La opción se considera factible de implementar en Colombia dado que los DMARDs son medicamentos que cuentan con aprobación Invima. |

|              |  |  |
|--------------|--|--|
| ○ No se sabe |  |  |
|--------------|--|--|

## Resumen de Juicios

|                         | JUICIOS                                 |                                                      |                                                          |                                            |                          |       |                     |
|-------------------------|-----------------------------------------|------------------------------------------------------|----------------------------------------------------------|--------------------------------------------|--------------------------|-------|---------------------|
| PROBLEMA                | No                                      | Probablemente no                                     | Probablemente si                                         | Si                                         |                          | Varia | No se sabe          |
| EFFECTOS DESEABLES      | Triviales                               | Pequeños                                             | Moderados                                                | Grandes                                    |                          | Varia | No se sabe          |
| EFFECTOS INDESEABLES    | Grandes                                 | Moderados                                            | Pequeños                                                 | Triviales                                  |                          | Varia | No se sabe          |
| CERTEZA EN LA EVIDENCIA | Muy Baja                                | Baja                                                 | Moderada                                                 | Alta                                       |                          |       | No incluyó estudios |
| VALORES DE PACIENTES    | Importante incertidumbre o variabilidad | Posiblemente Importante incertidumbre o variabilidad | Probablemente No Importante incertidumbre o variabilidad | No Importante incertidumbre o variabilidad |                          |       |                     |
| BALANCE DE LOS EFECTOS  | Favorece el comparador                  | Probablemente Favorece el comparador                 | No favorece Ni la intervención ni el comparador          | Probablemente favorece la intervención     | Favorece la intervención | Varia | No se sabe          |
| RECURSOS REQUERIDOS     | Grandes costos                          | Moderados costos                                     | Costos y ahorros insignificantes                         | Moderados ahorros                          | Grandes ahorros          | Varia | No se sabe          |
| EQUIDAD                 | Reducida                                | Probablemente                                        | Probablemente                                            | Probablemente                              | Incrementada             | Varia | No se sabe          |

| JUICIOS       |    |                  |                  |              |  |       |            |
|---------------|----|------------------|------------------|--------------|--|-------|------------|
|               |    | reducida         | no impactada     | incrementada |  |       |            |
| ACEPTABILIDAD | No | Probablemente No | Probablemente Si | Si           |  | Varia | No se sabe |
| FACTIBILIDAD  | No | Probablemente No | Probablemente Si | Si           |  | Varia | No se sabe |

### Tipo de Recomendación

|                                             |                                                  |                                                                           |                                                       |                                           |
|---------------------------------------------|--------------------------------------------------|---------------------------------------------------------------------------|-------------------------------------------------------|-------------------------------------------|
| Recomendación fuerte en contra de la opción | Recomendación condicional en contra de la opción | Recomendación condicional a favor de cualquiera la opción o su comparador | <b>Recomendación condicional a favor de la opción</b> | Recomendación fuerte a favor de la opción |
| ○                                           | ○                                                | ○                                                                         | X                                                     | ○                                         |

### Conclusiones

#### Recomendación

1. En pacientes adultos con EspAp y **uveítis anterior** asociada como manifestación extra articular Se recomienda de forma condicional el uso de metotrexato o sulfasalazina con el objetivo de reducir las exacerbaciones. Recomendación condicional a favor de la opción –Baja Calidad de evidencia.
2. En pacientes adultos con EspAp y uveítis anterior que no responde al manejo con inmunomoduladores, se recomienda de forma condicional, el uso de azatioprina con el objetivo de controlar la inflamación ocular

#### Justificación

El panel considera que actualmente existe una falta de evidencia sólida sobre el uso de inmunomoduladores en pacientes con espondiloartritis y uveítis anterior, pero la evidencia disponible muestra potencial efectividad del MTX y de la sulfasalazina en prevenir las agudizaciones de la uveítis anterior y mejorar la agudeza visual. Siendo el MTX un tratamiento seguro en estos pacientes.

### **Prioridades de investigación futura**

Se requieren estudios experimentales con adecuado control de sesgos que evalúen el uso de los DMARDs convencionales en los pacientes con Espondiloartritis y uveítis asociada como manifestación extra articular. Es necesario también evaluar el impacto económico que estas intervenciones pueden tener en el sistema de salud el país.

## Referencias

1. Zeboulon N, Dougados M, Gossec L. Prevalence and characteristics of uveitis in the spondyloarthropathies: a systematic literature review. *Ann Rheum Dis*. julio de 2008;67(7):955-9.
2. Mitulescu T-C, Trandafir M, Dimăncescu M-G, Ciuluvică R-C, Popescu V, Predețeanu D, et al. Advances in the treatment of uveitis in patients with spondyloarthritis - is it the time for biologic therapy? *Romanian J Ophthalmol*. junio de 2018;62(2):114-22.
3. Gallinaro AL, Ventura C, Barros PDS, Gonçalves CR. Spondyloarthritis: analysis of a Brazilian series compared with a large Ibero-American registry (RESPONDIA group). *Rev Bras Reumatol* [Internet]. octubre de 2010 [citado 22 de septiembre de 2020];50(5):581-9. Disponible en: [http://www.scielo.br/scielo.php?script=sci\\_abstract&pid=S0482-50042010000500009&lng=en&nrm=iso&tlng=pt](http://www.scielo.br/scielo.php?script=sci_abstract&pid=S0482-50042010000500009&lng=en&nrm=iso&tlng=pt)
4. Sharma SM, Jackson D. Uveitis and spondyloarthropathies. *Best Pract Res Clin Rheumatol*. 2017;31(6):846-62.
5. Hood CT. The Wills eye manual: office and emergency room diagnosis and treatment of eye disease. *Br J Ophthalmol* [Internet]. 1 de agosto de 2009 [citado 6 de julio de 2020];93(8):1127-8. Disponible en: <https://bjo.bmj.com/content/93/8/1127.2>
6. Gupta N, Agarwal A. Management of Uveitis in Spondyloarthropathy: Current Trends. *Perm J* [Internet]. 15 de diciembre de 2017 [citado 6 de julio de 2020];22. Disponible en: <https://www.ncbi.nlm.nih.gov/pmc/articles/PMC5741284/>
7. Muñoz-Fernández S, García-Aparicio AM, Hidalgo MV, Platero M, Schlincker A, Bascones ML, et al. Methotrexate: an option for preventing the recurrence of acute anterior uveitis. *Eye* [Internet]. mayo de 2009 [citado 23 de septiembre de 2020];23(5):1130-3. Disponible en: <https://www.nature.com/articles/eye2008198>
8. Gómez-Gómez A, Loza E, Rosario MP, Espinosa G, Morales JMGR de, Herreras JM, et al. Efficacy and safety of immunomodulatory drugs in patients with anterior uveitis: A systematic literature review. *Medicine (Baltimore)*. octubre de 2017;96(42):e8045.
9. Dougados M, Berenbaum F, Maetzel A, Amor B. [Prevention of acute anterior uveitis associated with spondylarthropathy induced by salazosulfapyridine]. *Rev Rhum Ed Francaise* 1993. enero de 1993;60(1):81-3.
10. Muñoz-Fernández S, Hidalgo V, Fernández-Melón J, Schlincker A, Bonilla G, Ruiz-Sancho D, et al. Sulfasalazine reduces the number of flares of acute anterior uveitis over a one-year period. *J Rheumatol*. junio de 2003;30(6):1277-9.

11. Pasadhika S, Kempen JH, Newcomb CW, Liesegang TL, Pujari SS, Rosenbaum JT, et al. Azathioprine for ocular inflammatory diseases. *Am J Ophthalmol.* octubre de 2009;148(4):500-509.e2.
12. Rathinam SR, Gonzales JA, Thundikandy R, Kanakath A, Murugan SB, Vedhanayaki R, et al. Effect of Corticosteroid-Sparing Treatment With Mycophenolate Mofetil vs Methotrexate on Inflammation in Patients With Uveitis: A Randomized Clinical Trial. *JAMA.* 10 de 2019;322(10):936-45.
13. Kelly A, Tymms K, Tunnicliffe DJ, Sumpton D, Perera C, Fallon K, et al. Patients' Attitudes and Experiences of Disease-Modifying Antirheumatic Drugs in Rheumatoid Arthritis and Spondyloarthritis: A Qualitative Synthesis. *Arthritis Care Res [Internet].*;70(4):525-32.
14. Squires H, Poku E, Bermejo I, et al. A systematic review and economic evaluation of adalimumab and dexamethasone for treating non-infectious intermediate uveitis, posterior uveitis or panuveitis in adults. Southampton (UK): NIHR Journals Library; 2017 Nov. (Health Technology Assessment, No. 21.68.) Chapter 4, Assessment of cost-effectiveness. Available from: <https://www.ncbi.nlm.nih.gov/books/NBK464959/>

Pregunta 6. ¿En el tratamiento de pacientes adultos con Espondiloartritis y uveítis asociada como manifestación extra articular, se debe usar DMARDs Biológicos (anti TNF $\alpha$ , anti IL-17, anti IL 12-23, inhibidores JAK) dada su efectividad en el de la control enfermedad y su perfil de seguridad?

|                     |                                                                                                  |         |
|---------------------|--------------------------------------------------------------------------------------------------|---------|
| <b>Población</b>    | Pacientes con espondiloartritis periférica y uveítis asociada como manifestación extra articular |         |
| <b>Intervención</b> | DMARD Biológicos (Anti TNF, anti IL-17, anti IL 12-23, inhibidores JAK)                          |         |
| <b>Comparación</b>  | DMARD convencionales (MTX)                                                                       |         |
| <b>Desenlaces</b>   | Control enfermedad- Remisión/baja actividad de síntomas                                          | Crítico |
|                     | Control enfermedad- Mejoría en escalas de funcionalidad                                          | Crítico |
|                     | Control enfermedad- progresión radiográfica                                                      | Crítico |
|                     | calidad de vida                                                                                  | Crítico |
|                     | Perfil de seguridad: Eventos adversos                                                            | Crítico |

## Antecedentes

En las espondiloatropatías, el curso de la enfermedad usualmente se complica por manifestaciones extraarticulares como la psoriasis o la uveítis aguda anterior (UAA), esta última corresponde a una inflamación aguda no infecciosa del tracto uveal anterior y sus estructuras adyacentes(1). El diagnóstico temprano y tratamiento adecuado es crucial para evitar las complicaciones de la inflamación ocular crónica o remitente, como la pérdida visual o ceguera. La uveítis puede ocurrir a cualquier edad, pero afecta más comúnmente a población entre los 20-59 años.

El tratamiento para las crisis de uveítis involucra el control de la inflamación local, comúnmente con corticoides administrados de forma tópica, por inyecciones locales dentro o alrededor de las estructuras oculares o corticoides sistémicos, sin embargo, estos medicamentos no están exentos de complicaciones oculares y sistémicas, lo que limita su uso a largo plazo (2).

Los agentes biológicos actualmente disponibles son proteínas recombinantes o anticuerpos dirigidos a objetivos proteicos específicos como citoquinas o receptores de superficie celular. Estos agentes se dirigen a moléculas individuales en la cascada inflamatoria, lo que resulta en la supresión de efectores inmunes específicos. Existen varias clases de terapias biológicas, incluidos agentes anti TNF los cuales se ha documentado su ingreso al líquido acuoso, agentes anti interleucinas o anti receptores de interleucinas (3). El factor de necrosis tumoral alfa es esencial en la respuesta inmune intraocular y en la autorregulación fisiológica de las células oculares. Se presume que el uso de los DMARD biológicos podría afectar significativamente el pronóstico de la UAA asociada con espondiloartropatías (4).

### Efectividad

La búsqueda de la literatura realizada no identificó revisiones sistemáticas que evaluaran la efectividad de los DMARD biológicos en el manejo de la uveítis asociada a espondiloartropatías. Se identificó una revisión no sistemática publicada por Braun y cols (4) en 2005, que evaluaron la evidencia de 4 estudios placebo controlados con agentes anti TNF (2 con etanercept y 2 con infliximab) y 3 estudios abiertos. Se incluyeron 717 pacientes, la información de seguimiento de uveítis anterior estuvo disponible en 397 pacientes de los cuales 297 recibieron etanercept, 90 infliximab y 190 placebo.

A continuación se relacionan otros estudios identificados en la última década, los cuales son de carácter observacional o serie de casos, se presentan las terapias y desenlaces evaluados, pero no se realiza una descripción detallada de la evidencia dado que sus características metodológicas no permiten realizar inferencias con confiabilidad.

| Referencia           | Diseño del estudio                          | Diagnóstico               | Número de pacientes | Medicamento      | Desenlaces evaluados                                                |
|----------------------|---------------------------------------------|---------------------------|---------------------|------------------|---------------------------------------------------------------------|
| Rudwaleir M 2009 (5) | Observacional prospectivo                   | Espondilitis Anquilosante | 274                 | Adalimumab       | Número de agudizaciones de UAA                                      |
| Faez S 2013 (6)      | Serie de casos retrospectivo                | Espondiloartritis         | 3                   | Golimumab        | Agudeza visual                                                      |
| Dobner BC 2013 (7)   | Observacional, retrospectivo, multicéntrico | Espondiloartritis         | 60                  | Adalimumab (ADA) | Mejoría en los criterios de actividad visual y ahorro de esteroides |
| Van Denderen         | Observacional                               | Espondilitis              | 71                  | Adalimumab       | Número de                                                           |

|                          |                                             |                           |     |                                        |                                                                |
|--------------------------|---------------------------------------------|---------------------------|-----|----------------------------------------|----------------------------------------------------------------|
| 2014 (8)                 | prospectivo                                 | Anquilosante              |     |                                        | agudizaciones antes y después del inicio de tratamiento        |
| Hernandez MV 2016 (9)    | Observacional, retrospectivo, multicéntrico | Espondilitis Anquilosante | 14  | Certolizumab                           | Agudeza visual                                                 |
| Yazgan S 2016(10)        | Observacional, retrospectivo                | Espondilitis Anquilosante | 12  | Golimumab                              | Ahorro de esteroides, agudeza visual y número de agudizaciones |
| Calvo- Rio V 2016 (11)   | Observacional prospectivo                   | Espondiloartritis         | 15  | Golimumab                              | Agudeza visual                                                 |
| Kim M 2016 (12)          | Estudio de cohorte retrospectivo            | Espondilitis Anquilosante | 143 | ADA, infliximab, etanercept            | Número de agudizaciones y reducción en la medicación sistémica |
| Lee S, Park YJ 2019 (13) | Estudio de cohorte retrospectivo            | Espondilitis Anquilosante | 54  | ADA, infliximab, etanercept, golimumab | Número de agudizaciones                                        |

Adicionalmente, en 2014 fueron publicadas unas recomendaciones generadas por un panel de expertos con respecto al uso de anti TNF en pacientes con alteraciones oculares inflamatorias (3). El panel recomendó en pacientes con espondiloartropatías asociadas a uveítis el uso de infliximab o adalimumab como tratamiento ahorrador de esteroides en pacientes con uveítis crónica resultados de espondiloartropatías seronegativas (los estudios que soportan la recomendación se realizaron en pacientes con espondilitis anquilosante (5)(14)).

La guía del colegio americano de reumatología (15) recomendó el uso de dalimumab y infliximab, basado en estudios con limitaciones y evidencia indirecta en los que el adalimumab y infliximab reportan menores tasas de UAA.

### *Control de la enfermedad*

En el estudio de Braun y cols (4), la incidencia de eventos agudos de uveitis anterior en el grupo placebo fue de 15.6 por 100 pacientes- año (IC 95% 7.8 – 27.9), en los

pacientes tratados con anti TNF el promedio de eventos agudos de uveitis anterior fue de 6.8 por 100 pacientes-año ( $p= 0.01$ ), los eventos fueron menos frecuentes en el grupo de infliximab que en el de etanercept (3.4 por 100 pacientes-año vs 7.9 por 100 pacientes-año) pero dicha diferencia no fue estadísticamente significativa.

Rudwaleit y cols en 2008 (5) evaluaron el efecto de del adalimumab en la frecuencia de episodios agudos de uveitis anterior en pacientes con espondilitis anquilosante. Este estudio se realizó a partir de un sub-análisis de un estudio no aleatorio, abierto y multinacional con adalimumab a dosis de 40mg, en el que se incluyeron 211 centros clínicos en 15 ciudades europeas. Se estudiaron 1250 pacientes con un promedio de duración de la enfermedad de 11 años. La tasa de agudización de la UAA previo al tratamiento con adalimumab fue de 15 por 100 pacientes-año en todos los pacientes, posterior al inicio del adalimumab, la tasa de agudización de la UAA se redujo en un 51% (7.4 por 100 pacientes-año) en todos los pacientes. La reducción observada fue estadísticamente significativa ( $p < 0.001$ ) sin embargo las agudizaciones fueron predominantemente leves.

El estudio de seguimiento sueco (8), incluyó 1365 pacientes y encontró que las tasas de uveitis (100 pacientes-año) en pacientes que recibían adalimumab, infliximab y etanercept fueron respectivamente 13.6, 27.5, y 60.3, comparado con las tasas pretratamiento de 36.8, 45.5, y 41.6 respectivamente. En los pacientes que estuvieron dos años previos al inicio del anti TNF libres de uveítis, el etanercept se asoció a un mayor HR que el adalimumab (HR 3.86, 95% CI 1.85 - 8.06) y el infliximab (HR 1.99, 95% CI 1.23 - 3.22). No se encontraron diferencias estadísticamente significativas entre el adalimumab y el infliximab(16).

Kim y cols (18), estudiaron los registros médicos de 143 pacientes con espondiloartritis que visitaron el Hospital St. Mary de Seúl y estaban tomando un agente anti TNF $\alpha$  durante al menos 1 año. Los sujetos se dividieron en 3 grupos según el tratamiento anti TNF $\alpha$ : Grupo 1 (infliximab, 66), Grupo 2 (adalimumab, 45) y Grupo 3 (etanercept. Después del tratamiento con anti TNF $\alpha$ , 71 de 94 pacientes (32 [76,2%] en el grupo 1, 26 [78,8%] en el grupo 2 y 13 [68,4%] en el grupo 3) permanecieron sin recaída de uveítis. Se logró una reducción en el número de medicamentos sistémicos en 129 pacientes (90,2%).

### *Eventos adversos*

En el estudio de Rudwaleit (5) a la semana 12 de tratamiento los patrones de eventos adversos con adalimumab fueron similares para pacientes con y sin tratamiento previo anti TNF y fueron consistentes con el perfil de seguridad conocido de adalimumab.

En el estudio de Kim y cols (18) se observaron 28 casos de efectos secundarios leves y 4 casos fueron tuberculosis, lo que provocó la interrupción del tratamiento anti TNF  $\alpha$ .

En el estudio de Van Denderen (8) 26 pacientes (36%) suspendieron la terapia con adalimumab, en su mayoría por falta de efectividad y en 3 pacientes (11%) por eventos adversos. Se presentaron 268 eventos adversos en su mayoría leves, los cuales fueron observados en 67 pacientes, las infecciones fueron el evento observado con mayor frecuencia (69 veces) ningún paciente falleció en el grupo de adalimumab.

Lee S (13) no reportó como desenlace de interés el perfil de seguridad.

### Valores y preferencia de pacientes

Se identificó el estudio de Bolge y cols en 2017 (17) realizado con el objetivo de describir la experiencia del tratamiento con biológicos endovenosos en pacientes con espondilitis anquilosante, enfermedad de Crohn, artritis psoriásica o colitis ulcerativa. Se realizaron entrevistas semiestructuradas de forma telefónica en 405 pacientes con enfermedades autoinmunes quienes recibieron manejo con biológicos endovenosos para tratar su enfermedad. En una escala de 7 puntos (1=no satisfecho; 7=muy satisfecho), el promedio de satisfacción con la medicación endovenosa (EV) fue de 6.1, el 77% de los pacientes calificó la satisfacción como 6 o 7. El beneficio más frecuentemente percibido de la terapia EV estuvo relacionada con la supervisión que brinda el personal de salud. La mayoría de los pacientes (82% n=332) prefirió la terapia EV sobre la subcutánea, dentro de las razones de la preferencia está el no tener que auto inyectarse, menos frecuencia de dosis y la preferencia de aplicación por parte del personal de salud.

### Consumo de recursos y costos

Un estudio evaluó la carga económica de las manifestaciones extra-articulares de la espondilitis anquilosante en pacientes tratados con anti TNF (18). Se incluyeron estudios realizados entre enero del 2000 y agosto del 2011, en los que se reportara la tasa de uveítis y enfermedad inflamatoria intestinal en pacientes con espondiloartritis tratados con infliximab, etanercept o adalimumab. No se identificaron estudios que evaluaran la utilización de recursos o costos de las manifestaciones extraarticulares en pacientes con espondiloartritis. Los clínicos estimaron unos costos directos de la uveítis en Euros de 1.410 (Alemania) y de 2812 Euros (Francia). Se considera que futuras evaluaciones económicas de anti TNF deben incorporar las manifestaciones extraarticulares y subsecuentes costos de tratamiento.

## Pregunta 6: Marco de trabajo –De la evidencia a las decisiones

| <b>PREGUNTA</b>               |                                                                                                                                               |
|-------------------------------|-----------------------------------------------------------------------------------------------------------------------------------------------|
| <b>POBLACION</b>              | <i>Pacientes con espondiloartritis y uveítis asociada como manifestación extraarticular</i>                                                   |
| <b>INTERVENCIÓN</b>           | <i>DMARD Biológicos (Anti TNF, anti IL-17, Anti IL-23, inhibidores JAK)</i>                                                                   |
| <b>COMPARACIÓN</b>            | <i>Placebo</i>                                                                                                                                |
| <b>DESENLACES PRINCIPALES</b> | <i>Eficaz (control enfermedad, remisión/baja actividad de síntomas<br/>Mejoría de escalas de funcionalidad)<br/>Seguro (eventos adversos)</i> |
| <b>ÁMBITO</b>                 | <i>Ambulatorio</i>                                                                                                                            |
| <b>PERSPECTIVA</b>            | <i>Del grupo desarrollador de la Guía</i>                                                                                                     |
| <b>CONFLICTO DE INTERÉS:</b>  | <i>No se hace manifiesto ningún conflicto de interés</i>                                                                                      |

## Evaluación

| Problema                                                                                                                                                                    |                                                                                                                                                                                                                                                                                                                                                                                                                                                                                                                                                                                                                                                                                                          |                             |
|-----------------------------------------------------------------------------------------------------------------------------------------------------------------------------|----------------------------------------------------------------------------------------------------------------------------------------------------------------------------------------------------------------------------------------------------------------------------------------------------------------------------------------------------------------------------------------------------------------------------------------------------------------------------------------------------------------------------------------------------------------------------------------------------------------------------------------------------------------------------------------------------------|-----------------------------|
| Es el problema una prioridad?                                                                                                                                               |                                                                                                                                                                                                                                                                                                                                                                                                                                                                                                                                                                                                                                                                                                          |                             |
| JUICIO                                                                                                                                                                      | EVIDENCIA DE LA INVESTIGACION                                                                                                                                                                                                                                                                                                                                                                                                                                                                                                                                                                                                                                                                            | CONSIDERACIONES ADICIONALES |
| <ul style="list-style-type: none"> <li>○ No</li> <li>○ Probablemente No</li> <li>○ Probablemente Si</li> <li>○ Si</li> <li>○ Es variable</li> <li>○ No se conoce</li> </ul> | <p>En las espondiloartropatías, el curso de la enfermedad usualmente se complica por manifestaciones extraarticulares como la psoriasis o la uveitis aguda anterior (UAA), esta última corresponde a una inflamación aguda no infecciosa del tracto uveal anterior y sus estructuras adyacentes(1). El diagnóstico temprano y tratamiento adecuado es crucial para evitar las complicaciones de la inflamación ocular crónica o recidivante, como la pérdida visual o ceguera.</p> <p>El uso de los DMARD biológicos podría afectar significativamente el pronóstico de la UAA asociada con espondiloartropatías y los anti TNF han mejorado el curso clínico y el número de recaídas de la UAA (4).</p> |                             |

| Efectos deseables (beneficios de la opción a recomendar)                                                                                                                                                                                                                                 |                                                                                                                                                                                                                                        |                                 |                          |  |                             |                                |                                 |                          |  |  |  |  |  |
|------------------------------------------------------------------------------------------------------------------------------------------------------------------------------------------------------------------------------------------------------------------------------------------|----------------------------------------------------------------------------------------------------------------------------------------------------------------------------------------------------------------------------------------|---------------------------------|--------------------------|--|-----------------------------|--------------------------------|---------------------------------|--------------------------|--|--|--|--|--|
| ¿Qué tan sustanciales son los efectos deseables de la opción?                                                                                                                                                                                                                            |                                                                                                                                                                                                                                        |                                 |                          |  |                             |                                |                                 |                          |  |  |  |  |  |
| JUICIO                                                                                                                                                                                                                                                                                   | EVIDENCIA DE LA INVESTIGACION                                                                                                                                                                                                          |                                 |                          |  | CONSIDERACIONES ADICIONALES |                                |                                 |                          |  |  |  |  |  |
| <div><div><div><div><div></div><div>Triviales</div></div><div><div></div><div>Pequeños</div></div><div><div></div><div>Moderados</div></div><div><div></div><div>Grandes</div></div><div><div></div><div>Varían</div></div><div><div></div><div>No se sabe</div></div></div></div></div> | <table><thead><tr><th>Desenlaces</th><th>Nº de participantes (estudios)</th><th>Certeza de la evidencia (GRADE)</th><th>Efecto Relativo (95% CI)</th></tr></thead><tbody><tr><td></td><td></td><td></td><td></td></tr></tbody></table> |                                 |                          |  | Desenlaces                  | Nº de participantes (estudios) | Certeza de la evidencia (GRADE) | Efecto Relativo (95% CI) |  |  |  |  |  |
| Desenlaces                                                                                                                                                                                                                                                                               | Nº de participantes (estudios)                                                                                                                                                                                                         | Certeza de la evidencia (GRADE) | Efecto Relativo (95% CI) |  |                             |                                |                                 |                          |  |  |  |  |  |
|                                                                                                                                                                                                                                                                                          |                                                                                                                                                                                                                                        |                                 |                          |  |                             |                                |                                 |                          |  |  |  |  |  |

|  |                          |         |          |                           |  |
|--|--------------------------|---------|----------|---------------------------|--|
|  | Adalimumab vs Etanercept | 760 (1) | Muy Baja | HR 3.86,<br>(1.85 a 8.06) |  |
|  | Infliximab vs Etanercept | 959 (1) | Muy Baja | HR 1.99,<br>(1.23 a 3.22) |  |
|  | Infliximab vs Adalimumab | 831 (1) | Muy Baja | HR 1.94<br>(0.91 to 4.16) |  |

## Efectos Indeseables

¿Qué tan sustanciales son los efectos indeseables que se pueden anticipar?

| JUICIO                                                                                                                                                                   | EVIDENCIA DE LA INVESTIGACION                                                                                                                                                                    | CONSIDERACIONES ADICIONALES |
|--------------------------------------------------------------------------------------------------------------------------------------------------------------------------|--------------------------------------------------------------------------------------------------------------------------------------------------------------------------------------------------|-----------------------------|
| <ul style="list-style-type: none"> <li>○ Triviales</li> <li>○ <b>Pequeños</b></li> <li>○ Moderados</li> <li>○ Grandes</li> <li>○ Varían</li> <li>○ No se sabe</li> </ul> | Los estudios identificaron un adecuado perfil de seguridad, con eventos adversos en su mayoría leves y dados por infecciones, esperado por el mecanismo de acción de los medicamentos evaluados, |                             |

## Certeza en la Evidencia

¿Cuál es la certeza en la evidencia global sobre los efectos de la opción a recomendar?

| JUICIO | EVIDENCIA DE LA INVESTIGACION | CONSIDERACIONES ADICIONALES |
|--------|-------------------------------|-----------------------------|
|--------|-------------------------------|-----------------------------|

| <input type="radio"/> Muy baja<br><input type="radio"/> Baja<br><input type="radio"/> Moderada<br><input type="radio"/> Alta<br><input type="radio"/> No se identificaron estudios                                                                                          | <table border="1"> <thead> <tr> <th>Desenlaces</th><th>Nº de participantes (estudios)</th><th>Certeza de la evidencia (GRADE)</th></tr> </thead> <tbody> <tr> <td>Uveitis anterior agudizada</td><td>1365 (1)</td><td>⊕○○○ Muy Baja</td></tr> </tbody> </table>                                                                                                                                                           | Desenlaces                      | Nº de participantes (estudios) | Certeza de la evidencia (GRADE) | Uveitis anterior agudizada | 1365 (1) | ⊕○○○ Muy Baja |  |
|-----------------------------------------------------------------------------------------------------------------------------------------------------------------------------------------------------------------------------------------------------------------------------|---------------------------------------------------------------------------------------------------------------------------------------------------------------------------------------------------------------------------------------------------------------------------------------------------------------------------------------------------------------------------------------------------------------------------|---------------------------------|--------------------------------|---------------------------------|----------------------------|----------|---------------|--|
| Desenlaces                                                                                                                                                                                                                                                                  | Nº de participantes (estudios)                                                                                                                                                                                                                                                                                                                                                                                            | Certeza de la evidencia (GRADE) |                                |                                 |                            |          |               |  |
| Uveitis anterior agudizada                                                                                                                                                                                                                                                  | 1365 (1)                                                                                                                                                                                                                                                                                                                                                                                                                  | ⊕○○○ Muy Baja                   |                                |                                 |                            |          |               |  |
| <b>Valores de los pacientes</b><br>¿Hay variación o poca certeza sobre cómo valoran las personas/los pacientes los desenlaces principales?                                                                                                                                  |                                                                                                                                                                                                                                                                                                                                                                                                                           |                                 |                                |                                 |                            |          |               |  |
| JUICIO                                                                                                                                                                                                                                                                      | EVIDENCIA DE LA INVESTIGACION                                                                                                                                                                                                                                                                                                                                                                                             | CONSIDERACIONES ADICIONALES     |                                |                                 |                            |          |               |  |
| <input type="radio"/> Variabilidad incertidumbre importante<br><input type="radio"/> Posiblemente hay variabilidad incertidumbre importante<br><input type="radio"/> Posiblemente No hay variabilidad incertidumbre importante<br><input type="radio"/> No hay variabilidad | El beneficio más frecuentemente percibido de la terapia IV con medicamentos biológicos estuvo relacionada con la supervisión que brinda el personal de salud. La mayoría de los pacientes (82% n=332) prefirió la terapia IV sobre la subcutánea, dentro de las razones de la preferencia está el no tener que auto inyectarse, menos frecuencia de dosis y la preferencia de aplicación por parte del personal de salud. |                                 |                                |                                 |                            |          |               |  |

|                                                                                                                                                                                                                                                                                                                                                                                          |                                                                                                                                                                                                         |                             |
|------------------------------------------------------------------------------------------------------------------------------------------------------------------------------------------------------------------------------------------------------------------------------------------------------------------------------------------------------------------------------------------|---------------------------------------------------------------------------------------------------------------------------------------------------------------------------------------------------------|-----------------------------|
| incertidumbre importante                                                                                                                                                                                                                                                                                                                                                                 |                                                                                                                                                                                                         |                             |
| <b>Balance de los efectos</b><br>¿El balance entre los efectos deseables e indeseables favorece la opción o el comparador?                                                                                                                                                                                                                                                               |                                                                                                                                                                                                         |                             |
| JUICIO                                                                                                                                                                                                                                                                                                                                                                                   | EVIDENCIA DE LA INVESTIGACION                                                                                                                                                                           | CONSIDERACIONES ADICIONALES |
| <input type="radio"/> Favorece al comparador<br><input type="radio"/> Probablemente favorece al comparador<br><input type="radio"/> No favorece al comparador ni a la opción en evaluación<br><input type="radio"/> Probablemente favorece a la opción<br><input checked="" type="radio"/> Favorece a la intervención<br><input type="radio"/> Varía<br><input type="radio"/> No se sabe | El balance favorece a la intervención, por el control sobre las agudizaciones de la UAA, agudeza visual y adecuado perfil de seguridad, con eventos adversos en su mayoría leves dados por infecciones. |                             |
| <b>Recursos requeridos</b><br>Qué tan grande es el requerimiento de recursos (costos)?                                                                                                                                                                                                                                                                                                   |                                                                                                                                                                                                         |                             |
| JUICIO                                                                                                                                                                                                                                                                                                                                                                                   | EVIDENCIA DE LA INVESTIGACION                                                                                                                                                                           | CONSIDERACIONES ADICIONALES |

|                                                                                                                                                                                                                                                         |                                                                                                                                                                                                                                                                                |                                                                                                                                                          |
|---------------------------------------------------------------------------------------------------------------------------------------------------------------------------------------------------------------------------------------------------------|--------------------------------------------------------------------------------------------------------------------------------------------------------------------------------------------------------------------------------------------------------------------------------|----------------------------------------------------------------------------------------------------------------------------------------------------------|
| <ul style="list-style-type: none"> <li>○ Grandes costos</li> <li>○ Costos moderados</li> <li>○ no significantes</li> <li>○ costos ni ahorros</li> <li>○ Moderados ahorros</li> <li>○ Grandes ahorros</li> <li>○ Varían</li> <li>○ No se sabe</li> </ul> | Un estudio cuyo objetivo fue evaluar costos de manifestaciones extraarticulares como uveítis en pacientes con EA, no logró identificar estudios, por lo que los clínicos definieron unos costos directos de la uveítis en Euros de 1.410 (Alemania) y de 2812 Euros (Francia). | Se considera que futuras evaluaciones económicas de anti TNF deben incorporar las manifestaciones extraarticulares y subsecuentes costos de tratamiento. |
|---------------------------------------------------------------------------------------------------------------------------------------------------------------------------------------------------------------------------------------------------------|--------------------------------------------------------------------------------------------------------------------------------------------------------------------------------------------------------------------------------------------------------------------------------|----------------------------------------------------------------------------------------------------------------------------------------------------------|

| Equidad                                                                                                                                                                                                                                                  |                                                  |                                                                                                                                                                                                                    |
|----------------------------------------------------------------------------------------------------------------------------------------------------------------------------------------------------------------------------------------------------------|--------------------------------------------------|--------------------------------------------------------------------------------------------------------------------------------------------------------------------------------------------------------------------|
| ¿La implementación de la opción, tendrá impacto en la equidad?                                                                                                                                                                                           |                                                  |                                                                                                                                                                                                                    |
| JUICIO                                                                                                                                                                                                                                                   | EVIDENCIA DE LA INVESTIGACION                    | CONSIDERACIONES ADICIONALES                                                                                                                                                                                        |
| <ul style="list-style-type: none"> <li>○ Reduce</li> <li>○ Probablemente se reduce la equidad</li> <li>○ Probablemente no impacta la equidad</li> <li>○ Probablemente incrementa</li> <li>○ Incrementa</li> <li>○ Varía</li> <li>○ No se sabe</li> </ul> | No se identificó información sobre este aspecto. | SE anticipa que dados los altos costos de los DMARDS biológicos y sus comparadores cualquiera de estos tratamientos puede aumentar la inequidad en salud por falta de acceso de las poblaciones menos favorecidas. |
| Aceptabilidad                                                                                                                                                                                                                                            |                                                  |                                                                                                                                                                                                                    |

| ¿Es la opción aceptada por los diferentes actores involucrados en su implementación?                                                                                                               |                                                                                                                                                                                                                                                                                                    |                                                                                                                                                                                                                                                                                                               |
|----------------------------------------------------------------------------------------------------------------------------------------------------------------------------------------------------|----------------------------------------------------------------------------------------------------------------------------------------------------------------------------------------------------------------------------------------------------------------------------------------------------|---------------------------------------------------------------------------------------------------------------------------------------------------------------------------------------------------------------------------------------------------------------------------------------------------------------|
| JUICIO                                                                                                                                                                                             | EVIDENCIA DE LA INVESTIGACION                                                                                                                                                                                                                                                                      | CONSIDERACIONES ADICIONALES                                                                                                                                                                                                                                                                                   |
| <ul style="list-style-type: none"> <li>○ No</li> <li>○ Probablemente no</li> <li><input checked="" type="radio"/> Probablemente si</li> <li>○ Si</li> <li>○ Varia</li> <li>○ No se sabe</li> </ul> | No se identificaron estudios que evalúen este aspecto.                                                                                                                                                                                                                                             | La guía colegio americano de reumatología y la Fundación nacional de psoriasis publicada en 2018 recomienda el inicio del tratamiento con anti TNF más metotrexato en pacientes con uveítis, basado en evidencia de muy baja calidad, basado en la respuesta que podría tener la uveítis al metotrexato (19). |
| Factibilidad                                                                                                                                                                                       |                                                                                                                                                                                                                                                                                                    |                                                                                                                                                                                                                                                                                                               |
| ¿Es la opción factible de IMPLEMENTAR?                                                                                                                                                             |                                                                                                                                                                                                                                                                                                    |                                                                                                                                                                                                                                                                                                               |
| JUICIO                                                                                                                                                                                             | EVIDENCIA DE LA INVESTIGACION                                                                                                                                                                                                                                                                      | CONSIDERACIONES ADICIONALES                                                                                                                                                                                                                                                                                   |
| <ul style="list-style-type: none"> <li>No</li> <li>○ Probablemente no</li> <li>○ Probablemente si</li> <li>○ Si</li> <li>○ Varia</li> <li><input checked="" type="radio"/> No se sabe</li> </ul>   | <p>No se encontraron estudios de factibilidad de pacientes con espondiloartritis y uveitis</p> <p>Las terapias evaluadas en la actual recomendación están disponibles en el país, el adalimumab y el etanercept fueron incluidos en el plan de beneficios para el manejo de espondiloartritis.</p> |                                                                                                                                                                                                                                                                                                               |

## Resumen de Juicios

|                         | JUICIOS                                     |                                                             |                                                              |                                                   |                                |       |                     |
|-------------------------|---------------------------------------------|-------------------------------------------------------------|--------------------------------------------------------------|---------------------------------------------------|--------------------------------|-------|---------------------|
| PROBLEMA                | No                                          | Probablemente no                                            | Probablemente si                                             | Si                                                |                                | Varia | No se sabe          |
| EFFECTOS DESEABLES      | Triviales                                   | Pequeños                                                    | Moderados                                                    | Grandes                                           |                                | Varia | No se sabe          |
| EFFECTOS INDESEABLES    | Grandes                                     | Moderados                                                   | Pequeños                                                     | Triviales                                         |                                | Varia | No se sabe          |
| CERTEZA EN LA EVIDENCIA | Muy Baja                                    | Baja                                                        | Moderada                                                     | Alta                                              |                                |       | No incluyó estudios |
| VALORES DE PACIENTES    | Importante<br>incertidumbre<br>variabilidad | Posiblemente<br>Importante<br>incertidumbre<br>variabilidad | Probablemente<br>Importante<br>incertidumbre<br>variabilidad | No<br>Importante<br>incertidumbre<br>variabilidad |                                |       |                     |
| BALANCE DE LOS EFECTOS  | Favorece<br>comparador                      | Probablemente<br>Favorece<br>comparador                     | No favorece<br>Ni la<br>intervención<br>ni el<br>comparador  | Probablemente<br>favorece<br>la<br>intervención   | Favorece<br>la<br>intervención | Varia | No se sabe          |
| RECURSOS REQUERIDOS     | Grandes costos                              | Moderados costos                                            | Costos y ahorros<br>insignificantes                          | Moderados ahorros                                 | Grandes ahorros                | Varia | No se sabe          |
| EQUIDAD                 | Reducida                                    | Probablemente<br>reducida                                   | Probablemente<br>no<br>impactada                             | Probablemente<br>incrementada                     | Incrementada                   | Varia | No se sabe          |
| ACEPTABILIDAD           | No                                          | Probablemente No                                            | Probablemente Si                                             | Si                                                |                                | Varia | No se sabe          |

| JUICIOS      |    |                  |                  |    |  |       |            |
|--------------|----|------------------|------------------|----|--|-------|------------|
| FACTIBILIDAD | No | Probablemente No | Probablemente Si | Si |  | Varia | No se sabe |

### Tipo de Recomendación

|                                             |                                                  |                                                                           |                                                |                                           |
|---------------------------------------------|--------------------------------------------------|---------------------------------------------------------------------------|------------------------------------------------|-------------------------------------------|
| Recomendación fuerte en contra de la opción | Recomendación condicional en contra de la opción | Recomendación condicional a favor de cualquiera la opción o su comparador | Recomendación condicional a favor de la opción | Recomendación fuerte a favor de la opción |
| <input type="radio"/>                       | <input type="radio"/>                            | <input type="radio"/>                                                     | <input checked="" type="radio"/>               | <input type="radio"/>                     |

### Conclusiones

#### Recomendación

En pacientes adultos con EspAp y uveítis (asociada como manifestación extra articular), con indicación de DMARDs Biológicos, se recomienda de forma condicional, el tratamiento con anti TNF $\alpha$  con el objetivo de reducir la tasa de uveítis anterior aguda. Certeza en la evidencia :muy baja.

A pesar de que la evidencia es limitada, basada en estudios observacionales y comparación indirecta, se podría recomendar uso de adalimumab y infliximab sobre el etanercept.

#### Justificación

El panel considero que el balance de los efectos favorece a la intervención con anti TNF $\alpha$  (sus potenciales beneficios pueden superar los riesgos). Tuvo en consideración: La evidencia se basa en estudios observacionales y comparación indirecta (los pacientes en los dos años previos no habían presentado UAA) los cuales han mostrado en general menores tasa de UAA con el uso de adalimumab y infliximab comparado con Etanercept. La evidencia con golimumab es limitada.

Con respecto a los desenlaces de seguridad, tres estudios que compararon el MTX y inhibidor de TNF (etanercept) en combinación con la monoterapia con etanercept, no encontraron diferencias estadísticamente con respecto a infecciones serias, infección, eventos hepáticos.

### Consideraciones por subgrupos

No se identificaron consideraciones por subgrupos

### Consideraciones de implementación

La terapia debe ser formulada por medicina especializada ( reumatología – oftalmología), los medicamentos evaluados estan disponibles en el país y el adalimumab y etanercept fueron incluidos en el plan de beneficios para el manejo de espondiloartritis.

### Prioridades de investigación futura

Se requiere de estudios tipo ensayos clínicos aleatorios que evaluen la efectividad y especialmente seguridad de la terapia con biologicos en pacientes con espondiloartritis y uveitis aguda anterior, dado el importante compromiso funcional que genera esta complicación.

## Referencias

1. Biggioggero M, Crotti C, Becciolini A, Miserocchi E, Favalli EG. The Management of Acute Anterior Uveitis Complicating Spondyloarthritis: Present and Future [Internet]. Vol. 2018, BioMed Research International. Hindawi; 2018 [citado 7 de agosto de 2020]. p. e9460187. Disponible en: <https://www.hindawi.com/journals/bmri/2018/9460187/>
2. Arepalli S, Rosenbaum JT. The use of biologics for uveitis associated with spondyloarthritis. *Curr Opin Rheumatol*. 2019;31(4):349-54.
3. Levy-Clarke G, Jabs DA, Read RW, Rosenbaum JT, Vitale A, Van Gelder RN. Expert panel recommendations for the use of anti-tumor necrosis factor biologic agents in patients with ocular inflammatory disorders. *Ophthalmology*. marzo de 2014;121(3):785-796.e3.
4. Braun J, Baraliakos X, Listing J, Sieper J. Decreased incidence of anterior uveitis in patients with ankylosing spondylitis treated with the anti-tumor necrosis factor agents infliximab and etanercept. *Arthritis Rheum*. agosto de 2005;52(8):2447-51.
5. Rudwaleit M, Rødevand E, Holck P, Vanhoof J, Kron M, Kary S, et al. Adalimumab effectively reduces the rate of anterior uveitis flares in patients with active ankylosing spondylitis: results of a prospective open-label study. *Ann Rheum Dis* [Internet]. 28 de julio de 2008 [citado 8 de agosto de 2020];68(5):696-701. Disponible en: <https://www.ncbi.nlm.nih.gov/pmc/articles/PMC2663712/>
6. Faez S, Lobo A-M, Sobrin L, Papaliodis GN. Treatment of seronegative spondyloarthropathy-associated uveitis with golimumab: retrospective case series. *Clin Experiment Ophthalmol*. junio de 2014;42(4):392-5.
7. Dobner BC, Max R, Becker MD, Heinz C, Veltrup I, Heiligenhaus A, et al. A three-centre experience with adalimumab for the treatment of non-infectious uveitis. *Br J Ophthalmol*. febrero de 2013;97(2):134-8.
8. van Denderen JC, Visman IM, Nurmohamed MT, Suttorp-Schulten MSA, van der Horst-Bruinsma IE. Adalimumab significantly reduces the recurrence rate of anterior uveitis in patients with ankylosing spondylitis. *J Rheumatol*. septiembre de 2014;41(9):1843-8.
9. M.V.Hernández, M. Mesquida, V. Llorens. Effectiveness of Certolizumab Pegol in Patients with Uveitis Refractory to Other Tumor Necrosis Factor Inhibitors. Report of 22 Cases. *Arthritis Rheum*. 2016;68(10).

## GPC para pacientes con Espondiloartritis Periférica ASOREUMA

10. Yazgan S, Celik U, Işık M, Yeşil NK, Baki AE, Şahin H, et al. Efficacy of golimumab on recurrent uveitis in HLA-B27-positive ankylosing spondylitis. *Int Ophthalmol*. febrero de 2017;37(1):139-45.
11. Golimumab in refractory uveitis related to spondyloarthritis. Multicenter study of 15 patients - ScienceDirect [Internet]. [citado 9 de octubre de 2020]. Disponible en: <https://www.sciencedirect.com/science/article/pii/S0049017216000925>
12. Anti-TNF $\alpha$  Treatment for HLA-B27-Positive Ankylosing Spondylitis-Related Uveitis - American Journal of Ophthalmology [Internet]. [citado 9 de octubre de 2020]. Disponible en: [https://www.ajo.com/article/S0002-9394\(16\)30360-9/abstract](https://www.ajo.com/article/S0002-9394(16)30360-9/abstract)
13. Lee S, Park YJ, Lee JY. The Effect of Tumor Necrosis Factor-Alpha Inhibitors on Uveitis in Patients with Ankylosing Spondylitis. *J Korean Med Sci* [Internet]. 18 de octubre de 2019 [citado 21 de noviembre de 2020];34(42). Disponible en: <https://www.ncbi.nlm.nih.gov/pmc/articles/PMC6823519/>
14. El-Shabrawi Y, Hermann J. Anti-tumor necrosis factor-alpha therapy with infliximab as an alternative to corticosteroids in the treatment of human leukocyte antigen B27-associated acute anterior uveitis. *Ophthalmology*. diciembre de 2002;109(12):2342-6.
15. Ward MM, Deodhar A, Gensler LS, Dubreuil M, Yu D, Khan MA, et al. 2019 Update of the American College of Rheumatology/Spondylitis Association of America/Spondyloarthritis Research and Treatment Network Recommendations for the Treatment of Ankylosing Spondylitis and Nonradiographic Axial Spondyloarthritis. *Arthritis Care Res*. 2019;71(10):1285-99.
16. Lie E, Lindström U, Zverkova-Sandström T, Olsen IC, Forsblad-d'Elia H, Askling J, et al. Tumour necrosis factor inhibitor treatment and occurrence of anterior uveitis in ankylosing spondylitis: results from the Swedish biologics register. *Ann Rheum Dis*. septiembre de 2017;76(9):1515-21.
17. Bolge SC, Eldridge HM, Lofland JH, Ravin C, Hart PJ, Ingham MP. Patient experience with intravenous biologic therapies for ankylosing spondylitis, Crohn's disease, psoriatic arthritis, psoriasis, rheumatoid arthritis, and ulcerative colitis. *Patient Prefer Adherence*. 2017;11:661-9.
18. Gao X, Wendling D, Botteman MF, Carter JA, Rao S, Cifaldi M. Clinical and economic burden of extra-articular manifestations in ankylosing spondylitis patients treated with anti-tumor necrosis factor agents. *J Med Econ*. 2012;15(6):1054-63.

## GPC para pacientes con Espondiloartritis Periférica ASOREUMA

19. Singh JA, Guyatt G, Ogdie A, Gladman DD, Deal C, Deodhar A, et al. 2018 American College of Rheumatology/National Psoriasis Foundation Guideline for the Treatment of Psoriatic Arthritis. *Arthritis Care Res* [Internet]. 2019 [citado 18 de octubre de 2020];71(1):2-29. Disponible en: <https://onlinelibrary.wiley.com/doi/abs/10.1002/acr.23789>

## GPC para pacientes con Espondiloartritis Periférica ASOREUMA

Pregunta 7. ¿En el tratamiento de pacientes adultos con Espondiloartritis Periférica y enfermedad inflamatoria intestinal asociada, se debe usar DMARDs convencionales dada su efectividad en el control de la enfermedad y su perfil de seguridad?

|                     |                                                                                                  |         |
|---------------------|--------------------------------------------------------------------------------------------------|---------|
| <b>Población</b>    | Pacientes adultos con Espondiloartritis Periférica y enfermedad inflamatoria intestinal asociada |         |
| <b>Intervención</b> | DMARD convencionales (metotrexate, sulfasalazina, ciclosporina, leflunomida)                     |         |
| <b>Comparación</b>  | Cuidado estándar/placebo                                                                         |         |
| <b>Desenlaces</b>   | Control enfermedad- Remisión/baja actividad de síntomas                                          | Crítico |
|                     | Control enfermedad- Mejoría en escalas de funcionalidad                                          | Crítico |
|                     | Control enfermedad- progresión radiográfica                                                      | Crítico |
|                     | calidad de vida                                                                                  | Crítico |
|                     | Perfil de seguridad: Eventos adversos                                                            | Crítico |

### Antecedentes

La enfermedad inflamatoria intestinal (EII) es una enfermedad inflamatoria crónica del tracto gastrointestinal, la enfermedad de Crohn y la colitis ulcerativa son las principales formas de esta entidad, en las últimas dos décadas la prevalencia de la EII ha incrementado en los países en desarrollo, con un incremento anual de 14.9% para colitis ulcerativa y de 11.1% para la enfermedad de Crohn(1).

La asociación entre la enfermedad inflamatoria intestinal y las enfermedades reumatológicas es frecuente, dicha asociación genera mayores retos en el tratamiento de los pacientes y peores desenlaces clínicos. (2) A la fecha no hay guías integradas disponibles para orientar y optimizar el tratamiento farmacológico de estos pacientes (3) pero cada vez existe más conciencia en la clínica de la importancia del manejo conjunto entre reumatólogos y gastroenterólogos.

Una revisión sistemática publicada en 2018 mostró una asociación significativa entre la enfermedad de Crohn y la colitis ulcerativa con la psoriasis, así mismo los pacientes con psoriasis tienen un riesgo incrementado de cursar con EII (1). Estas entidades aparte de compartir el compromiso inflamatorio crónico del epitelio han mostrado características genéticas comunes con una prevalencia elevada del HLA-B27 (4)

## Efectividad y seguridad

La búsqueda de la literatura realizada no identificó ningún estudio que haya evaluado la intervención de interés, por lo que se pasó a revisar las Guías de Práctica Clínica para identificar posibles fuentes de información y evaluar la pertinencia de adoptar algunas de sus recomendaciones sobre esta pregunta.

Se identificó que la guía para el tratamiento de la Artritis psoriásica del Colegio Americano de Reumatología y la Fundación Nacional de Psoriasis, publicada en 2018 (5) generó recomendaciones para pacientes adultos con Artritis psoriásica (APs) activa y enfermedad inflamatoria intestinal activa quienes eran naive tanto para DMARD convencionales como para terapia biológica. Esta GPC tiene un puntaje de evaluación AGREEII > 15 para todos sus dominios, según los 4 evaluadores que la calificaron, como parte del desarrollo de esta guía. Con lo cual se consideran sus recomendaciones válidas para ser adoptadas.

### *Recomendaciones y la evidencia que la soporta (5).*

Se recomendó de forma condicional, basado en evidencia de muy baja calidad, el inicio de terapia biológica con anticuerpos monoclonales anti TNF sobre los DMARD convencionales. Pero podría considerarse el inicio del tratamiento con DMARD convencionales si el paciente prefiere una medicación oral, o si el paciente tiene contraindicaciones para la terapia biológica (falla cardíaca congestiva, infecciones previas serias, infecciones recurrentes, enfermedades desmielinizantes).

La evidencia que soporta la recomendación fue generada de forma indirecta por medio de una revisión sistemática que incluyó 3 ensayos clínicos aleatorios (6), los estudios incluyeron pacientes con colitis ulcerativa aguda sin tratamiento previo con DMARD convencionales o terapia biológica y compararon el tratamiento con infliximab vs ciclosporina. No se encontraron diferencias significativas con respecto a la respuesta a tratamiento OR 1.08 IC 95% (0.73-1.6) I<sup>2</sup>:0%, las colectomías a los 3 y 12 meses no mostraron diferencias estadísticamente significativas con OR 1.00, 95% IC 0.64–1.59,  $\chi^2 = 0.34$ , I<sup>2</sup> = 0% y OR IC 95% 0.76 (0.51 a 1.14) respectivamente. No se encontraron diferencias con respecto a eventos adversos relacionados con el medicamento OR IC 95% 1.78 (0.97 a 3.27), complicaciones posoperatorias, eventos adversos serios OR IC 95% 1.41 (0.69-2.88) [Apéndice 1](#).

Adicionalmente se recomendó de forma condicional basado en evidencia de muy baja calidad el tratamiento con DMARD convencionales sobre la terapia biológica con inhibidores de IL12-23 en pacientes naive a tratamiento. Las búsquedas en la literatura no identificaron ningún estudio que soportara esta pregunta (recomendación de expertos)

## GPC para pacientes con Espondiloartritis Periférica ASOREUMA

### Valores y preferencia de pacientes

Ayano y cols.(7) publicaron en 2017 una síntesis cualitativa a cerca de las experiencias y actitudes de los pacientes hacia los DMARD en pacientes con artritis reumatoide y espondiloartritis. Se incluyeron 56 estudios, de los cuales 191 pacientes tenían diagnóstico de espondiloartritis. Se encontró que los pacientes creen que los DMARD pueden incrementar el riesgo de cáncer y daño de órgano por lo que explicar los beneficios de esta terapia incrementara la aceptación y adherencia y reducirá los miedos de toxicidad a largo plazo.

Los pacientes perciben los DMARD como una medicación fuerte, la confianza en el cuidado médico, experiencias positivas con DMARD de otros pacientes y expectativas a cerca del rol de la medicación ayudando a mantener la participación en la vida diaria puede motivar su uso.

### Costos

No se identificaron estudios que hayan evaluado el consumo de recursos de la intervención en pacientes con compromiso intestinal, ni el impacto económico de la misma.

## Pregunta 7: Marco de trabajo –De la evidencia a las decisiones

| <b>PREGUNTA</b>               |                                                                                                                          |
|-------------------------------|--------------------------------------------------------------------------------------------------------------------------|
| <b>POBLACION</b>              | <i>Pacientes adultos con Espondiloartritis Periférica y enfermedad inflamatoria intestinal asociada</i>                  |
| <b>INTERVENCIÓN</b>           | <i>DMARD convencionales (metotrexate, sulfasalazina, ciclosporina, leflunomida)</i>                                      |
| <b>COMPARACIÓN</b>            | <i>Cuidado estándar/placebo</i>                                                                                          |
| <b>DESENLACES PRINCIPALES</b> | <i>Efectividad: control enfermedad<br/>remisión/baja actividad de síntomas<br/>Perfil de seguridad: Eventos adversos</i> |
| <b>ÁMBITO</b>                 | <i>Ambulatorio</i>                                                                                                       |
| <b>PERSPECTIVA</b>            | <i>Recomendación de GPC en el contexto de espondiloartritis</i>                                                          |
| <b>CONFLICTO DE INTERÉS:</b>  | <i>No hay ninguna declaración de conflictos de interés</i>                                                               |

## Evaluación

| <b>Problema</b><br>Es el problema una prioridad? |                                      |                                    |
|--------------------------------------------------|--------------------------------------|------------------------------------|
| <b>JUICIO</b>                                    | <b>EVIDENCIA DE LA INVESTIGACION</b> | <b>CONSIDERACIONES ADICIONALES</b> |

|                                                                                                                                                                             |                                                                                                                                                                                                                                                                                                                                                                                                                                                                                   |  |
|-----------------------------------------------------------------------------------------------------------------------------------------------------------------------------|-----------------------------------------------------------------------------------------------------------------------------------------------------------------------------------------------------------------------------------------------------------------------------------------------------------------------------------------------------------------------------------------------------------------------------------------------------------------------------------|--|
| <ul style="list-style-type: none"> <li>○ No</li> <li>○ Probablemente No</li> <li>○ Probablemente Si</li> <li>○ Si</li> <li>○ Es variable</li> <li>○ No se conoce</li> </ul> | La asociación entre la enfermedad inflamatoria intestinal y las enfermedades reumatológicas es frecuente, dicha asociación genera mayores retos en el tratamiento de los pacientes y peores desenlaces clínicos. (2) A la fecha no hay guías integradas disponibles para orientar y optimizar el tratamiento farmacológico de estos pacientes (3) pero cada vez existe más conciencia en la clínica de la importancia del manejo conjunto entre reumatólogos y gastroenterólogos. |  |
|-----------------------------------------------------------------------------------------------------------------------------------------------------------------------------|-----------------------------------------------------------------------------------------------------------------------------------------------------------------------------------------------------------------------------------------------------------------------------------------------------------------------------------------------------------------------------------------------------------------------------------------------------------------------------------|--|

### Efectos deseables (beneficios de la opción a recomendar)

¿Qué tan sustanciales son los efectos deseables de la opción?

| JUICIO                                                                                                                                                | EVIDENCIA DE LA INVESTIGACION                                                                                                                                                                         |                                                                                                                              |  |  |  | CONSIDERACIONES ADICIONALES |
|-------------------------------------------------------------------------------------------------------------------------------------------------------|-------------------------------------------------------------------------------------------------------------------------------------------------------------------------------------------------------|------------------------------------------------------------------------------------------------------------------------------|--|--|--|-----------------------------|
| <div><div><div>○ Triviales</div><div>○ Pequeños</div><div>○ Moderados</div><div>○ Grandes</div><div>○ Varían</div><div>○ No se sabe</div></div></div> |                                                                                                                                                                                                       |                                                                                                                              |  |  |  |                             |
|                                                                                                                                                       |                                                                                                                                                                                                       |                                                                                                                              |  |  |  |                             |
|                                                                                                                                                       | <div><div>Desenlaces</div><div>Nº de participantes (estudios)</div><div>Certeza de la evidencia (GRADE)</div><div>Efecto Relativo (95% CI)</div><div>Efecto absoluto anticipado* (95% CI)</div></div> | <div><div>Respuesta al tratamiento</div><div>3 ECAs (415)</div><div>Muy Baja</div><div>OR 1.08 IC 95% (0.73-1.6)</div></div> |  |  |  |                             |

| Efectos Indeseables                                                                                                                                               |                               |                                |                                 |                                |                                      |                             |
|-------------------------------------------------------------------------------------------------------------------------------------------------------------------|-------------------------------|--------------------------------|---------------------------------|--------------------------------|--------------------------------------|-----------------------------|
| ¿Qué tan sustanciales son los efectos indeseables que se pueden anticipar?                                                                                        |                               |                                |                                 |                                |                                      |                             |
| JUICIO                                                                                                                                                            | EVIDENCIA DE LA INVESTIGACION |                                |                                 |                                |                                      | CONSIDERACIONES ADICIONALES |
| <ul style="list-style-type: none"> <li>○ Triviales</li> <li>○ Pequeños</li> <li>○ Moderados</li> <li>○ Grandes</li> <li>○ Varían</li> <li>○ No se sabe</li> </ul> |                               |                                |                                 |                                |                                      |                             |
|                                                                                                                                                                   | Desenlaces                    | Nº de participantes (estudios) | Certeza de la evidencia (GRADE) | Efecto Relativo (95% CI)       | Efecto absoluto anticipado* (95% CI) |                             |
|                                                                                                                                                                   | Eventos adversos serios       | 3 ECAs (415)                   | Muy Baja                        | Risk ratio 1.41 (0.73 to 2.71) |                                      |                             |
| Certeza en la Evidencia                                                                                                                                           |                               |                                |                                 |                                |                                      |                             |
| ¿Cuál es la certeza en la evidencia global sobre los efectos de la opción a recomendar?                                                                           |                               |                                |                                 |                                |                                      |                             |
| JUICIO                                                                                                                                                            | EVIDENCIA DE LA INVESTIGACION |                                |                                 |                                |                                      | CONSIDERACIONES ADICIONALES |

|                                                                                                                                                                                                                                                                                  |                                                                                                                                                                                                                                                                                       |                             |                                    |
|----------------------------------------------------------------------------------------------------------------------------------------------------------------------------------------------------------------------------------------------------------------------------------|---------------------------------------------------------------------------------------------------------------------------------------------------------------------------------------------------------------------------------------------------------------------------------------|-----------------------------|------------------------------------|
| <ul style="list-style-type: none"> <li>○ Muy baja</li> <li>○ Baja</li> <li>○ Moderada</li> <li>○ Alta</li> <li>○ No se identificaron estudios</li> </ul>                                                                                                                         |                                                                                                                                                                                                                                                                                       |                             |                                    |
|                                                                                                                                                                                                                                                                                  | <b>Desenlace</b>                                                                                                                                                                                                                                                                      | <b>Importancia Relativa</b> |                                    |
|                                                                                                                                                                                                                                                                                  | Respuesta al tratamiento                                                                                                                                                                                                                                                              | CRITICAL                    |                                    |
|                                                                                                                                                                                                                                                                                  | Eventos adversos serios                                                                                                                                                                                                                                                               | CRITICAL                    |                                    |
|                                                                                                                                                                                                                                                                                  |                                                                                                                                                                                                                                                                                       |                             |                                    |
| <b>Valores de los pacientes</b><br>¿Hay variación o poca certeza sobre cómo valoran las personas/los pacientes los desenlaces principales?                                                                                                                                       |                                                                                                                                                                                                                                                                                       |                             |                                    |
| <b>JUICIO</b>                                                                                                                                                                                                                                                                    | <b>EVIDENCIA DE LA INVESTIGACION</b>                                                                                                                                                                                                                                                  |                             | <b>CONSIDERACIONES ADICIONALES</b> |
| <ul style="list-style-type: none"> <li>○ Variabilidad o incertidumbre importante</li> <li>○ Posiblemente hay variabilidad o incertidumbre importante</li> <li>○ Posiblemente</li> <li>No hay variabilidad o incertidumbre importante</li> <li>○ No hay variabilidad o</li> </ul> | Los pacientes perciben los DMARD como una medicación fuerte, pero la confianza en el cuidado médico, experiencias positivas con DMARD de otros pacientes y expectativas a cerca del rol de la medicación ayudando a mantener la participación en la vida diaria puede motivar su uso. |                             |                                    |

|                                                                                                                                                                                                                                                                                                                         |                                      |                                    |
|-------------------------------------------------------------------------------------------------------------------------------------------------------------------------------------------------------------------------------------------------------------------------------------------------------------------------|--------------------------------------|------------------------------------|
| incertidumbre importante                                                                                                                                                                                                                                                                                                |                                      |                                    |
| <b>Balance de los efectos</b><br>¿El balance entre los efectos deseables e indeseables favorece la opción o el comparador?                                                                                                                                                                                              |                                      |                                    |
| <b>JUICIO</b>                                                                                                                                                                                                                                                                                                           | <b>EVIDENCIA DE LA INVESTIGACION</b> | <b>CONSIDERACIONES ADICIONALES</b> |
| <ul style="list-style-type: none"> <li>○ Favorece al comparador</li> <li>○ Probablemente favorece al comparador</li> <li>○ No favorece al comparador ni a la opción en evaluación</li> <li>○ Probablemente favorece a la opción</li> <li>○ Favorece a la intervención</li> <li>○ Varia</li> <li>○ No se sabe</li> </ul> |                                      |                                    |
| <b>Recursos Requeridos</b><br>Qué tan grande es el requerimiento de recursos?                                                                                                                                                                                                                                           |                                      |                                    |

| JUICIO                                                                                                                                                                                                                                       | EVIDENCIA DE LA INVESTIGACION                                                                            | CONSIDERACIONES ADICIONALES |
|----------------------------------------------------------------------------------------------------------------------------------------------------------------------------------------------------------------------------------------------|----------------------------------------------------------------------------------------------------------|-----------------------------|
| <ul style="list-style-type: none"> <li>○ Grandes costos</li> <li>○ Costos moderados</li> <li>○ no significantes costos ni ahorros</li> <li>○ Moderados ahorros</li> <li>○ Grandes ahorros</li> <li>○ Varían</li> <li>○ No se sabe</li> </ul> | No se identificaron estudios que evalúen los costos ni recursos requeridos al usar estas intervenciones. |                             |

### Equidad

¿La implementación de la opción, tendrá impacto en la equidad?

| JUICIO                                                                                                                                                  | EVIDENCIA DE LA INVESTIGACION | CONSIDERACIONES ADICIONALES |
|---------------------------------------------------------------------------------------------------------------------------------------------------------|-------------------------------|-----------------------------|
| <ul style="list-style-type: none"> <li>○ Reduce</li> <li>○ Probablemente se reduce la equidad</li> <li>○ Probablemente no impacta la equidad</li> </ul> |                               |                             |

|                                                                                                                                                                     |                                                                                                                                                                                                                                                                                                                                                                                                              |                                    |
|---------------------------------------------------------------------------------------------------------------------------------------------------------------------|--------------------------------------------------------------------------------------------------------------------------------------------------------------------------------------------------------------------------------------------------------------------------------------------------------------------------------------------------------------------------------------------------------------|------------------------------------|
| <ul style="list-style-type: none"> <li>○ Probablemente incrementa</li> <li>○ Incrementa</li> <li>○ Varía</li> <li>○ No se sabe</li> </ul>                           |                                                                                                                                                                                                                                                                                                                                                                                                              |                                    |
| <b>Aceptabilidad</b><br>¿Es la opción aceptada por los diferentes actores involucrados en su implementación?                                                        |                                                                                                                                                                                                                                                                                                                                                                                                              |                                    |
| <b>JUICIO</b>                                                                                                                                                       | <b>EVIDENCIA DE LA INVESTIGACION</b>                                                                                                                                                                                                                                                                                                                                                                         | <b>CONSIDERACIONES ADICIONALES</b> |
| <ul style="list-style-type: none"> <li>○ No</li> <li>○ Probablemente no</li> <li>○ Probablemente sí</li> <li>○ Si</li> <li>○ Varía</li> <li>○ No se sabe</li> </ul> | La guía colegio americano de reumatología y la Fundación nacional de psoriasis publicada en 2018 recomienda el inicio del tratamiento con DMARD convencionales en caso de que el paciente prefiera una medicación oral, o si el paciente tiene contraindicaciones para la terapia biológica (falla cardíaca congestiva, infecciones previas serias, infecciones recurrentes, enfermedades desmielinizantes). |                                    |
| <b>Factibilidad</b><br>¿Es la opción factible de IMPLEMENTAR?                                                                                                       |                                                                                                                                                                                                                                                                                                                                                                                                              |                                    |
| <b>JUICIO</b>                                                                                                                                                       | <b>EVIDENCIA DE LA INVESTIGACION</b>                                                                                                                                                                                                                                                                                                                                                                         | <b>CONSIDERACIONES ADICIONALES</b> |
| <ul style="list-style-type: none"> <li>No</li> <li>○ Probablemente</li> </ul>                                                                                       | No se encontraron estudios de factibilidad.                                                                                                                                                                                                                                                                                                                                                                  | SE considera factible para el      |

|                                                                                                                                                           |  |                                                                                                                                   |
|-----------------------------------------------------------------------------------------------------------------------------------------------------------|--|-----------------------------------------------------------------------------------------------------------------------------------|
| no<br><input type="radio"/> Probablemente<br>si<br><input type="radio"/> Si<br><input type="radio"/> Varia<br><input checked="" type="radio"/> No se sabe |  | país dadas la considciones actuales de disponibilidad de los medicamentos y su inclusion en la lista de medicamentos escenciales. |
|-----------------------------------------------------------------------------------------------------------------------------------------------------------|--|-----------------------------------------------------------------------------------------------------------------------------------|

## Resumen de Juicios

|                         | JUICIOS                                 |                                                      |                                                          |                                            |                          |       |                     |
|-------------------------|-----------------------------------------|------------------------------------------------------|----------------------------------------------------------|--------------------------------------------|--------------------------|-------|---------------------|
| PROBLEMA                | No                                      | Probablemente no                                     | Probablemente si                                         | Si                                         |                          | Varia | No se sabe          |
| EFFECTOS DESEABLES      | Triviales                               | Pequeños                                             | Moderados                                                | Grandes                                    |                          | Varia | No se sabe          |
| EFFECTOS INDESEABLES    | Grandes                                 | Moderados                                            | Pequeños                                                 | Triviales                                  |                          | Varia | No se sabe          |
| CERTEZA EN LA EVIDENCIA | Muy Baja                                | Baja                                                 | Moderada                                                 | Alta                                       |                          |       | No incluyó estudios |
| VALORES DE PACIENTES    | Importante incertidumbre o variabilidad | Posiblemente Importante incertidumbre o variabilidad | Probablemente No Importante incertidumbre o variabilidad | No Importante incertidumbre o variabilidad |                          |       |                     |
| BALANCE DE LOS EFECTOS  | Favorece el comparador                  | Probablemente Favorece el comparador                 | No favorece Ni la intervención ni el comparador          | Probablemente favorece la intervención     | Favorece la intervención | Varia | No se sabe          |
| RECURSOS                | Grandes costos                          | Moderados                                            | Costos y                                                 | Moderados                                  | Grandes                  | Varia | No se sabe          |

|               | JUICIOS  |                        |                            |                            |              |       |            |
|---------------|----------|------------------------|----------------------------|----------------------------|--------------|-------|------------|
| REQUERIDOS    |          | costos                 | ahorros insignificantes    | ahorros                    | ahorros      |       |            |
| EQUIDAD       | Reducida | Probablemente reducida | Probablemente no impactada | Probablemente incrementada | Incrementada | Varia | No se sabe |
| ACEPTABILIDAD | No       | Probablemente No       | Probablemente Si           | Si                         |              | Varia | No se sabe |
| FACTIBILIDAD  | No       | Probablemente No       | Probablemente Si           | Si                         |              | Varia | No se sabe |

#### Tipo de Recomendación

| Recomendación fuerte en contra de la opción | Recomendación condicional en contra de la opción | Recomendación condicional a favor de cualquiera la opción o su comparador | Recomendación condicional a favor de la opción | Recomendación fuerte a favor de la opción |
|---------------------------------------------|--------------------------------------------------|---------------------------------------------------------------------------|------------------------------------------------|-------------------------------------------|
| ○                                           | ○                                                | ○                                                                         | ○                                              | ○                                         |

#### Conclusiones

##### Recomendación

En pacientes con EspAp y enfermedad inflamatoria intestinal asociada, se recomienda el inicio de tratamiento con DMARDs convencionales. Recomendación condicional a favor de la intervención. Certeza de la evidencia muy baja.

##### Justificación

El panel por consenso decide recomendar el uso de DMARDs convencionales porque considera que el balance de los efectos favorece el uso de esta intervención, dados los potenciales beneficios (moderados) y los bajos efectos indeseables observados con estas terapias en los muchos otros manejos en los que se usan (evidencia indirecta).

### **Consideraciones por subgrupos**

No se identifican subgrupos de riesgo diferencial.

### **Consideraciones de implementación**

Los tratamientos ya hacen parte de muchos manejos en el país, no se identifican problemas en su implementación.

### **Monitoreo y evaluación de cumplimiento**

Es necesario un monitoreo periódico de los pacientes bajo este tratamiento en busca de eventos adversos a largo plazo.

### **Prioridades de investigación futura**

Se requieren estudios de seguimiento de pacientes con espondiloartritis que cursan con enfermedad inflamatoria intestinal en la que se valoren los efectos de los tratamientos a largo plazo.

## Referencias

1. Fu Y, Lee C-H, Chi C-C. Association of Psoriasis With Inflammatory Bowel Disease: A Systematic Review and Meta-analysis. *JAMA Dermatol*. 01 de 2018;154(12):1417-23.
2. Felice C, Pugliese D, Papparella LG, Pizzolante F, Onori E, Gasbarrini A, et al. Clinical management of rheumatologic conditions co-occurring with inflammatory bowel diseases. *Expert Rev Clin Immunol*. 2018;14(9):751-9.
3. Armuzzi A, Felice C, Lubrano E, Cantini F, Castiglione F, Gionchetti P, et al. Multidisciplinary management of patients with coexisting inflammatory bowel disease and spondyloarthritis: A Delphi consensus among Italian experts. *Dig Liver Dis Off J Ital Soc Gastroenterol Ital Assoc Study Liver*. diciembre de 2017;49(12):1298-305.
4. Molto A, Sieper J. Peripheral spondyloarthritis: Concept, diagnosis and treatment. *Best Pract Res Clin Rheumatol* [Internet]. 1 de junio de 2018 [citado 2 de agosto de 2020];32(3):357-68. Disponible en: <http://www.sciencedirect.com/science/article/pii/S1521694219300324>
5. al JAS et. 2018 American College of Rheumatology/National Psoriasis Foundation Guideline for the Treatment of Psoriatic Arthritis | Kopernio [Internet]. [citado 23 de julio de 2020]. Disponible en: <https://kopernio.com/viewer?doi=10.1002%2Facr.23789&token=WzExMzQ3NTYsIjEwLjEwMDIvYWNYLjIzNzg5Il0.HRKTIZjSJrmleOUCnv7GG4F0FCY>
6. Narula N, Marshall JK, Colombel J-F, Leontiadis GI, Williams JG, Muqtadir Z, et al. Systematic Review and Meta-Analysis: Infliximab or Cyclosporine as Rescue Therapy in Patients With Severe Ulcerative Colitis Refractory to Steroids. *Am J Gastroenterol*. 2016;111(4):477-91.
7. Kelly A, Tymms K, Tunnicliffe DJ, Sumpton D, Perera C, Fallon K, et al. Patients' Attitudes and Experiences of Disease-Modifying Antirheumatic Drugs in Rheumatoid Arthritis and Spondyloarthritis: A Qualitative Synthesis. *Arthritis Care Res* [Internet]. abril de 2018 [citado 10 de junio de 2020];70(4):525-32. Disponible en: <https://www.ncbi.nlm.nih.gov/pmc/articles/PMC5901029/>

## GPC para pacientes con Espondiloartritis Periférica ASOREUMA

Pregunta 8. ¿En el tratamiento de pacientes adultos con Espondiloartritis Periférica y enfermedad inflamatoria intestinal asociada, se debe usar DMARDs Biológicos (anti TNF $\alpha$ , anti IL-17, anti IL12-23, inhibidores JAK) dada su efectividad en el control enfermedad, y perfil de seguridad?

|                     |                                                                                                  |         |
|---------------------|--------------------------------------------------------------------------------------------------|---------|
| <b>Población</b>    | Pacientes adultos con Espondiloartritis Periférica y enfermedad inflamatoria intestinal asociada |         |
| <b>Intervención</b> | DMARD biológicos (Anti TNF, anti IL-17, Anti 12-23, inhibidores JAK)                             |         |
| <b>Comparación</b>  | DMARDs sintéticos o convencionales                                                               |         |
| <b>Desenlaces</b>   | Control enfermedad- Remisión/baja actividad de síntomas                                          | Crítico |
|                     | Control enfermedad- Mejoría en escalas de funcionalidad                                          | Crítico |
|                     | Control enfermedad- progresión radiográfica                                                      | Crítico |
|                     | calidad de vida                                                                                  | Crítico |
|                     | Perfil de seguridad: Eventos adversos                                                            | Crítico |

## Antecedentes

La enfermedad inflamatoria intestinal (EII) es una enfermedad inflamatoria crónica del tracto gastrointestinal, la colitis ulcerativa y la enfermedad de Crohn son dos tipos de EII con diferentes características, la colitis ulcerativa es una enfermedad de la mucosa que con frecuencia afecta el recto y todo o partes del colón, los síntomas que se presentan comúnmente son la diarrea, el sangrado rectal, tenesmo y dolor abdominal tipo calambre. Dependiendo la gravedad de la enfermedad de la EII, las opciones de tratamiento van empleándose de forma progresiva van desde agentes 5-aminosalicilicos, corticoides, inmunomoduladores y biológicos (1).

Los biológicos son moléculas basadas en proteínas que pueden bloquear la inflamación en varias enfermedades inmuno-mediadas, en la actualidad tres tipos de biológicos han sido aprobados para el tratamiento de la EII: los anti TNF, agentes anti integrinas y agentes anti IL 12/23.

## Evidencia

La búsqueda de la literatura realizada (ver anexo-1 en la GPC) no identificó ningún estudio que haya evaluado la intervención de interés, por lo que se pasó a revisar las Guías de Práctica Clínica que han sido publicadas para EsPap para identificar posibles

## GPC para pacientes con Espondiloartritis Periférica ASOREUMA

fuentes de información y evaluar la pertinencia de adoptar algunas de sus recomendaciones sobre esta pregunta.

Se identificó que la guía para el tratamiento de la Artritis psoriásica del Colegio Americano de Reumatología y la Fundación Nacional de Psoriasis, publicada en 2018 (2) generó recomendaciones para pacientes adultos con Artritis psoriásica (APs) activa y enfermedad inflamatoria intestinal activa. Esta GPC tiene un puntaje de evaluación AGREEII > 15 para todos sus dominios, según los 4 evaluadores que la calificaron, como parte del desarrollo de esta guía. Con lo cual se consideran sus recomendaciones válidas para ser adoptadas.

### Recomendaciones y la evidencia que la soporta.

- *En pacientes naive tanto para DMARD convencionales como para terapia biológica*

El grupo desarrollador de esta guía (GDG), recomendó de forma condicional, el inicio de terapia biológica con anticuerpos monoclonales anti TNF sobre los DMARD convencionales.

La evidencia que soporta la recomendación fue de muy baja calidad, generada de forma indirecta por medio de una revisión sistemática que incluyó 3 ensayos clínicos aleatorios (3), los estudios incluyeron pacientes con colitis ulcerativa aguda sin tratamiento previo con DMARD convencionales o terapia biológica y compararon el tratamiento con infliximab vs ciclosporina. No se encontraron diferencias significativas con respecto a la respuesta a tratamiento OR 1.08 IC 95% (0.73-1.6)  $I^2=0\%$ , las colectomías a los 3 y 12 meses no mostraron diferencias estadísticamente significativas con OR 1.00, 95% IC 0.64–1.59,  $\chi^2=0.34$ ,  $I^2=0\%$  y OR IC 95% 0.76 (0.51 a 1.14) respectivamente. No se encontraron diferencias con respecto a eventos adversos relacionados con el medicamento OR IC 95% 1.78 (0.97 a 3.27), complicaciones posoperatorias, eventos adversos serios OR IC 95% 1.41 (0.69-2.88)

*En pacientes con enfermedad activa tanto por el componente de la artritis psoriásica y la enfermedad inflamatoria intestinal a pesar del manejo con DMARD convencionales.*

El GDG generó tres recomendaciones:

1. Recomienda forma fuerte a favor, el cambio de tratamiento a un anticuerpo monoclonal inhibidor de TNF sobre el tratamiento con biológico inhibidor de IL-17.

La evidencia que soporta esta recomendación es de moderada calidad la cual muestra que los anticuerpos monoclonales biológicos inhibidores de TNF son efectivos para la EII, mientras que un biológico inhibidor IL-17 no es efectivo para la

## GPC para pacientes con Espondiloartritis Periférica ASOREUMA

EII, la evidencia que soporta esto último corresponde a un ensayo clínico aleatorio publicado en 2012 por Huber (4) en el que 59 pacientes con enfermedad de Crohn moderada a grave fueron asignados a secukinumab vs placebo, el estudio tuvo que ser descontinuado de forma temprana debido al aumento en el riesgo incluido el aumento en la tasa de infecciones y la falta de efectividad, esto resultó en una advertencia en el inserto del medicamento con respecto a los daños en esta población y no aprobación de uso en EII.

2. Dentro de los inhibidores de TNF se recomienda de forma fuerte un anticuerpo monoclonal biológico sobre un biológico receptor soluble (Etanercept).

Las búsquedas en la literatura no identificaron ningún estudio directo que abordara esta pregunta. La recomendación se basa en dos revisiones sistemáticas que compararon los inhibidores de TNF (anticuerpos monoclonales [MAB]) con placebo, uno en pacientes con enfermedad de Crohn (5), y otro en pacientes con colitis ulcerosa (6). Las revisiones sistemáticas revelaron que los MAB anti TNF dan como resultado una probabilidad 1.66 veces mayor de inducción de remisión (IC 95%: 1.17-2.36) y una probabilidad 1.43 veces mayor de inducción de respuesta (IC 95%: 1.17-1.73) en comparación a placebo en pacientes con enfermedad de Crohn. Para los pacientes con colitis ulcerosa, los metaanálisis encontraron una probabilidad 2.45 veces mayor de inducción de remisión y una probabilidad 1.65 veces mayor de inducción de respuesta en comparación con placebo (RR: 2.45, IC 95%: 1.72-3.47 y RR: 1.65, IC 95%: 1.37- 1.99 respectivamente).

3. En pacientes con APs activa y EII activa a pesar del tratamiento con DMARD convencionales se recomienda, de forma condicional, el inicio de un anticuerpo monoclonal inhibidor de TNF sobre el tratamiento con biológico inhibidor de IL-12-23

La evidencia que soporta esta recomendación es de muy baja calidad y se consideró basado en consenso de los expertos del panel, que el cambio a un biológico inhibidor de IL-12-23 se puede considerar en pacientes con contraindicación para el inhibidor de TNF por falla cardíaca congestiva, infección previa grave, infecciones recurrentes, enfermedad desmielinizante o preferencia del paciente por la administración de un medicamento menos frecuente.

### Valores y preferencia de pacientes

Bolge y cols en 2017 (7) publicaron un estudio con el objetivo de describir la experiencia del tratamiento con biológicos endovenosos en pacientes con espondilitis anquilosante, enfermedad de Crohn, artritis psoriásica o colitis ulcerativa. Se realizaron entrevistas semi-estructuradas de forma telefónica en 405 pacientes con enfermedades autoinmunes quienes recibieron manejo con biológicos endovenosos para tratar su enfermedad. En una escala de 7 puntos (1=no satisfecho; 7=muy

## GPC para pacientes con Espondiloartritis Periférica ASOREUMA

satisfecho), el promedio de satisfacción con la medicación endovenosa (EV) fue de 6.1, el 77% de los pacientes calificó la satisfacción como 6 o 7. El beneficio más frecuentemente percibido de la terapia EV estuvo relacionada con la supervisión que brinda el personal de salud. La mayoría de los pacientes (82% n=332) prefirió la terapia EV sobre la subcutánea, dentro de las razones de la preferencia está el no tener que auto inyectarse, menos frecuencia de dosis y la preferencia de aplicación por parte del personal de salud.

### Costos

Yi-Sheng y cols en 2019 (1) publicaron un estudio cuyo objetivo fue evaluar la costo efectividad de la terapia biológica con o sin tratamiento inmunomodulador comparado con inmunomoduladores para la colitis ulcerativa. La revisión incluyó un ensayo clínico de buena calidad y otro de pobre calidad en los cuales se comparó el infliximab endovenoso con ciclosporina oral, azatioprina y la combinación de azatioprina y infliximab en pacientes con colitis ulcerativa moderada a grave sin respuesta a los corticoides. El estudio de muy buena calidad fue la evaluación de tecnología de la NSH (8) la cual mostró que el menor costo de la ciclosporina condujo a menores costos totales (MD - £ 5632, IC del 95% - £ 8305 a - £ 2773;  $p < 0,001$ ).

## Pregunta 8: Marco de trabajo –De la evidencia a las decisiones

| <b>PREGUNTA</b>               |                                                                                                         |
|-------------------------------|---------------------------------------------------------------------------------------------------------|
| <b>POBLACION</b>              | <i>Adultos con Espondiloartritis Periférica y enfermedad inflamatoria intestinal asociada</i>           |
| <b>INTERVENCIÓN</b>           | <i>DMARD biológicos (Anti TNF, anti IL-17, Anti IL-23, inhibidores JAK)</i>                             |
| <b>COMPARACIÓN</b>            | <i>DMARDs sintéticos o convencionales</i>                                                               |
| <b>DESENLACES PRINCIPALES</b> | <i>Remisión clínica, remisión endoscópica, tasa de recaídas, eventos adversos, falla al tratamiento</i> |
| <b>ÁMBITO</b>                 | <i>Ambulatorio</i>                                                                                      |
| <b>PERSPECTIVA</b>            | <i>Del grupo desarrollador de la Guía</i>                                                               |
| <b>CONFLICTO DE INTERÉS:</b>  | <i>No se hace manifiesto ningún conflicto de interés</i>                                                |

## Evaluación

| <b>Problema</b><br>Es el problema una prioridad? |                                      |                                    |
|--------------------------------------------------|--------------------------------------|------------------------------------|
| <b>JUICIO</b>                                    | <b>EVIDENCIA DE LA INVESTIGACION</b> | <b>CONSIDERACIONES ADICIONALES</b> |
|                                                  |                                      |                                    |

|                                                                                                                                                                             |                                                                                                                                                                                                                                                                                                                                                                                                                                                                                    |  |
|-----------------------------------------------------------------------------------------------------------------------------------------------------------------------------|------------------------------------------------------------------------------------------------------------------------------------------------------------------------------------------------------------------------------------------------------------------------------------------------------------------------------------------------------------------------------------------------------------------------------------------------------------------------------------|--|
| <ul style="list-style-type: none"> <li>○ No</li> <li>○ Probablemente No</li> <li>○ Probablemente Si</li> <li>○ Si</li> <li>○ Es variable</li> <li>○ No se conoce</li> </ul> | La asociación entre la enfermedad inflamatoria intestinal y las enfermedades reumatológicas es frecuente, dicha asociación genera mayores retos en el tratamiento de los pacientes y peores desenlaces clínicos. (9) A la fecha no hay guías integradas disponibles para orientar y optimizar el tratamiento farmacológico de estos pacientes (10) pero cada vez existe más conciencia en la clínica de la importancia del manejo conjunto entre reumatólogos y gastroenterólogos. |  |
|-----------------------------------------------------------------------------------------------------------------------------------------------------------------------------|------------------------------------------------------------------------------------------------------------------------------------------------------------------------------------------------------------------------------------------------------------------------------------------------------------------------------------------------------------------------------------------------------------------------------------------------------------------------------------|--|

### Efectos deseables (beneficios de la opción a recomendar)

¿Qué tan sustanciales son los efectos deseables de la opción?

| JUICIO                                                                                                                                                | EVIDENCIA DE LA INVESTIGACION |                                |                                 |                            | CONSIDERACIONES ADICIONALES |  |
|-------------------------------------------------------------------------------------------------------------------------------------------------------|-------------------------------|--------------------------------|---------------------------------|----------------------------|-----------------------------|--|
| <div><div></div><div>○ Triviales</div><div>○ Pequeños</div><div>○ Moderados</div><div>○ Grandes</div><div>○ Varían</div><div>○ No se sabe</div></div> |                               |                                |                                 |                            |                             |  |
|                                                                                                                                                       | Desenlaces                    | Nº de participantes (estudios) | Certeza de la evidencia (GRADE) | Efecto relativo (95% CI)   |                             |  |
|                                                                                                                                                       | Inducción de remisión         | 6 ECAs (1771)                  | Moderada                        | OR 1.66 IC 95% (0.17-2.36) |                             |  |
|                                                                                                                                                       | Inducción de respuesta        | 6 ECAs (1771)                  | Moderada                        | OR 1.43 IC 95% (0.17-1.73) |                             |  |

| Efectos Indeseables                                                                                                                                        |                                                                                                                                                                                                                                                                                                                             |                                 |                                |                             |                                            |                                 |                          |                         |              |          |                                |  |
|------------------------------------------------------------------------------------------------------------------------------------------------------------|-----------------------------------------------------------------------------------------------------------------------------------------------------------------------------------------------------------------------------------------------------------------------------------------------------------------------------|---------------------------------|--------------------------------|-----------------------------|--------------------------------------------|---------------------------------|--------------------------|-------------------------|--------------|----------|--------------------------------|--|
| ¿Qué tan sustanciales son los efectos indeseables que se pueden anticipar?                                                                                 |                                                                                                                                                                                                                                                                                                                             |                                 |                                |                             |                                            |                                 |                          |                         |              |          |                                |  |
| JUICIO                                                                                                                                                     | EVIDENCIA DE LA INVESTIGACION                                                                                                                                                                                                                                                                                               |                                 |                                | CONSIDERACIONES ADICIONALES |                                            |                                 |                          |                         |              |          |                                |  |
| <ul style="list-style-type: none"><li>○ Triviales</li><li>○ Pequeños</li><li>○ Moderados</li><li>○ Grandes</li><li>○ Varían</li><li>○ No se sabe</li></ul> | <table><thead><tr><th>Desenlaces</th><th>Nº de participantes (estudios) Seguimiento</th><th>Certeza de la evidencia (GRADE)</th><th>Efecto relativo (95% CI)</th></tr></thead><tbody><tr><td>Eventos adversos serios</td><td>3 ECAs (415)</td><td>Muy Baja</td><td>Risk ratio 1.41 (0.73 to 2.71)</td></tr></tbody></table> |                                 |                                | Desenlaces                  | Nº de participantes (estudios) Seguimiento | Certeza de la evidencia (GRADE) | Efecto relativo (95% CI) | Eventos adversos serios | 3 ECAs (415) | Muy Baja | Risk ratio 1.41 (0.73 to 2.71) |  |
| Desenlaces                                                                                                                                                 | Nº de participantes (estudios) Seguimiento                                                                                                                                                                                                                                                                                  | Certeza de la evidencia (GRADE) | Efecto relativo (95% CI)       |                             |                                            |                                 |                          |                         |              |          |                                |  |
| Eventos adversos serios                                                                                                                                    | 3 ECAs (415)                                                                                                                                                                                                                                                                                                                | Muy Baja                        | Risk ratio 1.41 (0.73 to 2.71) |                             |                                            |                                 |                          |                         |              |          |                                |  |
| Certeza en la Evidencia                                                                                                                                    |                                                                                                                                                                                                                                                                                                                             |                                 |                                |                             |                                            |                                 |                          |                         |              |          |                                |  |
| ¿Cuál es la certeza en la evidencia global sobre los efectos de la opción a recomendar?                                                                    |                                                                                                                                                                                                                                                                                                                             |                                 |                                |                             |                                            |                                 |                          |                         |              |          |                                |  |
| JUICIO                                                                                                                                                     | EVIDENCIA DE LA INVESTIGACION                                                                                                                                                                                                                                                                                               |                                 |                                | CONSIDERACIONES ADICIONALES |                                            |                                 |                          |                         |              |          |                                |  |

|                                                                                                                                                                                                                                                                                  |                                                                                                                                                                                                                                                                                                                                                                                                                                                                                                                                                                          |                             |                                        |                                    |
|----------------------------------------------------------------------------------------------------------------------------------------------------------------------------------------------------------------------------------------------------------------------------------|--------------------------------------------------------------------------------------------------------------------------------------------------------------------------------------------------------------------------------------------------------------------------------------------------------------------------------------------------------------------------------------------------------------------------------------------------------------------------------------------------------------------------------------------------------------------------|-----------------------------|----------------------------------------|------------------------------------|
| <ul style="list-style-type: none"> <li>○ Muy baja</li> <li>○ Baja</li> <li>○ Moderada</li> <li>○ Alta</li> <li>○ No se identificaron estudios</li> </ul>                                                                                                                         |                                                                                                                                                                                                                                                                                                                                                                                                                                                                                                                                                                          |                             |                                        |                                    |
|                                                                                                                                                                                                                                                                                  | <b>Desenlace</b>                                                                                                                                                                                                                                                                                                                                                                                                                                                                                                                                                         | <b>Importancia Relativa</b> | <b>Certeza de la evidencia (GRADE)</b> |                                    |
|                                                                                                                                                                                                                                                                                  | Respuesta al tratamiento                                                                                                                                                                                                                                                                                                                                                                                                                                                                                                                                                 | CRITICAL                    | ⊕⊕⊕○<br>MODERADA                       |                                    |
|                                                                                                                                                                                                                                                                                  | Eventos adversos serios                                                                                                                                                                                                                                                                                                                                                                                                                                                                                                                                                  | CRITICAL                    | ⊕○○○<br>MUY BAJA                       |                                    |
| <b>Valores de los pacientes</b><br>¿Hay variación o poca certeza sobre cómo valoran las personas/los pacientes los desenlaces principales?                                                                                                                                       |                                                                                                                                                                                                                                                                                                                                                                                                                                                                                                                                                                          |                             |                                        |                                    |
| <b>JUICIO</b>                                                                                                                                                                                                                                                                    | <b>EVIDENCIA DE LA INVESTIGACION</b>                                                                                                                                                                                                                                                                                                                                                                                                                                                                                                                                     |                             |                                        | <b>CONSIDERACIONES ADICIONALES</b> |
| <ul style="list-style-type: none"> <li>○ Variabilidad o incertidumbre importante</li> <li>○ Posiblemente hay variabilidad o incertidumbre importante</li> <li>○ Posiblemente</li> <li>No hay variabilidad o incertidumbre importante</li> <li>○ No hay variabilidad o</li> </ul> | Un estudio (7) mostró que el promedio de satisfacción con la medicación endovenosa (EV) biológica fue de 6.1, el 77% de los pacientes calificó la satisfacción como 6 o 7. El beneficio más frecuentemente percibido de la terapia EV estuvo relacionada con la supervisión que brinda el personal de salud. La mayoría de los pacientes (82% n=332) prefirió la terapia EV sobre la subcutánea, dentro de las razones de la preferencia está el no tener que auto inyectarse, menos frecuencia de dosis y la preferencia de aplicación por parte del personal de salud. |                             |                                        |                                    |

|                                                                                                                                                                                                                                                                                                                       |                                                                                  |                                    |
|-----------------------------------------------------------------------------------------------------------------------------------------------------------------------------------------------------------------------------------------------------------------------------------------------------------------------|----------------------------------------------------------------------------------|------------------------------------|
| incertidumbre importante                                                                                                                                                                                                                                                                                              |                                                                                  |                                    |
| <b>Balance de los efectos</b><br>¿El balance entre los efectos deseables e indeseables favorece la opción o el comparador?                                                                                                                                                                                            |                                                                                  |                                    |
| <b>JUICIO</b>                                                                                                                                                                                                                                                                                                         | <b>EVIDENCIA DE LA INVESTIGACION</b>                                             | <b>CONSIDERACIONES ADICIONALES</b> |
| <ul style="list-style-type: none"> <li>○ Favorece al comparador</li> <li>○ Probablemente favorece al comparador</li> <li>○ No favorece al comparador ni a la opción en evaluación</li> <li>○ Probablemente favorece a la opción</li> <li>○ Favorece la intervención</li> <li>○ Varia</li> <li>○ No se sabe</li> </ul> | Es probable que los efectos beneficios superen el riesgo de eventos indeseables. |                                    |
| <b>Recursos Requeridos</b>                                                                                                                                                                                                                                                                                            |                                                                                  |                                    |

| JUICIO                                                                                                                                                                                                                                       | EVIDENCIA DE LA INVESTIGACION                                                                                                                                                                                                      | CONSIDERACIONES ADICIONALES |
|----------------------------------------------------------------------------------------------------------------------------------------------------------------------------------------------------------------------------------------------|------------------------------------------------------------------------------------------------------------------------------------------------------------------------------------------------------------------------------------|-----------------------------|
| <ul style="list-style-type: none"> <li>○ Grandes costos</li> <li>○ Costos moderados</li> <li>○ no significantes costos ni ahorros</li> <li>○ Moderados ahorros</li> <li>○ Grandes ahorros</li> <li>○ Varían</li> <li>○ No se sabe</li> </ul> | Una evaluación de tecnología de la NSH (8) mostró que el uso de la ciclosporina condujo a menores costos totales (MD - £ 5632, IC del 95% - £ 8305 a - £ 2773; p <0,001) de tratamiento en un horizonte de tiempo de toda la vida. |                             |

### Equidad

¿La implementación de la opción, tendrá impacto en la equidad?

| JUICIO                                                                                                                                                  | EVIDENCIA DE LA INVESTIGACION                                                                   | CONSIDERACIONES ADICIONALES                                                                                                                                 |
|---------------------------------------------------------------------------------------------------------------------------------------------------------|-------------------------------------------------------------------------------------------------|-------------------------------------------------------------------------------------------------------------------------------------------------------------|
| <ul style="list-style-type: none"> <li>○ Reduce</li> <li>○ Probablemente se reduce la equidad</li> <li>○ Probablemente no impacta la equidad</li> </ul> | Los estudios evaluados no evalúan el impacto de las intervenciones en las inequidades en salud. | El alto costo de los DMARDs biológicos y su falta de disponibilidad en varios de los territorios del país puede aumentar de forma importante las brechas de |

|                                                                                                                                                                     |                                                                                             |                                                                                                                                                                                                                                                                                                                                                              |
|---------------------------------------------------------------------------------------------------------------------------------------------------------------------|---------------------------------------------------------------------------------------------|--------------------------------------------------------------------------------------------------------------------------------------------------------------------------------------------------------------------------------------------------------------------------------------------------------------------------------------------------------------|
| <ul style="list-style-type: none"> <li>○ Probablemente incrementa</li> <li>○ Incrementa</li> <li>○ Varía</li> <li>○ No se sabe</li> </ul>                           |                                                                                             | inequidad en salud.                                                                                                                                                                                                                                                                                                                                          |
| <b>Aceptabilidad</b><br>¿Es la opción aceptada por los diferentes actores involucrados en su implementación?                                                        |                                                                                             |                                                                                                                                                                                                                                                                                                                                                              |
| <b>JUICIO</b>                                                                                                                                                       | <b>EVIDENCIA DE LA INVESTIGACION</b>                                                        | <b>CONSIDERACIONES ADICIONALES</b>                                                                                                                                                                                                                                                                                                                           |
| <ul style="list-style-type: none"> <li>○ No</li> <li>○ Probablemente no</li> <li>○ Probablemente sí</li> <li>○ Si</li> <li>○ Varía</li> <li>○ No se sabe</li> </ul> | No hay estudios que documenten la aceptación o no de estas terapias entre los involucrados. | La guía del colegio americano de reumatología y la Fundación nacional de psoriasis publicada en 2018 recomienda el inicio de forma preferencial del tratamiento con terapia biológica anti TNF en pacientes naïve para el manejo. Es muy probable que una recomendación en el mismo sentido sea aceptada por los implicados en el cuidado de estos pacientes |
| <b>Factibilidad</b><br>¿Es la opción factible de IMPLEMENTAR?                                                                                                       |                                                                                             |                                                                                                                                                                                                                                                                                                                                                              |

| JUICIO                                                                                                                                                                                           | EVIDENCIA DE LA INVESTIGACION               | CONSIDERACIONES ADICIONALES                                                                                                                                                                                       |
|--------------------------------------------------------------------------------------------------------------------------------------------------------------------------------------------------|---------------------------------------------|-------------------------------------------------------------------------------------------------------------------------------------------------------------------------------------------------------------------|
| No<br><input type="radio"/> Probablemente no<br><input type="radio"/> Probablemente si<br><input type="radio"/> Si<br><input type="radio"/> Varia<br><input checked="" type="radio"/> No se sabe | No se encontraron estudios de factibilidad. | Los DAMRDs biológicos se comercializan en Colombia bajo licencia y registro del Invima. Por lo que no se anticipa dificultades en su implementación mas allá de las relacionadas con su accesibilidad por costos. |

### Resumen de Juicios

|                         | JUICIOS    |                  |                  |               |  |       |                     |
|-------------------------|------------|------------------|------------------|---------------|--|-------|---------------------|
| PROBLEMA                | No         | Probablemente no | Probablemente si | Si            |  | Varia | No se sabe          |
| EFFECTOS DESEABLES      | Triviales  | Pequeños         | Moderados        | Grandes       |  | Varia | No se sabe          |
| EFFECTOS INDESEABLES    | Grandes    | Moderados        | Pequeños         | Triviales     |  | Varia | No se sabe          |
| CERTEZA EN LA EVIDENCIA | Muy Baja   | Baja             | Moderada         | Alta          |  |       | No incluyó estudios |
| VALORES DE              | Importante | Posiblemente     | Probablemente    | No Importante |  |       |                     |

|                        | JUICIOS                      |                                         |                                                 |                                        |                          |       |            |
|------------------------|------------------------------|-----------------------------------------|-------------------------------------------------|----------------------------------------|--------------------------|-------|------------|
| PACIENTES              | incertidumbre o variabilidad | Importante incertidumbre o variabilidad | No Importante incertidumbre o variabilidad      | incertidumbre o variabilidad           |                          |       |            |
| BALANCE DE LOS EFECTOS | Favorece el comparador       | Probablemente Favorece el comparador    | No favorece Ni la intervención ni el comparador | Probablemente favorece la intervención | Favorece la intervención | Varia | No se sabe |
| RECURSOS REQUERIDOS    | Grandes costos               | Moderados costos                        | Costos y ahorros insignificantes                | Moderados ahorros                      | Grandes ahorros          | Varia | No se sabe |
| EQUIDAD                | Reducida                     | Probablemente reducida                  | Probablemente no impactada                      | Probablemente incrementada             | Incrementada             | Varia | No se sabe |
| ACEPTABILIDAD          | No                           | Probablemente No                        | Probablemente Si                                | Si                                     |                          | Varia | No se sabe |
| FACTIBILIDAD           | No                           | Probablemente No                        | Probablemente Si                                | Si                                     |                          | Varia | No se sabe |

### Tipo de Recomendación

|                                                  |                                                       |                                                                                |                                                     |                                                |
|--------------------------------------------------|-------------------------------------------------------|--------------------------------------------------------------------------------|-----------------------------------------------------|------------------------------------------------|
| Recomendación fuerte en contra de la opción<br>○ | Recomendación condicional en contra de la opción<br>○ | Recomendación condicional a favor de cualquiera la opción o su comparador<br>○ | Recomendación condicional a favor de la opción<br>○ | Recomendación fuerte a favor de la opción<br>○ |
|--------------------------------------------------|-------------------------------------------------------|--------------------------------------------------------------------------------|-----------------------------------------------------|------------------------------------------------|

## Conclusiones

### Recomendación

En adultos con Espondiloartritis Periférica y enfermedad inflamatoria intestinal asociada, que no responden al manejo con DMARDs convencionales, se recomienda el uso de un anticuerpo monoclonal inhibidor de TNF, sobre el tratamiento con un biológico inhibidor de IL-17 (certeza de la evidencia moderada) y sobre el tratamiento con un biológico inhibidor de IL-12-23 (certeza de la evidencia muy baja).

Recomendación condicional a favor de la intervención.

Certeza de la evidencia:

Anti TNF Sobre IL-17: Moderada.

Anti TNF Sobre IL-12-23 Muy baja

### Justificación

Consideraciones:

1. La evidencia que soporta la actual recomendación corresponde a evidencia indirecta y consenso de expertos.
2. Las actuales recomendaciones se fundamentan en evidencia indirecta a cerca de la efectividad y seguridad de la terapia biológica en pacientes con EII, sin contar con estudios que incluyan la población de interés (artritis psoriásica y EII).

El panel por consenso considera que a pesar de la falta de estudios en la población de interés (EspAp y enfermedad inflamatoria intestinal asociada), la evidencia indirecta soporta de la efectividad y seguridad de la terapia biológica en pacientes con espondilo artropatías. Esta recomendación va en consonancia con las recomendaciones de otras guías de práctica clínica en el manejo de la enfermedad.

### Consideraciones por subgrupos

El panel no identifico necesidad de considerara excepciones por subgrupos de riesgo.

### Consideraciones de implementación

PUNTO DE BUENA PRACTICA: Dentro del grupo de inhibidores de TNF $\alpha$  , se debe preferir el uso de anticuerpos monoclonales sobre los biológicos de receptor soluble .

Certeza de la evidencia Moderada

### Monitoreo y evaluación de cumplimiento

Se definirán como parte del proceso de implementación.

### Prioridades de investigación futura

Es necesario realizar estudios comparativos con adecuado control de sesgos que evalúen comparativamente los efectos de los tratamientos con DMARDs biológicos sobre el control de la enfermedad cuando cursa con compromiso intestinal.

## Referencias:

1. Chao Y-S, Loshak H. Biologics versus Immunomodulators for the Treatment of Ulcerative Colitis: A Review of Comparative Clinical Effectiveness and Cost-Effectiveness [Internet]. Ottawa (ON): Canadian Agency for Drugs and Technologies in Health; 2019 [citado 4 de agosto de 2020]. (CADTH Rapid Response Reports). Disponible en: <http://www.ncbi.nlm.nih.gov/books/NBK549363/>
2. al JAS et. 2018 American College of Rheumatology/National Psoriasis Foundation Guideline for the Treatment of Psoriatic Arthritis | Kopernio [Internet]. [citado 23 de julio de 2020]. Disponible en: <https://kopernio.com/viewer?doi=10.1002%2Facr.23789&token=WzExMzQ3NTYsIjEwLjEwMDIvYWNYLjIzNzg5Il0.HRKTIZjSJrmIeOUCnv7GG4F0FCY>
3. Narula N, Marshall JK, Colombel J-F, Leontiadis GI, Williams JG, Muqtadir Z, et al. Systematic Review and Meta-Analysis: Infliximab or Cyclosporine as Rescue Therapy in Patients With Severe Ulcerative Colitis Refractory to Steroids. *Am J Gastroenterol*. 2016;111(4):477-91.
4. Hueber W, Sands BE, Lewitzky S, Vandemeulebroecke M, Reinisch W, Higgins PDR, et al. Secukinumab, a human anti-IL-17A monoclonal antibody, for moderate to severe Crohn's disease: unexpected results of a randomised, double-blind placebo-controlled trial. *Gut*. diciembre de 2012;61(12):1693-700.
5. Systematic review with network meta-analysis: the efficacy of anti-TNF agents for the treatment of Crohn's disease - Stidham - 2014 - *Alimentary Pharmacology & Therapeutics* - Wiley Online Library [Internet]. [citado 5 de agosto de 2020]. Disponible en: <https://onlinelibrary.wiley.com/doi/full/10.1111/apt.12749>
6. Stidham RW, Lee TCH, Higgins PDR, Deshpande AR, Sussman DA, Singal AG, et al. Systematic review with network meta-analysis: the efficacy of anti-tumour necrosis factor-alpha agents for the treatment of ulcerative colitis. *Aliment Pharmacol Ther*. abril de 2014;39(7):660-71.
7. Bolge SC, Eldridge HM, Lofland JH, Ravin C, Hart PJ, Ingham MP. Patient experience with intravenous biologic therapies for ankylosing spondylitis, Crohn's disease, psoriatic arthritis, psoriasis, rheumatoid arthritis, and ulcerative colitis. *Patient Prefer Adherence*. 2017;11:661-9.
8. Williams JG, Alam MF, Alrubaiy L, Clement C, Cohen D, Grey M, et al. Comparison Of infliximab and ciclosporin in STeroid Resistant Ulcerative Colitis: pragmatic randomised Trial and economic evaluation (CONSTRUCT). *Health Technol Assess Winch Engl*. 2016;20(44):1-320.

9. Felice C, Pugliese D, Papparella LG, Pizzolante F, Onori E, Gasbarrini A, et al. Clinical management of rheumatologic conditions co-occurring with inflammatory bowel diseases. *Expert Rev Clin Immunol*. 2018;14(9):751-9.
10. Armuzzi A, Felice C, Lubrano E, Cantini F, Castiglione F, Gionchetti P, et al. Multidisciplinary management of patients with coexisting inflammatory bowel disease and spondyloarthritis: A Delphi consensus among Italian experts. *Dig Liver Dis Off J Ital Soc Gastroenterol Ital Assoc Study Liver*. diciembre de 2017;49(12):1298-305.

## GPC para pacientes con Espondiloartritis Periférica ASOREUMA

Pregunta 9: Para evaluar la actividad de la enfermedad en pacientes adultos con Espondiloartritis Periférica, es útil (*características operativas de la prueba*\*) el uso de las escalas de clinimetría: "Disease Activity Score-28 (DAS 28)" vs "Disease Activity for Psoriatic Arthritis (DAPSA)" vs "Minimal disease activity (MDA)"?

|                     |                                                                                                                                 |
|---------------------|---------------------------------------------------------------------------------------------------------------------------------|
| <b>Población</b>    | Pacientes adultos con espondiloartritis periférica                                                                              |
| <b>Intervención</b> | "Disease Activity Score-28 (DAS 28)" vs "Disease Activity for Psoriatic Arthritis ( DAPSA)" vs "Minimal disease activity (MDA)" |
| <b>Comparación</b>  | "Disease Activity Score-28 (DAS 28)" vs "Disease Activity for Psoriatic Arthritis ( DAPSA)" vs "Minimal disease activity (MDA)" |
| <b>Desenlaces</b>   | Características operativas de la prueba<br>Capacidad de discriminación y sensibilidad al cambio                                 |

### Antecedentes

La artritis psoriásica (APs) es una enfermedad heterogénea caracterizada por el compromiso de varios dominios: piel, uñas, articulaciones axiales, periféricas y entesitis. (1) La evaluación de estos dominios se realiza por medio de cuestionarios o mediciones validadas a fin de objetivar la actividad de la enfermedad (2), dicha evaluación permitirá determinar cual es el objetivo de tratamiento (optimizar la función, mejorar la calidad de vida, prevenir el daño estructural), la respuesta temprana al manejo instaurado y de esta manera reducir el riesgo de recibir terapias ineficaces y con posibles eventos adversos (3).

En la actualidad se cuenta con índices que evalúan las manifestaciones de la enfermedad de forma individual (enfoque unidimensional) o mediante la combinación de medidas que generan una puntuación general (enfoque multidimensional). Ver (anexo 1) componentes en el cálculo de actividad de la enfermedad.

Los pacientes con PSA pueden cursar con artritis periférica, la cual en ensayos clínicos de tratamiento ha sido evaluada con mediciones de desenlaces diseñados y validados para artritis reumatoide dentro de los que se encuentra el DAS 28, el cual evalúa 28 articulaciones las cuales pueden no ser las comprometidas en la APs, entidad en la que se ha descrito mayor tendencia a la asimetría y un mayor número de articulaciones comprometidas.

Teniendo en cuenta lo anterior, se desarrolló y validó un índice compuesto para APs, denominado el DAPSA, este consiste en la suma numérica simple de TJC (tender joint

## GPC para pacientes con Espondiloartritis Periférica ASOREUMA

count), SJC (recuento de articulaciones inflamadas), evaluaciones globales del paciente y del dolor del paciente (cada una en cm) y PCR (en mg / dl). El DAPSA da un puntaje continuo de la actividad de la artritis y ha sido validado los puntos de corte de <4 para remisión y <14 para baja actividad de la enfermedad. (4)

El MDA (minimal disease activity) es un índice multidimensional que evalúa las articulaciones, la presencia de entesitis, la piel y la función física, reunidos en 7 ítems y para indicar que el paciente tiene la mínima actividad de la enfermedad debe cumplir 5 de 7 criterios. La remisión se evalúa por el conteo de articulaciones dolorosas (68 articulaciones), articulaciones inflamadas (66 articulaciones), evaluación global del paciente, evaluación del dolor y el cuestionario de evaluación de salud (HAQ), psoriasis y entesitis.

Estos criterios permiten evaluar varios dominios de la enfermedad de forma simultánea y su uso ha sido recomendado como objetivo de tratamiento en APs por la estrategia denominada “treat to target”(5) y el GRAPPA-OMETACT(6).

En la actualidad se dispone de múltiples índices y no existe consenso sobre cuál debe ser empleado, dado que en muchas ocasiones no existe conexión entre el compromiso de los diferentes dominios, pero es de gran relevancia definir la mejor herramienta a fin de indicar las mejores terapias biológicas que abarquen y controlen el mayor espectro de la enfermedad.

### Efectividad

La búsqueda de la evidencia no identificó revisiones sistemáticas de pruebas diagnósticas que compararan las características operativas de las escalas de actividad de la enfermedad, se identificaron cuatro estudios que se describen a continuación. Salaffi y cols (7) compararon el desempeño de varios índices de actividad en una cohorte de pacientes con APs. Se incluyeron 171 pacientes de acuerdo con los criterios de CASPAR (classification criteria for psoriatic arthritis). Se ha estimado una prevalencia de APs entre la población con psoriasis entre 6.2 y 34%, en Italia se ha sido estimado que un 36% de los sujetos que cursan con psoriasis tienen APs y esta representa un 0.42% de la población general (8)(9) . El promedio de edad fue de 51.55 (SD 11.61), la cohorte incluyó un 56% de sujetos con enfermedad mono articular y 43.9% poliarticular. Se evaluó las características operativas del el DAS-28 y el DAPSA comparado con el MDA (estándar de referencia) definido como un paciente que alcanzara 5 de los siguientes 7 criterios: 68 articulaciones dolorosas  $\leq 1$ ; 66 articulaciones inflamadas  $\leq 1$ ; Índice de gravedad y área de psoriasis (PASI)  $\leq 1$ ; evaluación de dolor NRS  $\leq 1.5$ ; evaluación global de la actividad de la enfermedad por paciente (PtGA of disease activity)  $\leq 2$ ; HAQ  $\leq 0.5$ ; puntos sensibles de entesitis  $\leq 1$  y el criterio de remisión fue definido como ausencia de articulaciones dolorosas o inflamadas, VSG menor de 20mm y PCR  $< 0.5\text{mg/dL}$ .

## GPC para pacientes con Espondiloartritis Periférica ASOREUMA

La mediana del DAS-28 fue de 3.59 IC 95% (2.37 a 4.0), la mediana del DAPSA fue de 22.05 (11.51 a 26.73). Se realizó la estimación del área bajo la curva (AUC) para:

| Índices de actividad                  | AUC   | SE <sup>a</sup> | 95% CI         |
|---------------------------------------|-------|-----------------|----------------|
| <b>Minimal Disease Activity (MDA)</b> |       |                 |                |
| DAS28-CRP                             | 0.886 | 0.0251          | 0.828 to 0.929 |
| DAPSA                                 | 0.896 | 0.0247          | 0.840 to 0.937 |
| <b>Remisión</b>                       |       |                 |                |
| DAS28-CRP                             | 0.894 | 0.0255          | 0.838 to 0.936 |
| DAPSA                                 | 0.899 | 0.0240          | 0.843 to 0.939 |

<sup>a</sup> Hanley & McNeil, 1982; <sup>b</sup> Binomial exact

No se encontraron diferencias estadísticamente significativas entre las AUC de los índices. A continuación, se relacionan los valores de sensibilidad y especificidad. Se encontró un alto grado de correlación entre los índices, el coeficiente de correlación entre el DAS-28 y el DAPSA fue de 0.957 (p<0.0001)

| Índices                               | Punto de corte | S     | IC 95%    | E     | IC 95%    | LR + | IC 95%   | LR - | IC 95%  |
|---------------------------------------|----------------|-------|-----------|-------|-----------|------|----------|------|---------|
| <b>Minimal Disease Activity (MDA)</b> |                |       |           |       |           |      |          |      |         |
| DAS28                                 | ≤3.6           | 76.09 | 66.1–84.4 | 88.75 | 79.7–94.7 | 6.76 | 3.6–12.6 | 0.27 | 0.2–0.4 |
| DAPSA                                 | ≤15            | 77.17 | 67.2–85.3 | 88.75 | 79.7–94.7 | 6.86 | 3.7–12.8 | 0.26 | 0.2–0.4 |
| <b>Remisión</b>                       |                |       |           |       |           |      |          |      |         |
| DAS28                                 | <2.4           | 72.00 | 63.3–79.7 | 89.36 | 76.9–96.5 | 6.77 | 2.9–15.6 | 0.31 | 0.2–0.4 |
| DAPSA                                 | <4             | 72.80 | 64.1–80.4 | 89.36 | 76.9–96.5 | 6.84 | 3.0–15.8 | 0.30 | 0.2–0.4 |

Van Men y cols publicaron en 2018 (10) un estudio de cohorte trasversal desarrollado en el Reino Unido cuyo objetivo fue comparar los índices propuestos para definir remisión o baja actividad de la enfermedad, se emplearon un conjunto de datos de vida real de pacientes con APs con enfermedad inactiva según su reumatólogo. Los datos fueron tomados de una base de datos de 250 pacientes los cuales debían haber recibido tratamiento estable en los últimos 6 meses, el promedio de edad fue de 55 años y 75% fueron hombres, el promedio de duración de la enfermedad fue 12.7 (9.2) años. Cuatro definiciones de enfermedad inactiva o en remisión fueron utilizadas:

Muy baja actividad de la enfermedad, donde se debían cumplir los 7 criterios del MDA

## GPC para pacientes con Espondiloartritis Periférica ASOREUMA

Remisión por DAPSA: puntaje de TJC + SJC + VAS global+ VAS dolor + PCR  $\leq$  4

DAPSA clínico: TJC + SJC + VAS global+ VAS dolor  $\leq$  4

Fueron calculadas las proporciones para cada criterio. El acuerdo entre las definiciones probadas se estableció utilizando el cálculo de kappa. La proporción de enfermedad residual se estableció para dominios clínicos clave de APs (artritis periférica, entesitis, psoriasis, dactilitis) y se evaluaron los niveles de inflamación sistémica, medidos por PCR.

De los 250 pacientes 107 (43,7%) cumplieron los criterios de remisión por DAPSA, 113 (45.7%) cumplieron criterios por DAPSA clínico, 54 (22.5) cumplieron los criterios de MDA modificados (VLDA), se encontró un alto acuerdo entre el DAPSA y el DAPSA clínico con un Kappa de 0.959 y el acuerdo entre el DAPSA y el MDA modificado fue moderado con kappa de 0.516. Se considero que los criterios MDA eran más estrictos y difíciles de alcanzar.

Wervers y cols (11) publicaron en 2018 un estudio conducido en los países bajos cuyo objetivo fue comparar la carga de la enfermedad en pacientes con baja actividad evaluada de acuerdo a dos definiciones, DAPSA y MDA posterior a 1 año del diagnóstico. Se incluyeron paciente con diagnóstico de novó de APs quienes no vinieran recibiendo manejo con tratamientos modificadores de la enfermedad (DMARDs). Se incluyeron 292 pacientes, el promedio de edad fue 51 (SD 14) años, el 51% fueron hombres y la mediana de duración de inicio de los síntomas fue de 12 (IQR 4-32) meses. A la visita 12 de seguimiento el 48% habían alcanzado el MDA y 64% el DAPSA. El promedio de puntuación de funciones corporales y actividad fueron mejores en los pacientes que alcanzaron el MDA que en aquellos que alcanzaron el DAPSA, considerando que el promedio de carga de la enfermedad fue mejor en los que alcanzaban el MDA que el DAPSA.

Helliwell y cols en 2013 (12) publicaron un estudio conducido en Estados Unidos cuyo objetivo fue evaluar el desempeño de diferentes índices dentro de los que se encuentra el DAPSA, empleando el DAS 28 como patrón de referencia. La evaluación de los índices se hizo en semana 14 y 24, los datos se obtuvieron dentro del marco de evaluación de efectividad el golimumab 50mg – 100mg vs placebo en pacientes con APs, al ingreso 90 pacientes fueron asignados al grupo placebo y 125 pacientes al brazo de golimumab 50mg y 109 a golimumab 100mg. Se evaluaron los índices compuestos de correlación, se encontró que estos fueron altos entre el DAS 28 y el DAPSA: índice de correlación de Sperman de 0,87, reflejando de esta manera altas correlaciones entre las evaluaciones de conteo articular.

## Valores y preferencia de pacientes

Se identificaron dos estudios, uno de corte transversal con muestreo por conveniencia realizado en Tailandia en 2018 por Chiowchanwisawakit y cols (16), en el que se incluyeron pacientes con APs en el ámbito ambulatorio, el estudio tuvo como objetivo identificar los factores asociados con los niveles de EuroQol-5, el estado de los síntomas aceptables para el paciente (PASS) y estimar las utilidades en salud en pacientes tailandeses con APs. Se incluyeron 129 pacientes, el promedio de edad fue de 47.6 (SD 12.3) años, el 53.5% fueron hombres. De los pacientes incluidos 11 (13.6%) fueron clasificados en remisión por los criterios de DAPSA y 37 (28.7%) por MDA.

Los estados de salud evaluados con el EQ-5D mostro que el problema más común fue el dolor y el malestar y el problema menos frecuente fue el derivado del autocuidado; los pacientes que tenían una mayor actividad de la enfermedad evaluada por DAPSA y MDA, así como un mayor deterioro estimado por HAQ reportaban mayores problemas en cada dominio del EQ-5D que aquellos con menor actividad de la enfermedad y menos discapacidad.

Los autores consideraron que, para mejorar la calidad de vida, el objetivo del tratamiento debe ser lograr la remisión, mejorar la función y controlar el dolor.

Fei y cols (13) realizaron una cohorte en Canadá publicada en 2019, se incluyeron 229 pacientes, el 58.5% fueron hombres con un promedio de edad de 55.5 (SD 12.8) años, el 8% tenían entesitis y solo el 1% dactilitis, el promedio de DAPSA fue de 10.5 (SD 9). Con el DAPSA, el 98% de los pacientes en remisión de la enfermedad consideraron aceptable su estado de síntomas en comparación con el 85, 22 y 18% entre aquellos con actividad de la enfermedad baja, moderada y alta, respectivamente.

## Costos

Se identificaron dos estudios, uno publicado en 2016 por Kawalec y cols(14), que evaluó los costos indirectos de la artritis psoriásica en Polonia, incluyendo los costos generados por la pérdida de productividad dado por el ausentismo laboral y la disminución de eficiencia en el trabajo. Se realizo una encuesta multicéntrica la cual costaba de dos partes una de las cuales era diligenciada por el médico y otra por el paciente. Se obtuvieron 50 cuestionarios, los costos indirectos se evaluaron con el enfoque de capital humano empleando el producto interno bruto (PIB) per cápita, el valor agregado bruto (VAB) y el ingreso bruto (IG) por trabajador en 2014 en Polonia y se expresaron en zlotys polacos (PLN) y en euros. Se documento un valor promedio de utilidad de 0.6567. El número promedio de días sin trabajo fue de 2,88 días por mes, y la pérdida de productividad media en el trabajo fue del 24,1%. Los costos indirectos mensuales promedio por paciente fueron de 206,7 € (864,01 PLN)

## GPC para pacientes con Espondiloartritis Periférica ASOREUMA

calculados utilizando el PIB, se consideró que la APs reduce la calidad de vida de los pacientes, así como la pérdida de productividad asociada al absentismo.

Poole y cols(15) , condujeron un estudio en 2010 en el Reino Unido cuyo objetivo primario fue estimar el costo anual del cuidado en salud de pacientes con APs naive para biológicos, evaluando las relaciones por gravedad de la enfermedad. Los datos fueron tomados del registro de la sociedad británica de reumatología y se utilizó un modelo multivariado para estimar la gravedad de la enfermedad a partir de datos disponibles en la atención rutinaria de cuidado primario. Se empleo el índice de discapacidad de HAQ para determinar gravedad de la enfermedad. Se incluyeron 356 casos de APs, se estimó que el promedio anual de costos de atención oscilaron entre £ 11 y £ 20 782 con una media de £ 1446 (S.D. £ 1756). Cuando los costos se sub agruparon por el puntaje de HAQ previsto, los costos anuales promedio observados variaron de £ 548 por persona para los menos afectados (HAQ 41.2) a £ 4832 para los más gravemente afectados (HAQ> 2.6). Cuando se examinó la relación entre la gravedad de la enfermedad y los costos, se encontró que el HAQ estimado era un predictor significativo de los costos totales de atención médica.

## Pregunta 9: Marco de trabajo –De la evidencia a las decisiones

| <b>PREGUNTA</b>               |                                                                                                                                          |
|-------------------------------|------------------------------------------------------------------------------------------------------------------------------------------|
| <b>POBLACION</b>              | <i>Población de espondilitis periférica</i>                                                                                              |
| <b>INTERVENCIÓN</b>           | <i>"Disease Activity Score-28 (DAS 28)" vs "Disease Activity for Psoriatic Arthritis ( DAPSA)" vs "Minimal disease activity ( MDA) "</i> |
| <b>COMPARACIÓN</b>            | <i>"Disease Activity Score-28 (DAS 28)" vs "Disease Activity for Psoriatic Arthritis ( DAPSA)" vs "Minimal disease activity ( MDA) "</i> |
| <b>DESENLAZOS PRINCIPALES</b> | <i>Sensibilidad al cambio<br/>Actividad de la enfermedad<br/>Características de la prueba</i>                                            |
| <b>ÁMBITO</b>                 | <i>Ambulatorio</i>                                                                                                                       |
| <b>PERSPECTIVA</b>            | <i>Recomendación de GPC en el contexto de espondiloartritis</i>                                                                          |
| <b>CONFLICTO DE INTERÉS:</b>  | <i>No hay ninguna declaración de conflictos de interés</i>                                                                               |

## Evaluación

| <b>Problema</b><br>¿Es el problema una prioridad? |                                      |                                    |
|---------------------------------------------------|--------------------------------------|------------------------------------|
| <b>JUICIO</b>                                     | <b>EVIDENCIA DE LA INVESTIGACION</b> | <b>CONSIDERACIONES ADICIONALES</b> |

|                                                                                                                                                                             |                                                                                                                                                                                                                                                                                                                                                                                                                                                                                                                                                                                                                                                                                                                                                                                                                                                                                                                                                                                                                                                                     |  |
|-----------------------------------------------------------------------------------------------------------------------------------------------------------------------------|---------------------------------------------------------------------------------------------------------------------------------------------------------------------------------------------------------------------------------------------------------------------------------------------------------------------------------------------------------------------------------------------------------------------------------------------------------------------------------------------------------------------------------------------------------------------------------------------------------------------------------------------------------------------------------------------------------------------------------------------------------------------------------------------------------------------------------------------------------------------------------------------------------------------------------------------------------------------------------------------------------------------------------------------------------------------|--|
| <ul style="list-style-type: none"> <li>○ No</li> <li>○ Probablemente No</li> <li>○ Probablemente Si</li> <li>○ Si</li> <li>○ Es variable</li> <li>○ No se conoce</li> </ul> | <p>La artritis psoriásica (APs) es una enfermedad inflamatoria que afecta a sujetos con antecedentes personales o familiares de psoriasis. Si bien la sinovitis es la característica principal, la prevalencia y gravedad de la entesitis, dactilitis, inflamación axial y afectación de la piel y las uñas varían y son relevantes. La evaluación de la actividad de la enfermedad es importante para determinar el objetivo del tratamiento ("Treat-to-Target"), así como la respuesta temprana a la terapia, dado que una medicación ineficaz prolongada puede no solo estar asociada con un resultado adverso de la enfermedad, sino a la posible aparición de efectos adversos y aumento de costos. (3) En la actualidad se dispone de varios índices para medir la actividad de la enfermedad, algunos evalúan un dominio de la enfermedad y otros varios dominios esto último basado en que se trata de una enfermedad cuyo compromiso no es solo articular, pero en la actualidad no existe consenso sobre cual índice utilizar en la práctica clínica.</p> |  |
|-----------------------------------------------------------------------------------------------------------------------------------------------------------------------------|---------------------------------------------------------------------------------------------------------------------------------------------------------------------------------------------------------------------------------------------------------------------------------------------------------------------------------------------------------------------------------------------------------------------------------------------------------------------------------------------------------------------------------------------------------------------------------------------------------------------------------------------------------------------------------------------------------------------------------------------------------------------------------------------------------------------------------------------------------------------------------------------------------------------------------------------------------------------------------------------------------------------------------------------------------------------|--|

### Efectos deseables (beneficios de la opción a recomendar)

¿Qué tan sustanciales son los efectos deseables de la opción?

| JUICIO                                                                                                                                                            | EVIDENCIA DE LA INVESTIGACION                                                                                                                                                                                                                                                                                                                                                                                                                                                                                      | CONSIDERACIONES ADICIONALES |
|-------------------------------------------------------------------------------------------------------------------------------------------------------------------|--------------------------------------------------------------------------------------------------------------------------------------------------------------------------------------------------------------------------------------------------------------------------------------------------------------------------------------------------------------------------------------------------------------------------------------------------------------------------------------------------------------------|-----------------------------|
| <ul style="list-style-type: none"> <li>○ Triviales</li> <li>○ Pequeños</li> <li>○ Moderados</li> <li>○ Grandes</li> <li>○ Varían</li> <li>○ No se sabe</li> </ul> | <p>¿Se debe usar 1- Índice de DAS-28 para evaluar la actividad de la enfermedad en APs?</p> <p>Ámbito: Pacientes ambulatorios</p> <p>Sensibilidad: (no agrupada) 0.76 (0.66 – 0.84)</p> <p>Especificidad (no agrupada) 0.88 (0.79 - 0.94)</p> <p>Patrón de referencia: Minimal Disease Activity (MDA)</p> <p>Referencias: Comparison of the Discriminative Capacity and Construct Validity of Six Composite Indices in a Real World [Internet]. Vol. 2014, BioMed research international. Biomed Res Int; 2014</p> |                             |

| Resultado de la prueba                                                                                                                                                                                                                                                                                                                                                                                                                                                                                                                                                                                          | Numero de resultados por 1000 pacientes testeados (95% CI) | Número de participantes (Estudios) | Certeza de la evidencia (GRADE) |
|-----------------------------------------------------------------------------------------------------------------------------------------------------------------------------------------------------------------------------------------------------------------------------------------------------------------------------------------------------------------------------------------------------------------------------------------------------------------------------------------------------------------------------------------------------------------------------------------------------------------|------------------------------------------------------------|------------------------------------|---------------------------------|
|                                                                                                                                                                                                                                                                                                                                                                                                                                                                                                                                                                                                                 | Prevalencia 0.5%<br>Visto típicamente en                   |                                    |                                 |
| <b>Verdaderos positivos</b>                                                                                                                                                                                                                                                                                                                                                                                                                                                                                                                                                                                     | <b>4</b> (3 a 4)                                           | 171                                | ⊕⊕⊕○<br><b>MODERADO</b>         |
| <b>Falsos negativos</b>                                                                                                                                                                                                                                                                                                                                                                                                                                                                                                                                                                                         | <b>1</b> (1 a 2)                                           | (1)                                |                                 |
| <b>Verdaderos negativos</b>                                                                                                                                                                                                                                                                                                                                                                                                                                                                                                                                                                                     | <b>876</b> (786 a 935)                                     | 171                                | ⊕⊕⊕○<br><b>MODERADO</b>         |
| <b>Falsos positivos</b>                                                                                                                                                                                                                                                                                                                                                                                                                                                                                                                                                                                         | <b>119</b> (60 a 209)                                      | (1)                                |                                 |
| <b>Complicaciones **</b>                                                                                                                                                                                                                                                                                                                                                                                                                                                                                                                                                                                        |                                                            | (0)                                | -                               |
| <p>1. Estudio de Cohorte trasversal que no permite evaluar el cambio y con tamaño de muestra pequeña</p> <p>¿Se debe usar 2- índice de DAPSA para evaluar la actividad de la enfermedad en APs?<br/> Ámbito: Pacientes ambulatorios<br/> Sensibilidad: (no agrupada) 0.77 (0.67 – 0.85)<br/> Especificidad (no agrupada) 0.88 (0.79 - 0.94)<br/> Patrón de referencia: Minimal Disease Activity (MDA)<br/> Referencia: Comparison of the Discriminative Capacity and Construct Validity of Six Composite Indices in a Real World [Internet]. Vol. 2014, BioMed research international. Biomed Res Int; 2014</p> |                                                            |                                    |                                 |

| Resultado de la prueba                                                                           | Number of results per 1000 patients tested (95% CI) | Número de participantes (Estudios ) | Certainty of the Evidence (GRADE) |
|--------------------------------------------------------------------------------------------------|-----------------------------------------------------|-------------------------------------|-----------------------------------|
|                                                                                                  | Prevalencia 0.5%<br>Visto típicamente en            |                                     |                                   |
| <b>verdaderos positivos</b>                                                                      | <b>4</b> (3 a 4)                                    | 171<br>(1)                          | ⊕⊕⊕○<br><b>MODERADO</b>           |
| <b>Falsos negativos</b>                                                                          | <b>1</b> (1 a 2)                                    |                                     |                                   |
| <b>Verdaderos negativos</b>                                                                      | <b>876</b> (786 a 935)                              | 171<br>(1)                          | ⊕⊕⊕○<br><b>MODERADO</b>           |
| <b>Falsos positivos</b>                                                                          | <b>119</b> (60 a 209)                               |                                     |                                   |
| <b>Complicaciones **</b>                                                                         | <b>No reportada</b>                                 | (0)                                 | -                                 |
| 1.Estudio de Cohorte trasversal que no permite evaluar el cambio y con tamaño de muestra pequeña |                                                     |                                     |                                   |

**Efectos Indeseables**

¿Qué tan sustanciales son los efectos indeseables que se pueden anticipar?

| JUICIO | EVIDENCIA DE LA INVESTIGACION | CONSIDERACIONES ADICIONALES |
|--------|-------------------------------|-----------------------------|
|--------|-------------------------------|-----------------------------|

|                                                                                                                                                                          |                                                                                                                                                                                                                                                                                                                                                                      |  |
|--------------------------------------------------------------------------------------------------------------------------------------------------------------------------|----------------------------------------------------------------------------------------------------------------------------------------------------------------------------------------------------------------------------------------------------------------------------------------------------------------------------------------------------------------------|--|
| <ul style="list-style-type: none"> <li>○ Triviales</li> <li>○ <b>Pequeños</b></li> <li>○ Moderados</li> <li>○ Grandes</li> <li>○ Varían</li> <li>○ No se sabe</li> </ul> | La aplicación de índices de medición de la actividad de la enfermedad no impone riesgos, pueden ser aplicados por personal de la salud. La evidencia de actividad de la enfermedad puede llevar a escalonamiento terapéutico y aumento de costos de la terapia, pero la evaluación objetiva de la actividad permitirá brindar un tratamiento dirigido a un objetivo. |  |
|--------------------------------------------------------------------------------------------------------------------------------------------------------------------------|----------------------------------------------------------------------------------------------------------------------------------------------------------------------------------------------------------------------------------------------------------------------------------------------------------------------------------------------------------------------|--|

### Certeza en la Evidencia

¿Cuál es la certeza en la evidencia global sobre los efectos de la opción a recomendar?

| JUICIO                                                                                                                                                                                                                                                                                                                                                                                                                                                                                                                                                                                                                                                                                                                                                                                                                                                                                                                                                                                                                                                                                                                                                                                                                                                                                                                                                                                                                                                                                                                                                                                                                                                                                                                                                                                                                                                                                                                                                                                                                                                                                                                                                                                                                                                                                                                                                                                                                                                                                                                                                                                                                                                                                                                                                                                                                                                                                                                                                                                                                                                                                                                                                                                                                                                                                                                                                                                                                                                                                                                                                                                                                                                                                                                                                                                                                                                                                                                                                                                                                                                                                                                                                                                                                                                                                                                                                                                                                                                                                                                                                                                                                                                                                                                                                                                                                                                                                                                                                                                                                                                                                                                                                                                                                                                                                                                                                                                                                                                                                                                                                                                                                                                                                                                                                                                                                                                                                                                                                                                                                                                                                                                                                                                                                                                                                                                                                                                                                                                                                                                                                                                                                                                                                                                                                                                                                                                                                                                                                                                                                                                                                                                                                                                                                                                                                                                                                                                                                                                                                                                                                                                                                                                                                                                                                                                                                                                                                                                                                                                                                                                                                                                                                                                                                                                                                                                                                                                                                                                                                                                                                                                                                                                                                                                                                                                                                                                                                                                                                                                                                                                                                                                                                                                                                                                                                                                                                                                                                                                                                                                                                                                                                                                                                                                                                                                                                                                                                                                                                                                                                                                                                                                                                                                                                                                                                                                                                                                                                                                                                                                                                                                                                                                                                                                                                                                                                                                                                                                                                                                                                                                                                                                                                                                                                                                                                                                                                                                                                                                                                                                                                                                                                                                                                                                                                                                                                                                                                                                                                                                                                                                                                                                                                                                                                                                                                                                                                                                                                                                                                                                                                                                                                                                                                                                                                                                                                                                                                                                                                                                                                                                                                                                                                                                                                                                                                                                                                                                                                                                                                                                                                                                                                                                                                                                                                                                                                                                                                                                                                                                                                                                                                                                                                                                                                                                                                                                                                                                                                                                                                                                                                                                                                                                                                                                                                                                                                                                                                                                                                                                                                                                                                                                                                                                                                                                                                                                                                                                                                                                                                                                                                                                                                                                                                                                                                                                                                                                                                                                                                                                                                                                                                                                                                                                                                                                                                                                                                                                                                                                                                                                                                                                                                                                                                                                                                                                                                                                                                                                                                                                                                                                                                                                                                                                                                                                                                                                                                                                                                                                                                                                                                                                                                                                                                                                                                                                                                                                                                                                                                                                                                                                                                                                                                                                                                                                                                                                                                                                                                                                                                                                                                                                                                                                                                                                                                                                                                                                                                                                                                                                                                                                                                                                                                                                                                                                                                                                                                                                                                                                                                                                                                                                                                                                                                                                                                                                                                                                                                                                                                                                                                                                                                                                                                                                                                                                                                                                                                                                                                                                                                                                                                                                                                                                                                                                                                                                                                                                                                                                                                                                                                                                                                                                                                                                                                                                                                                                                                                                                                                                                                                                                                                                                                                                                                                                                                                                                                                                                                                                                                                                                                                                                                                                                                                                                                                                                                                                                                                                                                                                                                                                                                                                                                                                                                                                                                                                                                                                                                                                                                                                                                                                                                                                                                                                                                                                                                                                                                                                                                                                                                                                                                                                                                                                                                                                                                                                                                                                                                                                                                                                                                                                                                                                                                                                                                                                                                                                                                                                                                                                                                                                                                                                                                                                                                                                                                                                                                                                                                                                                                                                                                                                                                                                                                                                                                                                                                                                                                                                                                                                                                                                                                                                                                                                                                                                                                                                                                                                                                                                                                                                                                                                                                                                                                                                                                                                                                                                                                                                                                                                                                                                                                                                                                                                                                                                                                                                                                                                                                                                                                                                                                                                                                                                                                                                                                                                                                                                                                                                                                                                                                                                                                                                                                                                                                                                                                                                                                                                                                                                                                                                                                                                                                                                                                                                                                                                                                                                                                                                                                                                                                                                                                                                                                                                                                                                                                                                                                                                                                                                                                                                                                                                                                                                                                                                                                                                                                                                                                                                                                                                                                                                                                                                                                                                                                                                                                                                                                                                                                                                                                                                                                                                                                                                                                                                                                                                                                                                                                                                                                                                                                                                                                                                                                                                                                                                                                                                                                                                                                                                                                                                                                                                                                                                                                                                                                                                                                                                                                                                                                                                                                                                                                                                                                                                                                                                                                                                                                                                                                                                                                                                                                                                                                                                                                                                                                                                                                                                                                                                                                                                                                                                                                                                                                                                                                                                                                                                                                                                                                                                                                                                                                                                                                                                                                                                                                                                                                                                                                                                                                                                                                                                                                                                                                                                                                                                                                                                                                                                                                                                                                                                                                                                                                                                                                                                                                                                                                                                                                                                                                                                                                                                                                                                                                                                                                                                                                                                                                                                                                                                                                                                                                                                                                                                                            | EVIDENCIA DE LA INVESTIGACION |  |  | CONSIDERACIONES ADICIONALES |
|---------------------------------------------------------------------------------------------------------------------------------------------------------------------------------------------------------------------------------------------------------------------------------------------------------------------------------------------------------------------------------------------------------------------------------------------------------------------------------------------------------------------------------------------------------------------------------------------------------------------------------------------------------------------------------------------------------------------------------------------------------------------------------------------------------------------------------------------------------------------------------------------------------------------------------------------------------------------------------------------------------------------------------------------------------------------------------------------------------------------------------------------------------------------------------------------------------------------------------------------------------------------------------------------------------------------------------------------------------------------------------------------------------------------------------------------------------------------------------------------------------------------------------------------------------------------------------------------------------------------------------------------------------------------------------------------------------------------------------------------------------------------------------------------------------------------------------------------------------------------------------------------------------------------------------------------------------------------------------------------------------------------------------------------------------------------------------------------------------------------------------------------------------------------------------------------------------------------------------------------------------------------------------------------------------------------------------------------------------------------------------------------------------------------------------------------------------------------------------------------------------------------------------------------------------------------------------------------------------------------------------------------------------------------------------------------------------------------------------------------------------------------------------------------------------------------------------------------------------------------------------------------------------------------------------------------------------------------------------------------------------------------------------------------------------------------------------------------------------------------------------------------------------------------------------------------------------------------------------------------------------------------------------------------------------------------------------------------------------------------------------------------------------------------------------------------------------------------------------------------------------------------------------------------------------------------------------------------------------------------------------------------------------------------------------------------------------------------------------------------------------------------------------------------------------------------------------------------------------------------------------------------------------------------------------------------------------------------------------------------------------------------------------------------------------------------------------------------------------------------------------------------------------------------------------------------------------------------------------------------------------------------------------------------------------------------------------------------------------------------------------------------------------------------------------------------------------------------------------------------------------------------------------------------------------------------------------------------------------------------------------------------------------------------------------------------------------------------------------------------------------------------------------------------------------------------------------------------------------------------------------------------------------------------------------------------------------------------------------------------------------------------------------------------------------------------------------------------------------------------------------------------------------------------------------------------------------------------------------------------------------------------------------------------------------------------------------------------------------------------------------------------------------------------------------------------------------------------------------------------------------------------------------------------------------------------------------------------------------------------------------------------------------------------------------------------------------------------------------------------------------------------------------------------------------------------------------------------------------------------------------------------------------------------------------------------------------------------------------------------------------------------------------------------------------------------------------------------------------------------------------------------------------------------------------------------------------------------------------------------------------------------------------------------------------------------------------------------------------------------------------------------------------------------------------------------------------------------------------------------------------------------------------------------------------------------------------------------------------------------------------------------------------------------------------------------------------------------------------------------------------------------------------------------------------------------------------------------------------------------------------------------------------------------------------------------------------------------------------------------------------------------------------------------------------------------------------------------------------------------------------------------------------------------------------------------------------------------------------------------------------------------------------------------------------------------------------------------------------------------------------------------------------------------------------------------------------------------------------------------------------------------------------------------------------------------------------------------------------------------------------------------------------------------------------------------------------------------------------------------------------------------------------------------------------------------------------------------------------------------------------------------------------------------------------------------------------------------------------------------------------------------------------------------------------------------------------------------------------------------------------------------------------------------------------------------------------------------------------------------------------------------------------------------------------------------------------------------------------------------------------------------------------------------------------------------------------------------------------------------------------------------------------------------------------------------------------------------------------------------------------------------------------------------------------------------------------------------------------------------------------------------------------------------------------------------------------------------------------------------------------------------------------------------------------------------------------------------------------------------------------------------------------------------------------------------------------------------------------------------------------------------------------------------------------------------------------------------------------------------------------------------------------------------------------------------------------------------------------------------------------------------------------------------------------------------------------------------------------------------------------------------------------------------------------------------------------------------------------------------------------------------------------------------------------------------------------------------------------------------------------------------------------------------------------------------------------------------------------------------------------------------------------------------------------------------------------------------------------------------------------------------------------------------------------------------------------------------------------------------------------------------------------------------------------------------------------------------------------------------------------------------------------------------------------------------------------------------------------------------------------------------------------------------------------------------------------------------------------------------------------------------------------------------------------------------------------------------------------------------------------------------------------------------------------------------------------------------------------------------------------------------------------------------------------------------------------------------------------------------------------------------------------------------------------------------------------------------------------------------------------------------------------------------------------------------------------------------------------------------------------------------------------------------------------------------------------------------------------------------------------------------------------------------------------------------------------------------------------------------------------------------------------------------------------------------------------------------------------------------------------------------------------------------------------------------------------------------------------------------------------------------------------------------------------------------------------------------------------------------------------------------------------------------------------------------------------------------------------------------------------------------------------------------------------------------------------------------------------------------------------------------------------------------------------------------------------------------------------------------------------------------------------------------------------------------------------------------------------------------------------------------------------------------------------------------------------------------------------------------------------------------------------------------------------------------------------------------------------------------------------------------------------------------------------------------------------------------------------------------------------------------------------------------------------------------------------------------------------------------------------------------------------------------------------------------------------------------------------------------------------------------------------------------------------------------------------------------------------------------------------------------------------------------------------------------------------------------------------------------------------------------------------------------------------------------------------------------------------------------------------------------------------------------------------------------------------------------------------------------------------------------------------------------------------------------------------------------------------------------------------------------------------------------------------------------------------------------------------------------------------------------------------------------------------------------------------------------------------------------------------------------------------------------------------------------------------------------------------------------------------------------------------------------------------------------------------------------------------------------------------------------------------------------------------------------------------------------------------------------------------------------------------------------------------------------------------------------------------------------------------------------------------------------------------------------------------------------------------------------------------------------------------------------------------------------------------------------------------------------------------------------------------------------------------------------------------------------------------------------------------------------------------------------------------------------------------------------------------------------------------------------------------------------------------------------------------------------------------------------------------------------------------------------------------------------------------------------------------------------------------------------------------------------------------------------------------------------------------------------------------------------------------------------------------------------------------------------------------------------------------------------------------------------------------------------------------------------------------------------------------------------------------------------------------------------------------------------------------------------------------------------------------------------------------------------------------------------------------------------------------------------------------------------------------------------------------------------------------------------------------------------------------------------------------------------------------------------------------------------------------------------------------------------------------------------------------------------------------------------------------------------------------------------------------------------------------------------------------------------------------------------------------------------------------------------------------------------------------------------------------------------------------------------------------------------------------------------------------------------------------------------------------------------------------------------------------------------------------------------------------------------------------------------------------------------------------------------------------------------------------------------------------------------------------------------------------------------------------------------------------------------------------------------------------------------------------------------------------------------------------------------------------------------------------------------------------------------------------------------------------------------------------------------------------------------------------------------------------------------------------------------------------------------------------------------------------------------------------------------------------------------------------------------------------------------------------------------------------------------------------------------------------------------------------------------------------------------------------------------------------------------------------------------------------------------------------------------------------------------------------------------------------------------------------------------------------------------------------------------------------------------------------------------------------------------------------------------------------------------------------------------------------------------------------------------------------------------------------------------------------------------------------------------------------------------------------------------------------------------------------------------------------------------------------------------------------------------------------------------------------------------------------------------------------------------------------------------------------------------------------------------------------------------------------------------------------------------------------------------------------------------------------------------------------------------------------------------------------------------------------------------------------------------------------------------------------------------------------------------------------------------------------------------------------------------------------------------------------------------------------------------------------------------------------------------------------------------------------------------------------------------------------------------------------------------------------------------------------------------------------------------------------------------------------------------------------------------------------------------------------------------------------------------------------------------------------------------------------------------------------------------------------------------------------------------------------------------------------------------------------------------------------------------------------------------------------------------------------------------------------------------------------------------------------------------------------------------------------------------------------------------------------------------------------------------------------------------------------------------------------------------------------------------------------------------------------------------------------------------------------------------------------------------------------------------------------------------------------------------------------------------------------------------------------------------------------------------------------------------------------------------------------------------------------------------------------------------------------------------------------------------------------------------------------------------------------------------------------------------------------------------------------------------------------------------------------------------------------------------------------------------------------------------------------------------------------------------------------------------------------------------------------------------------------------------------------------------------------------------------------------------------------------------------------------------------------------------------------------------------------------------------------------------------------------------------------------------------------------------------------------------------------------------------------------------------------------------------------------------------------------------------------------------------------------------------------------------------------------------------------------------------------------------------------------------------------------------------------------------------------------------------------------------------------------------------------------------------------------------------------------------------------------------------------------------------------------------------------------------------------------------------------------------------------------------------------------------------------------------------------------------------------------------------------------------------------------------------------------------------------------------------------------------------------------------------------------------------------------------------------------------------------------------------------------------------------------------------------------------------------------------------------------------------------------------------------------------------------------------------------------------------------------------------------------------------------------------------------------------------------------------------------------------------------------------------------------------------------------------------------------------------------------------------------------------------------------------------------------------------------------------------------------------------------------------------------------------------------------------------------------------------------------------------------------------------------------------------------------------------------------------------------------------------------------------------------------------------------------------------------------------------------------------------------------------------------------------------------------------------------------------------------------------------------------------------------------------------------------------------------------------------------------------------------------------------------------------------------------------------------------------------------------------------------------------------------------------------------------------------------------------------------------------------------------------------------------------------------------------------------------------------------------------------------------------------------------------------------------------------------------------------------------------------------------------------------------------------------------------------------------------------------------------------------------------------------------------------------------------------------------------------------------------------------------------------------------------------------------------------------------------------------------------------------------------------------------------------------------------------------------------------------------------------------------------------------------------------------------------------------------------------------------------------------------------------------------------------------------------------------------------------------------------------------------------------------------------------------------------------------------------------------------------------------------------------------------------------------------------------------------------------------------------------------------------------------------------------------------------------------------------------------------------------------------------------------------------------------------------------------------------------------------------------------------------------------------------------------------------------------------------------------------------------------------------------------------------------------------------------------------------------------------------------------------------------------------------------------------------------------------------------------------------------------------------------------------------------------------------------------------------------------------------------------------------------------------------------------------------------------------------------------------------------------------------------------------------------------------------------------------------------------------------------------------------------------------------------------------------------------------------------------------------------------------------------------------------------------------------------------------------------------------------------------------------------------------------------------------------------------------------------------------------------------------------------------------------------------------------------------------------------------------------------------------------------------------------------------------------------------------------------------------------------------------------------------------------------------------------------------------------------------------------------------------------------------------------------------------------------------------------------------------------------------------------------------------------------------------------------------------------------------------------------------------------------------------------------------------------------------------------------------------------------------------------------------------------------------------------------------------------------------------------------------------------------------------------------------------------------------------------------------------------------------------------------------------------------------------------------------------------------------------------------------------------------------------------------------------------------------------------------------------------------------------------------------------------------------------------------------------------------------------------------------------------------------------------------------------------------------------------------------------------------------------------------------------------------------------------------------------------------------------------------------------------------------------------------------------------------------------------------------------------------------------------------------------------------------------------------------------------------------------------------------------------------------------------------------------------------------------------------------------------------------------------------------------------------------------------------------------------------------------------------------------------------------------------------------------------------------------------------------------------------------------------------------------------------------------------------------------------------------------------------------------------------------------------------------------------------------------------------------------------------------------------------------------------------------------------------------------------------------------------------------------------------------------------------------------------------------------------------------------------------------------------------------------------------------------------------------------------------------------------------------------------------------------------------------------------------------------------------------------------------------------------------------------------------------------------------------------------------------------------------------------------------------------------------------------------------------------------------------------------------------------------------------------------------------------------------------------------------------------------------------------------------------------------------------------------------------------------------------------------------------------------------------------------------------------------------------------------------------------------------------------------------------------------------------------------------------------------------------------------------------------------------------------------------------------------------------------------------------------------------------------------------------------------------------------------------------------------------------------------------------------------------------------------------------------------------------------------------------------------------------------------------------------------------------------------------------------------------------------------------------------------------------------------------------------------------------------------------------------------------------------------------------------------------------------------------------------------------------------------------------------------------------------------------------------------------------------------------------------------------------------------------------------------------------------------------------------------------------------------------------------------------------------------------------------------------------------------------------------------------------------------------------------------------------------------------------------------------------------------------------------------------------------------------------------------------------------------------------------------------------------------------------------------------------------------------------------------------------------------------------------------------------------------------------------------------------------------------------------------------------------------------------------------------------------------------------------------------------------------------------------------------------------------------------------------------------------------------------------------------------------------------------------------------------------------------------------------------------------------------------------------------------------------------------------------------------------------------------------------------------------------------------------------------------------------------------------------------------------------------------------------------------------------------------------------------------------------------------------------------------------------------------------------------------------------------------------------------------------------------------------------------------------------------------------------------------------------------------------------------------------------------------------------------------------------------------------------------------------------------------------------------------------------------------------------------------------------------------------------------------------------------------------------------------------------------------------------------------------------------------------------------------------------------------------------------------------------------------------------------------------------------------------------------------------------------------------------------------------------------------------------------------------------------------------------------------------------------------------------------------------------------------------------------------------------------------------------------------------------------------------------------------------------------------------------------------------------------------------------------------------------------------------------------------------------------------------------------------------------------------------------------------------------------------------------------------------------------------------------------------------------------------------------------------------------------------------------------------------------------------------------------------------------------------------------------------------------------------------------------------------------------------------------------------------------------------------------------------------------------------------------------------------------------------------------------------------------------------------------------------------------------------------------------------------------------------------------------------------------------------------------------------------------------------------------------------------------------------------------------------------------------------------------------------------------------------------------------------------------------------------------------------------------------------------------------------------------------------------------------------------------------------------------------------------------------------------------------------------------------------------------------------------------------------------------------------------------------|-------------------------------|--|--|-----------------------------|
| <div><div><div></div><div></div><div></div><div></div><div></div></div><div><div></div><div></div><div></div><div></div><div></div></div><div><div></div><div></div><div></div><div></div><div></div></div><div><div></div><div></div><div></div><div></div><div></div></div><div><div></div><div></div><div></div><div></div><div></div></div></div> <div><div></div><div></div><div></div><div></div><div></div></div> <div><div></div><div></div>&lt;</div> |                               |  |  |                             |

### Valores de los pacientes

¿Hay variación o poca certeza sobre cómo valoran las personas/los pacientes los desenlaces principales?

| JUICIO | EVIDENCIA DE LA INVESTIGACION | CONSIDERACIONES ADICIONALES |
|--------|-------------------------------|-----------------------------|
|        |                               |                             |

|                                                                                                                                                                                                                                                                                                  |                                                                                                                                                                                                                                                                                                                                                                                                                                                                                                      |                                    |
|--------------------------------------------------------------------------------------------------------------------------------------------------------------------------------------------------------------------------------------------------------------------------------------------------|------------------------------------------------------------------------------------------------------------------------------------------------------------------------------------------------------------------------------------------------------------------------------------------------------------------------------------------------------------------------------------------------------------------------------------------------------------------------------------------------------|------------------------------------|
| <ul style="list-style-type: none"> <li>○ Variabilidad o incertidumbre importante</li> <li>○ Posiblemente hay variabilidad o incertidumbre importante</li> <li>○ Posiblemente No hay variabilidad o incertidumbre importante</li> <li>○ No hay variabilidad o incertidumbre importante</li> </ul> | <p>El estudio de Chiowchanwisawakit y cols (16), mostró que los pacientes que tenían una mayor actividad de la enfermedad evaluada por DAPSA y MDA, así como un mayor deterioro estimado por HAQ reportaban mayores problemas en cada dominio del EQ-5D que aquellos con menor actividad de la enfermedad y menos discapacidad. Los autores consideraron que, para mejorar la calidad de vida, el objetivo del tratamiento debe ser lograr la remisión, mejorar la función y controlar el dolor.</p> |                                    |
| <b>Balance de los efectos</b><br>¿El balance entre los efectos deseables e indeseables favorece la opción o el comparador?                                                                                                                                                                       |                                                                                                                                                                                                                                                                                                                                                                                                                                                                                                      |                                    |
| <b>JUICIO</b>                                                                                                                                                                                                                                                                                    | <b>EVIDENCIA DE LA INVESTIGACION</b>                                                                                                                                                                                                                                                                                                                                                                                                                                                                 | <b>CONSIDERACIONES ADICIONALES</b> |

|                                                                                                                                                                                                                                                                                                                         |                                                                                                           |                                    |
|-------------------------------------------------------------------------------------------------------------------------------------------------------------------------------------------------------------------------------------------------------------------------------------------------------------------------|-----------------------------------------------------------------------------------------------------------|------------------------------------|
| <ul style="list-style-type: none"> <li>○ Favorece al comparador</li> <li>○ Probablemente favorece al comparador</li> <li>○ No favorece al comparador ni a la opción en evaluación</li> <li>○ Probablemente favorece a la opción</li> <li>○ Favorece a la intervención</li> <li>○ Varía</li> <li>○ No se sabe</li> </ul> | Se considera que el balance entre los efectos deseables e indeseables favorece el uso de la intervención. |                                    |
| <b>Recursos requeridos</b><br><b>Que tan grande es el requerimiento de recursos (costos)?</b>                                                                                                                                                                                                                           |                                                                                                           |                                    |
| <b>JUICIO</b>                                                                                                                                                                                                                                                                                                           | <b>EVIDENCIA DE LA INVESTIGACION</b>                                                                      | <b>CONSIDERACIONES ADICIONALES</b> |

|                                                                                                                                                                                                                                                       |                                                                                                                                                                                                                                                                                                                                                                                                                                                               |  |
|-------------------------------------------------------------------------------------------------------------------------------------------------------------------------------------------------------------------------------------------------------|---------------------------------------------------------------------------------------------------------------------------------------------------------------------------------------------------------------------------------------------------------------------------------------------------------------------------------------------------------------------------------------------------------------------------------------------------------------|--|
| <ul style="list-style-type: none"> <li>○ Grandes costos</li> <li>○ Costos moderados</li> <li>○ no significantes</li> <li>costos ni ahorros</li> <li>○ Moderados ahorros</li> <li>○ Grandes ahorros</li> <li>○ Varían</li> <li>○ No se sabe</li> </ul> | El estudio de Kawalec y cols(14) documento que el número promedio de días sin trabajo fue de 2,88 días por mes, y la pérdida de productividad media en el trabajo fue del 24,1%. Los costos indirectos mensuales promedio por paciente fueron de 206,7 € (864,01 PLN) calculados utilizando el PIB, se consideró que la APs reduce la calidad de vida de los pacientes, así como la pérdida de productividad asociada tanto al absentismo como al presentismo |  |
|-------------------------------------------------------------------------------------------------------------------------------------------------------------------------------------------------------------------------------------------------------|---------------------------------------------------------------------------------------------------------------------------------------------------------------------------------------------------------------------------------------------------------------------------------------------------------------------------------------------------------------------------------------------------------------------------------------------------------------|--|

### Equidad

¿La implementación de la opción, tendrá impacto en la equidad?

| JUICIO                                                                                                                                                                                                            | EVIDENCIA DE LA INVESTIGACION                                         | CONSIDERACIONES ADICIONALES |
|-------------------------------------------------------------------------------------------------------------------------------------------------------------------------------------------------------------------|-----------------------------------------------------------------------|-----------------------------|
| <ul style="list-style-type: none"> <li>○ Reduce</li> <li>○ Probablemente se reduce la equidad</li> <li>○ Probablemente no impacta la equidad</li> <li>○ Probablemente incrementa</li> <li>○ Incrementa</li> </ul> | No se identifican estudios de impacto de estas escalas en la equidad. |                             |

|                                                                                                                                                                                                                        |                                                                                                                                                                                                                                                                                                                                                                                                                                                                                      |                                    |
|------------------------------------------------------------------------------------------------------------------------------------------------------------------------------------------------------------------------|--------------------------------------------------------------------------------------------------------------------------------------------------------------------------------------------------------------------------------------------------------------------------------------------------------------------------------------------------------------------------------------------------------------------------------------------------------------------------------------|------------------------------------|
| <input type="radio"/> Varia<br><input checked="" type="radio"/> No se sabe                                                                                                                                             |                                                                                                                                                                                                                                                                                                                                                                                                                                                                                      |                                    |
| <b>Aceptabilidad</b><br>¿Es la opción aceptada por los diferentes actores involucrados en su implementación?                                                                                                           |                                                                                                                                                                                                                                                                                                                                                                                                                                                                                      |                                    |
| <b>JUICIO</b>                                                                                                                                                                                                          | <b>EVIDENCIA DE LA INVESTIGACION</b>                                                                                                                                                                                                                                                                                                                                                                                                                                                 | <b>CONSIDERACIONES ADICIONALES</b> |
| <input type="radio"/> No<br><input type="radio"/> Probablemente no<br><input checked="" type="radio"/> Probablemente si<br><input type="radio"/> Si<br><input type="radio"/> Varia<br><input type="radio"/> No se sabe | La actualización de las recomendaciones del Task force para el tratamiento de la espondiloartritis y la espondiloartritis periférica publicada en 2017 (2) la cual empleo una metodología de revisión de la literatura y consenso para la generación de recomendaciones considero la realización del DAPSA o MDA, la graduación de las recomendaciones se realizó por la clasificación de Oxford Evidence-Based Medicine con un nivel de acuerdo de 7.9 (SD 2.5, en escala de 0-10). |                                    |
| <b>Factibilidad</b><br>¿Es la opción factible de IMPLEMENTAR?                                                                                                                                                          |                                                                                                                                                                                                                                                                                                                                                                                                                                                                                      |                                    |
| <b>JUICIO</b>                                                                                                                                                                                                          | <b>EVIDENCIA DE LA INVESTIGACION</b>                                                                                                                                                                                                                                                                                                                                                                                                                                                 | <b>CONSIDERACIONES ADICIONALES</b> |
| <input type="radio"/> No<br><input type="radio"/> Probablemente no<br><input type="radio"/> Probablemente si                                                                                                           | No se encontraron estudios de factibilidad de pacientes en espondiloartritis con relación a los procesos diagnósticos                                                                                                                                                                                                                                                                                                                                                                |                                    |

|                                                                                                        |  |  |
|--------------------------------------------------------------------------------------------------------|--|--|
| <input type="radio"/> Si<br><input type="radio"/> Varia<br><input checked="" type="radio"/> No se sabe |  |  |
|--------------------------------------------------------------------------------------------------------|--|--|

## Resumen de Juicios

|                         | JUICIOS                                 |                                                      |                                                          |                                            |                          |       |                     |
|-------------------------|-----------------------------------------|------------------------------------------------------|----------------------------------------------------------|--------------------------------------------|--------------------------|-------|---------------------|
| PROBLEMA                | No                                      | Probablemente no                                     | Probablemente si                                         | Si                                         |                          | Varia | No se sabe          |
| EFFECTOS DESEABLES      | Triviales                               | Pequeños                                             | Moderados                                                | Grandes                                    |                          | Varia | No se sabe          |
| EFFECTOS INDESEABLES    | Grandes                                 | Moderados                                            | Pequeños                                                 | Triviales                                  |                          | Varia | No se sabe          |
| CERTEZA EN LA EVIDENCIA | Muy Baja                                | Baja                                                 | Moderada                                                 | Alta                                       |                          |       | No incluyó estudios |
| VALORES DE PACIENTES    | Importante incertidumbre o variabilidad | Posiblemente Importante incertidumbre o variabilidad | Probablemente No Importante incertidumbre o variabilidad | No Importante incertidumbre o variabilidad |                          |       |                     |
| BALANCE DE LOS EFECTOS  | Favorece el comparador                  | Probablemente Favorece el comparador                 | No favorece Ni la intervención ni el comparador          | Probablemente favorece la intervención     | Favorece la intervención | Varia | No se sabe          |

|                     | JUICIOS        |                        |                                  |                            |                 |       |            |
|---------------------|----------------|------------------------|----------------------------------|----------------------------|-----------------|-------|------------|
| RECURSOS REQUERIDOS | Grandes costos | Moderados costos       | Costos y ahorros insignificantes | Moderados ahorros          | Grandes ahorros | Varia | No se sabe |
| EQUIDAD             | Reducida       | Probablemente reducida | Probablemente no impactada       | Probablemente incrementada | Incrementada    | Varia | No se sabe |
| ACEPTABILIDAD       | No             | Probablemente No       | Probablemente Si                 | Si                         |                 | Varia | No se sabe |
| FACTIBILIDAD        | No             | Probablemente No       | Probablemente Si                 | Si                         |                 | Varia | No se sabe |

### Tipo de Recomendación

|                                                  |                                                       |                                                                                |                                                     |                                                |
|--------------------------------------------------|-------------------------------------------------------|--------------------------------------------------------------------------------|-----------------------------------------------------|------------------------------------------------|
| Recomendación fuerte en contra de la opción<br>○ | Recomendación condicional en contra de la opción<br>○ | Recomendación condicional a favor de cualquiera la opción o su comparador<br>○ | Recomendación condicional a favor de la opción<br>○ | Recomendación fuerte a favor de la opción<br>○ |
|--------------------------------------------------|-------------------------------------------------------|--------------------------------------------------------------------------------|-----------------------------------------------------|------------------------------------------------|

### Conclusiones

|               |
|---------------|
| Recomendación |
|---------------|

En pacientes con artritis psoriásica se recomienda evaluar la actividad de la enfermedad con DAPSA por su adecuada capacidad de discriminar la actividad de la enfermedad. Recomendación condicional a favor de la intervención. Certeza de la evidencia moderada

### Justificación

El DAPSA se enfoca principalmente en la enfermedad articular periférica y puede reflejar con precisión cambios en este dominio. Sin embargo, dado que no mide otros dominios de la enfermedad, se podría perder la documentación de actividad, es así como se ha descrito alta actividad de la enfermedad en piel en pacientes en remisión evaluada por DAPSA con un importante impacto en la calidad de vida.

### Consideraciones por subgrupos

El panel no identificó ninguna consideración especial para subgrupos de pacientes. Sin embargo definió el siguiente PUNTO DE BUENA PRACTICA:  
En caso de poderse realizar, se sugiere complementar la evaluación con la escala MDA

### Consideraciones de implementación

No se identifican consideraciones relevantes para su implementación.

### Monitoreo y evaluación de cumplimiento

Se definiran coo parte del plan de implementación

### Prioridades de investigación futura

Es importante resaltar que se requieren estudios más rigurosamente conducidos que evaléun las ideferentes escalas para seguimiento d ela actividad en espondiolartritis periférica no psoriasica.

## GPC para pacientes con Espondiloartritis Periférica ASOREUMA

## Pregunta 9: Tabla de resumens de hallazgos GRADE

Se debe usar 1- Índice de DAS-28 para evaluar la actividad de la enfermedad en PsA?

Ámbito: Pacientes ambulatorios

Sensibilidad: (no agrupada) 0.76 (0.66 – 0.84)

Especificidad (no agrupada) 0.88 (0.79 - 0.94)

Patrón de referencia: Minimal Disease Activity (MDA)

Referencias: Comparison of the Discriminative Capacity and Construct Validity of Six Composite Indices in a Real World [Internet]. Vol. 2014, BioMed research international. Biomed Res Int; 2014

| Resultado de la prueba      | Number of results per 1000 patients tested (95% CI) | Número de participantes (Estudios ) | Certainty of the Evidence (GRADE) |
|-----------------------------|-----------------------------------------------------|-------------------------------------|-----------------------------------|
|                             | Prevalencia 0.5%<br>Visto típicamente en            |                                     |                                   |
| <b>Verdaderos positivos</b> | <b>4</b> (3 a 4)                                    | 171                                 | ⊕⊕⊕○                              |
| <b>Falsos negativos</b>     | <b>1</b> (1 a 2)                                    | (1)                                 | <b>MODERADO</b>                   |
| <b>Verdaderos negativos</b> | <b>876</b> (786 a 935)                              | 171                                 | ⊕⊕⊕○                              |
| <b>Falsos positivos</b>     | <b>119</b> (60 a 209)                               | (1)                                 | <b>MODERADO</b>                   |
| <b>Complicaciones **</b>    |                                                     | (0)                                 | -                                 |

1. Estudio de Cohorte trasversal que no permite evaluar el cambio y con tamaño de muestra pequeña

Se debe usar 2- Índice de DAPSA para evaluar la actividad de la enfermedad en PsA?

Ámbito: Pacientes ambulatorios

Sensibilidad: (no agrupada) 0.77 (0.67 – 0.85)

Especificidad (no agrupada) 0.88 (0.79 - 0.94)

Patrón de referencia: Minimal Disease Activity (MDA)

Referencia: Comparison of the Discriminative Capacity and Construct Validity of Six Composite Indices in a Real World [Internet]. Vol. 2014, BioMed research international. Biomed Res Int; 2014

| Resultado de la prueba      | Number of results per 1000 patients tested (95% CI) | Número de participantes (Estudios ) | Certainty of the Evidence (GRADE) |
|-----------------------------|-----------------------------------------------------|-------------------------------------|-----------------------------------|
|                             | Prevalencia 0.5%<br>Visto típicamente en            |                                     |                                   |
| <b>verdaderos positivos</b> | <b>4</b> (3 a 4)                                    | 171                                 | ⊕⊕⊕○                              |
| <b>Falsos negativos</b>     | <b>1</b> (1 a 2)                                    | (1)                                 | <b>MODERADO</b>                   |
| <b>Verdaderos negativos</b> | <b>876</b> (786 a 935)                              | 171                                 | ⊕⊕⊕○                              |
| <b>Falsos positivos</b>     | <b>119</b> (60 a 209)                               | (1)                                 | <b>MODERADO</b>                   |

## GPC para pacientes con Espondiloartritis Periférica ASOREUMA

|                                                                                                   |                     |     |   |
|---------------------------------------------------------------------------------------------------|---------------------|-----|---|
| <b>Complicaciones **</b>                                                                          | <b>No reportada</b> | (0) | - |
| 1. Estudio de Cohorte trasversal que no permite evaluar el cambio y con tamaño de muestra pequeña |                     |     |   |

## Pregunta 9: Apéndice 1.

## Componentes en el cálculo de medición de actividad de la enfermedad

| Componente                            | DAS 28 | DAPSA | MDA |
|---------------------------------------|--------|-------|-----|
| Evaluación clínica                    |        |       |     |
| Recuento de articulaciones dolorosas  | 28     | 68    | 68  |
| Recuento de articulaciones inflamadas | 28     | 66    | 66  |
| PASI                                  |        |       | X   |
| LEI                                   |        |       | X   |
| Cuestionario de paciente              |        |       |     |
| VAS Global                            | X      | X     | X   |
| VAS dolor                             |        | X     | X   |
| HAQ                                   |        |       | X   |
| Evaluación de laboratorio             |        |       |     |
| PCR                                   | X      | X     |     |

PASI: Psoriasis Area and Severity, LEI: Leeds Enthesitis Index, VAS: visual analogue scale.

## Referencias:

1. Raychaudhuri SP, Wilken R, Sukhov AC, Raychaudhuri SK, Maverakis E. Management of psoriatic arthritis: Early diagnosis, monitoring of disease severity and cutting edge therapies. J Autoimmun. 2017;76:21-37.
2. Smolen JS, Schöls M, Braun J, Dougados M, FitzGerald O, Gladman DD, et al. Treating axial spondyloarthritis and peripheral spondyloarthritis, especially psoriatic arthritis, to target: 2017 update of recommendations by an international task force. Ann Rheum Dis. 2018;77(1):3-17.
3. Kerschbaumer A, Smolen JS, Aletaha D. Disease activity assessment in patients with psoriatic arthritis. Best Pract Res Clin Rheumatol. 2018;32(3):401-14.
4. Schoels MM, Aletaha D, Alasti F, Smolen JS. Disease activity in psoriatic arthritis (PsA): defining remission and treatment success using the DAPSA score. Ann Rheum Dis. mayo de 2016;75(5):811-8.

## GPC para pacientes con Espondiloartritis Periférica ASOREUMA

5. Smolen JS, Schöls M, Braun J, Dougados M, FitzGerald O, Gladman DD, et al. Treating axial spondyloarthritis and peripheral spondyloarthritis, especially psoriatic arthritis, to target: 2017 update of recommendations by an international task force. *Ann Rheum Dis* [Internet]. enero de 2018 [citado 14 de mayo de 2020];77(1):3-17. Disponible en: <https://www.ncbi.nlm.nih.gov/pmc/articles/PMC5754738/>
6. Coates LC, FitzGerald O, Merola JF, Smolen J, van Mens LJJ, Bertheussen H, et al. Group for Research and Assessment of Psoriasis and Psoriatic Arthritis/Outcome Measures in Rheumatology Consensus-Based Recommendations and Research Agenda for Use of Composite Measures and Treatment Targets in Psoriatic Arthritis. *Arthritis Rheumatol* Hoboken NJ. 2018;70(3):345-55.
7. F S, A C, M C, S G, M G. Disease Activity in Psoriatic Arthritis: Comparison of the Discriminative Capacity and Construct Validity of Six Composite Indices in a Real World [Internet]. Vol. 2014, BioMed research international. *Biomed Res Int*; 2014 [citado 27 de mayo de 2020]. Disponible en: [http://pubmed.ncbi.nlm.nih.gov/24967375/?from\\_term=DAPSA+and+MDA+and+DAS28&from\\_page=2&from\\_pos=2](http://pubmed.ncbi.nlm.nih.gov/24967375/?from_term=DAPSA+and+MDA+and+DAS28&from_page=2&from_pos=2)
8. P G, G G, F S, S T, D A. Prevalence of Psoriatic Arthritis and Joint Complaints in a Large Population of Italian Patients Hospitalised for Psoriasis [Internet]. Vol. 15, *European journal of dermatology : EJD. Eur J Dermatol*; 2005 [citado 30 de mayo de 2020].
9. F S, R DA, W G. Prevalence of Musculoskeletal Conditions in an Italian Population Sample: Results of a Regional Community-Based Study. I. The MAPPING Study [Internet]. Vol. 23, *Clinical and experimental rheumatology. Clin Exp Rheumatol*; 2005 [citado 30 de mayo de 2020].
10. van Mens LJJ, van de Sande MGH, van Kuijk AWR, Baeten D, Coates LC. Ideal target for psoriatic arthritis? Comparison of remission and low disease activity states in a real-life cohort. *Ann Rheum Dis*. 2018;77(2):251-7.
11. Wervers K, Vis M, Tchetveriko I, Gerards AH, Kok MR, Appels CWY, et al. Burden of Psoriatic Arthritis According to Different Definitions of Disease Activity: Comparing Minimal Disease Activity and the Disease Activity Index for Psoriatic Arthritis. *Arthritis Care Res*. 2018;70(12):1764-70.
12. Helliwell PS, Kavanaugh A. Comparison of composite measures of disease activity in psoriatic arthritis using data from an interventional study with golimumab. *Arthritis Care Res*. mayo de 2014;66(5):749-56.
13. Fei JZ, Perruccio AV, Ye JY, Gladman DD, Chandran V. The relationship between patient acceptable symptom state and disease activity in patients with psoriatic arthritis. *Rheumatol Oxf Engl*. 01 de 2020;59(1):69-76.
14. Kawalec P, Malinowski KP, Pilc A. Disease activity, quality of life and indirect costs of psoriatic arthritis in Poland. *Rheumatol Int* [Internet]. 2016 [citado 14 de mayo de 2020].

## GPC para pacientes con Espondiloartritis Periférica ASOREUMA

2020];36:1223-30.

Disponible

en:

<https://www.ncbi.nlm.nih.gov/pmc/articles/PMC4983289/>

15. Poole CD, Lebmeier M, Ara R, Rafia R, Currie CJ. Estimation of health care costs as a function of disease severity in people with psoriatic arthritis in the UK. *Rheumatol Oxf Engl.* octubre de 2010;49(10):1949-56.

## GPC para pacientes con Espondiloartritis Periférica ASOREUMA

Pregunta 10.¿En el tratamiento de pacientes adultos con Espondiloartritis Periférica, el uso de terapia combinada de MTX y DMARDs biológicos (anti TNF $\alpha$  , anti IL-17, anti IL 12-23, inhibidores JAK), es más efectivo (control enfermedad, remisión/baja actividad de síntomas, mejoría de escalas de funcionalidad) y seguro (eventos adversos) que el uso de monoterapia con DMARDs biológicos (anti TNF $\alpha$  , anti IL-17, anti IL 12-23, inhibidores JAK)?

|                     |                                                         |         |
|---------------------|---------------------------------------------------------|---------|
| <b>Población</b>    | Pacientes con espondiloartritis periférica              |         |
| <b>Intervención</b> | Terapia combinada (Metotrexate más DMARD biológicos)    |         |
| <b>Comparación</b>  | Monoterapia (DMARD biológico)                           |         |
| <b>Desenlaces</b>   | Control enfermedad- Remisión/baja actividad de síntomas | Crítico |
|                     | Control enfermedad- Mejoría en escalas de funcionalidad | Crítico |
|                     | Control enfermedad- progresión radiográfica             | Crítico |
|                     | calidad de vida                                         | Crítico |
|                     | Perfil de seguridad: Eventos adversos                   | Crítico |

### Antecedentes

La artritis psoriásica es una enfermedad inflamatoria asociada con daño articular, alteración en la función, dolor y reducción en la calidad de vida; afecta a aproximadamente el 30% de los pacientes con psoriasis(1).

El manejo farmacológico de la espondiloartritis periférica incluye los AINES, glucocorticoides y DMARD, de estos últimos se dispone de tres clases: DMARD sintéticos convencionales, DMARD biológicos y DMARD sintéticos específicos. (2)

En patologías como la Artritis reumatoide el tratamiento con anti TNF en combinación con metotrexate (MTX) ha demostrado ser más eficaz que si se utiliza el anti TNF en monoterapia, a raíz de lo cual se recomienda el uso combinado en esta entidad; en psoriasis cutánea el metotrexate es una terapia efectiva y ha sido históricamente empleado bajo el supuesto de que la patología articular es similar a la cutánea en la psoriasis. (3) La revisión sistemática de Cochrane publicada en 2019 cuyo objetivo fue evaluar los beneficios y daños del metotrexate en APs mostró con evidencia de baja calidad que dosis bajas de 15 mg o menos por 6 meses podrían ser más efectivas que el placebo, sin embargo se reportó incertidumbre con respecto a los posibles

## GPC para pacientes con Espondiloartritis Periférica ASOREUMA

daños, los efectos del metotrexato en la calidad de vida relacionada con la salud, la progresión radiográfica, la entesitis, la dactilitis y la fatiga; el beneficio más allá de los seis meses; y los efectos de dosis altas de metotrexato no se han medido ni informado en ensayos aleatorizados controlados con placebo(4).

Los DMARD biológicos (anti TNF: adalimumab, etanercept, infliximab, golimumab y certolizumab; antagonistas de las interleucinas: ustekinumab, secukinumab y ixekizumab; abatacept e inhibidores JAK: Tofacitinib) han mostrado por medio de revisiones sistemáticas y meta-análisis en red ser efectivos y tener aceptable perfil de seguridad en pacientes con artritis psoriásica(5).

Guías como la Espoguía recomiendan el uso combinado de anti TNF y metotrexate como una buena estrategia para conseguir una mejor respuesta en pacientes con compromiso grave o moderado, pero la generación de dicha recomendación no contó con estudios con comparaciones directas de efectividad y seguridad entre el tratamiento combinado con metotrexate y DMARD biológicos (6).

### Evidencia

La búsqueda de la literatura realizada (ver anexo-Excel) identificó una revisión sistemática que evaluó los inhibidores de TNF como monoterapia vs la combinación de dicha terapia con metotrexate(7). Sin embargo, la evaluación de la terapia combinada con MTX, ha sido evaluada en algunos registros de pacientes que se describirán más adelante. (8)(9)

### Efectividad

Behrens y cols (7) en 2015 publicaron una revisión sistemática de la literatura de ensayos clínicos aleatorizados y estudios observacionales que compararon la monoterapia con anti TNF vs terapia combinada con metotrexate en APs. Fueron incluidos 11 estudios y tres publicaciones de resumen, se relacionan los resultados de efectividad con respecto a los ECA.

### *Tasas de respuesta ACR*

No se encontraron diferencias en APs evaluadas por la tasa de respuesta ACR entre los pacientes tratados con y sin MTX. El estudio ADEPT de adalimumab no encontró diferencias para los criterios ACR20, ACR50, ACR 70 a las semanas 12 y 48 (10)(11). El estudio GO-REVEAL no reportó efectos del manejo concomitante con metotrexate sobre ACR20, ACR50, ACR 70 a la semana 14, 2 años y 5 años. (12)(13)

No se identificaron diferencias en la respuesta a etanercept con o sin MTX a 12 semanas de seguimiento (14). El ensayo IMPACT, el uso concomitante de MTX no tuvo efecto sobre ACR20 a la semana 16 (15). Para certolizumab, no hubo diferencia en ACR20 en la semana 20 entre los grupos de tratamiento para cualquiera de las dosis de certolizumab investigadas. (16) (Ver Apéndice 1)

## GPC para pacientes con Espondiloartritis Periférica ASOREUMA

### *Mejoría de escalas de funcionalidad*

El estudio IMPACT 2 mostró mejoría significativa en el índice de discapacidad HAQ (HAQ-DI) en el grupo de infliximab comparado con el grupo placebo independiente del uso de MTX, el porcentaje promedio de mejoría con respecto a la evaluación basal en el puntaje de HAQ a la semana 14 fue de 34% en los que recibieron infliximab más MTX vs 3.7 placebo y 61% vs 36% en placebo en los que recibían infliximab como monoterapia(17).

### *Calidad de vida*

Con respecto a calidad de vida, el estudio IMPACT 2 (17) mostró un beneficio significativo en el puntaje del SF-36 en el grupo de infliximab en comparación con placebo independiente del uso basal de MTX, para los usuarios de MTX el promedio de mejoría con respecto a la evaluación basal en la semana 14 fue de 7.9 para el grupo de infliximab vs 2.9 en el grupo placebo en el componente físico, para no usuarios de MTX la mejoría correspondiente fue de 10.1 en el grupo de infliximab vs 0.5 (empeoramiento) en el grupo placebo.

### **Seguridad**

En el estudio ADEPT, nueve pacientes tuvieron elevación de los valores de transaminasas hasta tres veces por encima del límite superior de la normalidad, cinco de esos pacientes recibieron MTX (11), en el GO- REVEAL el uso concomitante de MTX no pareció afectar los valores de transaminasas a la semana 14. (12)

En el IMPACT 2, cinco pacientes del brazo de infliximab tuvieron una elevación anormal de las transaminasas a la semana 24, uno de esos pacientes estaba recibiendo de forma concomitante MTX, a la semana 54 la incidencia de eventos adversos fue similar entre los pacientes que recibían MTX y los que no recibían MTX 88 vs 83 (17).

### **Estudios observacionales complementarios**

El registro NOR-DMARD (9) fue una cohorte conducida en Noruega, los pacientes con APs que iniciaran manejo con anti TNF como monoterapia o con manejo concomitante con MTX fueron incluidos, se evaluó la respuesta a los 3,6,12 meses y la supervivencia al medicamento fue evaluada en los que recibían o no MTX como co-medicación.

Se incluyeron 440 pacientes, 170 recibían anti TNF como monoterapia y 270 en manejo concomitante con MTX, los grupos tuvieron características basales similares excepto por el número de articulaciones inflamadas, cuyo compromiso fue mayor en el grupo de manejo concomitante con MTX, la tasa de respuesta fue similar en ambos grupos, pero los análisis de supervivencia de medicamentos mostraron que para

## GPC para pacientes con Espondiloartritis Periférica ASOREUMA

infiximab había una diferencia estadísticamente significativa entre la monoterapia y la terapia con co-medicación favoreciendo a esta última ( $p=0.01$ ). El estudio evaluó así mismo las razones de discontinuación dentro de las que se encontraban la falta de efectividad (monoterapia 20% vs terapia con MTX 14%), eventos adversos (21 vs 14%).

El registro de biológicos danés DANBIO (8) en el cual se incluyeron 410 pacientes con APs de los cuales 54% recibieron manejo concomitante con MTX, a los tres meses de seguimiento 329 pacientes (80%) continuaban recibiendo manejo con MTX. En el análisis de regresión de Cox, el género masculino, valores de PCR  $>10\text{mg/dl}$ , el uso de MTX y un bajo puntaje en la escala visual análoga estuvieron asociados con una mayor supervivencia.

### Valores y preferencia de pacientes

Nota y cols (18) realizaron una encuesta de corte transversal en 894 pacientes con diagnóstico de artritis reumatoide, espondiloartritis axial y artritis psoriásica, se evaluó como la participación de los pacientes está relacionada con la satisfacción con respecto a la toma de decisiones y cuales factores están relacionados con los roles preferidos, los roles percibidos y la concordancia. Los pacientes recibieron un cuestionario enfocado en cuatro aspectos: a) inicio con un DMARD tradicional b) inicio de inyecciones de metotrexate c) inicio de biológico DMARD d) disminución o suspensión de DMARD. La tasa de respuesta fue de 58%, para todas las decisiones la mayoría de los pacientes (59-63%) prefirieron la toma de decisiones compartida. Con respecto a los roles percibidos los participantes consideraron que el inicio de los DMARD convencionales se realiza por parte del médico en su mayoría (72%), pero con respecto a los medicamentos biológicos en un 50% la decisión fue compartida y en un 44% fue tomada por el médico.

Se consideró que los pacientes prefieren una mayor participación en la toma de decisiones con respecto al inicio de un primer DMARD tradicional, lo cual ocurre más frecuentemente en pacientes recién diagnosticados. Percibir muy poca participación se asoció con una menor satisfacción.

### Consumo de recursos y costos

Betts y cols en 2016 (19) publicaron una comparación indirecta y análisis de costos por respondedor para adalimumab, MTX y apremilast, para efectos de la actual revisión, los hallazgos con respecto a esta última terapia no serán descritos. Con respecto a los costos de tratamiento, adalimumab tuvo el mayor costo a la semana 16 (\$ 10.010.44) y el MTX (\$436.09). El costo incremental por respondedor para adalimumab en comparación con metotrexato fue (\$ 37,517).

## GPC para pacientes con Espondiloartritis Periférica ASOREUMA

Si bien el metotrexato tuvo las tasas más bajas de ACR20, también tuvo los costos incrementales más bajos por respuesta de ACR20 debido a sus costos de medicamentos más bajos. Si el metotrexato no es una opción de tratamiento viable (por ejemplo, debido a intolerancia o contraindicación), adalimumab proporciona un NNT más bajo.

## Pregunta 10: Marco de trabajo –De la evidencia a las decisiones

| <b>PREGUNTA</b>               |                                                                                                                                               |
|-------------------------------|-----------------------------------------------------------------------------------------------------------------------------------------------|
| <b>POBLACION</b>              | <i>Pacientes con espondiloartritis periférica</i>                                                                                             |
| <b>INTERVENCIÓN</b>           | <i>Metotrexate más DMARD biológicos</i>                                                                                                       |
| <b>COMPARACIÓN</b>            | <i>DMARD biológicos</i>                                                                                                                       |
| <b>DESENLACES PRINCIPALES</b> | <i>Eficaz (control enfermedad, remisión/baja actividad de síntomas<br/>Mejoría de escalas de funcionalidad)<br/>Seguro (eventos adversos)</i> |
| <b>ÁMBITO</b>                 | <i>Ambulatorio</i>                                                                                                                            |
| <b>PERSPECTIVA</b>            | <i>Del grupo desarrollador de la Guía</i>                                                                                                     |
| <b>CONFLICTO DE INTERÉS:</b>  | <i>No se hace manifiesto ningún conflicto de interés</i>                                                                                      |

## Evaluación

| <b>Problema</b><br>Es el problema una prioridad? |                                      |                                    |
|--------------------------------------------------|--------------------------------------|------------------------------------|
| <b>JUICIO</b>                                    | <b>EVIDENCIA DE LA INVESTIGACION</b> | <b>CONSIDERACIONES ADICIONALES</b> |

|                                                                                                                                                                             |                                                                                                                                                                                                                                                         |  |
|-----------------------------------------------------------------------------------------------------------------------------------------------------------------------------|---------------------------------------------------------------------------------------------------------------------------------------------------------------------------------------------------------------------------------------------------------|--|
| <ul style="list-style-type: none"> <li>○ No</li> <li>○ Probablemente No</li> <li>○ Probablemente Si</li> <li>○ Si</li> <li>○ Es variable</li> <li>○ No se conoce</li> </ul> | El tratamiento con MTX en combinación con terapia biológica DMARD en artritis psoriásica ha sido extrapolado de su utilidad en artritis reumatoide, pero su superioridad sobre el manejo con monoterapia biológica DMARD no ha sido demostrada en ECAs. |  |
|-----------------------------------------------------------------------------------------------------------------------------------------------------------------------------|---------------------------------------------------------------------------------------------------------------------------------------------------------------------------------------------------------------------------------------------------------|--|

### Efectos deseables (beneficios de la opción a recomendar)

¿Qué tan sustanciales son los efectos deseables de la opción?

| JUICIO                                                                                                                                                            | EVIDENCIA DE LA INVESTIGACION | CONSIDERACIONES ADICIONALES |
|-------------------------------------------------------------------------------------------------------------------------------------------------------------------|-------------------------------|-----------------------------|
| <ul style="list-style-type: none"> <li>○ Triviales</li> <li>○ Pequeños</li> <li>○ Moderados</li> <li>○ Grandes</li> <li>○ Varían</li> <li>○ No se sabe</li> </ul> |                               |                             |

### Efectos Indeseables

¿Qué tan sustanciales son los efectos indeseables que se pueden anticipar?

| JUICIO | EVIDENCIA DE LA INVESTIGACION | CONSIDERACIONES ADICIONALES |
|--------|-------------------------------|-----------------------------|
|        |                               |                             |

| <ul style="list-style-type: none"> <li>○ Triviales</li> <li>○ Pequeños</li> <li>○ Moderados</li> <li>○ Grandes</li> <li>○ Varían</li> <li>○ No se sabe</li> </ul> | Estudios como ADEPT (11), IMPACT 2 (17) y GO- REVEAL (12) no mostraron que el uso concomitante de MTX afectara los valores de transaminasas durante el seguimiento.                                                                                                                                 |                                    |                      |                                 |                        |          |              |                                     |            |              |  |
|-------------------------------------------------------------------------------------------------------------------------------------------------------------------|-----------------------------------------------------------------------------------------------------------------------------------------------------------------------------------------------------------------------------------------------------------------------------------------------------|------------------------------------|----------------------|---------------------------------|------------------------|----------|--------------|-------------------------------------|------------|--------------|--|
| <b>Certeza en la Evidencia</b><br>¿Cuál es la certeza en la evidencia global sobre los efectos de la opción a recomendar?                                         |                                                                                                                                                                                                                                                                                                     |                                    |                      |                                 |                        |          |              |                                     |            |              |  |
| <b>JUICIO</b>                                                                                                                                                     | <b>EVIDENCIA DE LA INVESTIGACION</b>                                                                                                                                                                                                                                                                | <b>CONSIDERACIONES ADICIONALES</b> |                      |                                 |                        |          |              |                                     |            |              |  |
| <ul style="list-style-type: none"> <li>○ Muy baja</li> <li>○ Baja</li> <li>○ Moderada</li> <li>○ Alta</li> <li>○ No se identificaron estudios</li> </ul>          | <table> <tr> <th>Desenlace</th><th>Importancia Relativa</th><th>Certeza de la evidencia (GRADE)</th></tr> <tr> <td>Tasas de respuesta ACR</td><td>CRITICAL</td><td>⊕⊕○○<br/>baja</td></tr> <tr> <td>Mejoría de escalas de funcionalidad</td><td>Importante</td><td>⊕⊕○○<br/>baja</td></tr> </table> | Desenlace                          | Importancia Relativa | Certeza de la evidencia (GRADE) | Tasas de respuesta ACR | CRITICAL | ⊕⊕○○<br>baja | Mejoría de escalas de funcionalidad | Importante | ⊕⊕○○<br>baja |  |
| Desenlace                                                                                                                                                         | Importancia Relativa                                                                                                                                                                                                                                                                                | Certeza de la evidencia (GRADE)    |                      |                                 |                        |          |              |                                     |            |              |  |
| Tasas de respuesta ACR                                                                                                                                            | CRITICAL                                                                                                                                                                                                                                                                                            | ⊕⊕○○<br>baja                       |                      |                                 |                        |          |              |                                     |            |              |  |
| Mejoría de escalas de funcionalidad                                                                                                                               | Importante                                                                                                                                                                                                                                                                                          | ⊕⊕○○<br>baja                       |                      |                                 |                        |          |              |                                     |            |              |  |
| <b>Valores de los pacientes</b><br>¿Hay variación o poca certeza sobre cómo valoran las personas/los pacientes los desenlaces principales?                        |                                                                                                                                                                                                                                                                                                     |                                    |                      |                                 |                        |          |              |                                     |            |              |  |
| <b>JUICIO</b>                                                                                                                                                     | <b>EVIDENCIA DE LA INVESTIGACION</b>                                                                                                                                                                                                                                                                | <b>CONSIDERACIONES ADICIONALES</b> |                      |                                 |                        |          |              |                                     |            |              |  |

|                                                                                                                                                                                                                                                                                                  |                                                                                                                                                                                                                                                                                                                                                                                                                                                                                  |                                    |
|--------------------------------------------------------------------------------------------------------------------------------------------------------------------------------------------------------------------------------------------------------------------------------------------------|----------------------------------------------------------------------------------------------------------------------------------------------------------------------------------------------------------------------------------------------------------------------------------------------------------------------------------------------------------------------------------------------------------------------------------------------------------------------------------|------------------------------------|
| <ul style="list-style-type: none"> <li>○ Variabilidad o incertidumbre importante</li> <li>○ Posiblemente hay variabilidad o incertidumbre importante</li> <li>○ Posiblemente No hay variabilidad o incertidumbre importante</li> <li>○ No hay variabilidad o incertidumbre importante</li> </ul> | <p>No se encontró evidencia con respecto a preferencia de pacientes sobre la terapia combinada vs monoterapia con DMARD biológicos, pero los pacientes reportaron en el estudio de Nota y cols (18) que prefieren una mayor participación en la toma de decisiones con respecto al inicio de un primer DMARD tradicional, lo cual ocurre más frecuentemente en pacientes recientemente diagnosticados. Percibir muy poca participación se asoció con una menor satisfacción.</p> |                                    |
| <b>Balance de los efectos</b><br>¿El balance entre los efectos deseables e indeseables favorece la opción o el comparador?                                                                                                                                                                       |                                                                                                                                                                                                                                                                                                                                                                                                                                                                                  |                                    |
| <b>JUICIO</b>                                                                                                                                                                                                                                                                                    | <b>EVIDENCIA DE LA INVESTIGACION</b>                                                                                                                                                                                                                                                                                                                                                                                                                                             | <b>CONSIDERACIONES ADICIONALES</b> |

|                                                                                                                                                                                                                                                                                                                         |                                                                                                           |                                    |
|-------------------------------------------------------------------------------------------------------------------------------------------------------------------------------------------------------------------------------------------------------------------------------------------------------------------------|-----------------------------------------------------------------------------------------------------------|------------------------------------|
| <ul style="list-style-type: none"> <li>○ Favorece al comparador</li> <li>○ Probablemente favorece al comparador</li> <li>○ No favorece al comparador ni a la opción en evaluación</li> <li>○ Probablemente favorece a la opción</li> <li>○ Favorece a la intervención</li> <li>○ Varía</li> <li>○ No se sabe</li> </ul> | Se considera que el balance entre los efectos deseables e indeseables favorece el uso de la intervención. |                                    |
| <b>Recursos Requeridos</b><br>Que tan grande es el requerimiento de recursos (costos)?                                                                                                                                                                                                                                  |                                                                                                           |                                    |
| <b>JUICIO</b>                                                                                                                                                                                                                                                                                                           | <b>EVIDENCIA DE LA INVESTIGACION</b>                                                                      | <b>CONSIDERACIONES ADICIONALES</b> |

|                                                                                                                                                                                                                                              |                                                                                                                                                                                                                                  |  |
|----------------------------------------------------------------------------------------------------------------------------------------------------------------------------------------------------------------------------------------------|----------------------------------------------------------------------------------------------------------------------------------------------------------------------------------------------------------------------------------|--|
| <ul style="list-style-type: none"> <li>○ Grandes costos</li> <li>○ Costos moderados</li> <li>○ no significantes costos ni ahorros</li> <li>○ Moderados ahorros</li> <li>○ Grandes ahorros</li> <li>○ Varían</li> <li>○ No se sabe</li> </ul> | Con respecto a los costos de tratamiento, adalimumab tuvo el mayor costo a la semana 16 (\$ 10.010.44) y el MTX (\$436.09). El costo incremental por respondedor para adalimumab en comparación con metotrexato fue (\$ 37,517). |  |
|----------------------------------------------------------------------------------------------------------------------------------------------------------------------------------------------------------------------------------------------|----------------------------------------------------------------------------------------------------------------------------------------------------------------------------------------------------------------------------------|--|

### Equidad

¿La implementación de la opción, tendrá impacto en la equidad?

| JUICIO                                                                                                                                                                                                            | EVIDENCIA DE LA INVESTIGACION | CONSIDERACIONES ADICIONALES |
|-------------------------------------------------------------------------------------------------------------------------------------------------------------------------------------------------------------------|-------------------------------|-----------------------------|
| <ul style="list-style-type: none"> <li>○ Reduce</li> <li>○ Probablemente se reduce la equidad</li> <li>○ Probablemente no impacta la equidad</li> <li>○ Probablemente incrementa</li> <li>○ Incrementa</li> </ul> | No identificada               |                             |

|                                                                                                                                                                                                                        |                                                                                                                                                                                                                                                                                                                                                                                                                                                                                                                                                                                                                                                                                                   |                                    |
|------------------------------------------------------------------------------------------------------------------------------------------------------------------------------------------------------------------------|---------------------------------------------------------------------------------------------------------------------------------------------------------------------------------------------------------------------------------------------------------------------------------------------------------------------------------------------------------------------------------------------------------------------------------------------------------------------------------------------------------------------------------------------------------------------------------------------------------------------------------------------------------------------------------------------------|------------------------------------|
| <input type="radio"/> Varia<br><input checked="" type="radio"/> No se sabe                                                                                                                                             |                                                                                                                                                                                                                                                                                                                                                                                                                                                                                                                                                                                                                                                                                                   |                                    |
| <b>Aceptabilidad</b><br>¿Es la opción aceptada por los diferentes actores involucrados en su implementación?                                                                                                           |                                                                                                                                                                                                                                                                                                                                                                                                                                                                                                                                                                                                                                                                                                   |                                    |
| <b>JUICIO</b>                                                                                                                                                                                                          | <b>EVIDENCIA DE LA INVESTIGACION</b>                                                                                                                                                                                                                                                                                                                                                                                                                                                                                                                                                                                                                                                              | <b>CONSIDERACIONES ADICIONALES</b> |
| <input type="radio"/> No<br><input type="radio"/> Probablemente no<br><input checked="" type="radio"/> Probablemente si<br><input type="radio"/> Si<br><input type="radio"/> Varia<br><input type="radio"/> No se sabe | <p>La guía de la sociedad española de reumatología (Espoguía) publicada en 2017 que empleó la herramienta SIGN para calificación de la evidencia, recomendó la utilización de terapia biológica, tanto en monoterapia como en combinación, para todas las manifestaciones periféricas de la artritis psoriásica. La terapia combinada con metotrexato puede aumentar la supervivencia de los fármacos monoclonales i-TNF, sobre todo los quiméricos.</p> <p>Pero los expertos concluyeron que era necesario realizar estudios de calidad diseñados para evaluar la efectividad del tratamiento combinado de MTX y DMARD biológicos frente al tratamiento con DMARD biológicos en monoterapia.</p> |                                    |
| <b>Factibilidad</b><br>¿Es la opción factible de IMPLEMENTAR?                                                                                                                                                          |                                                                                                                                                                                                                                                                                                                                                                                                                                                                                                                                                                                                                                                                                                   |                                    |
| <b>JUICIO</b>                                                                                                                                                                                                          | <b>EVIDENCIA DE LA INVESTIGACION</b>                                                                                                                                                                                                                                                                                                                                                                                                                                                                                                                                                                                                                                                              | <b>CONSIDERACIONES ADICIONALES</b> |
| <input type="radio"/> No<br><input type="radio"/> Probablemente no<br><input type="radio"/> Probablemente                                                                                                              | <p>No se encontraron estudios de factibilidad de pacientes en artritis psoriásica con relación a los procesos diagnósticos</p>                                                                                                                                                                                                                                                                                                                                                                                                                                                                                                                                                                    |                                    |

|                                                                                                              |  |  |
|--------------------------------------------------------------------------------------------------------------|--|--|
| si<br><input type="radio"/> Si<br><input type="radio"/> Varia<br><input checked="" type="radio"/> No se sabe |  |  |
|--------------------------------------------------------------------------------------------------------------|--|--|

## Resumen de Juicios

|                         | JUICIOS                                 |                                                      |                                                          |                                            |                          |       |                     |
|-------------------------|-----------------------------------------|------------------------------------------------------|----------------------------------------------------------|--------------------------------------------|--------------------------|-------|---------------------|
| PROBLEMA                | No                                      | Probablemente no                                     | Probablemente si                                         | Si                                         |                          | Varia | No se sabe          |
| EFFECTOS DESEABLES      | Triviales                               | Pequeños                                             | Moderados                                                | Grandes                                    |                          | Varia | No se sabe          |
| EFFECTOS INDESEABLES    | Grandes                                 | Moderados                                            | Pequeños                                                 | Triviales                                  |                          | Varia | No se sabe          |
| CERTEZA EN LA EVIDENCIA | Muy Baja                                | Baja                                                 | Moderada                                                 | Alta                                       |                          |       | No incluyó estudios |
| VALORES DE PACIENTES    | Importante incertidumbre o variabilidad | Posiblemente Importante incertidumbre o variabilidad | Probablemente No Importante incertidumbre o variabilidad | No Importante incertidumbre o variabilidad |                          |       |                     |
| BALANCE DE LOS EFECTOS  | Favorece el comparador                  | Probablemente Favorece el                            | No favorece Ni la intervención                           | Probablemente favorece la                  | Favorece la intervención | Varia | No se sabe          |

|                     | JUICIOS        |                        |                                  |                            |                 |       |            |
|---------------------|----------------|------------------------|----------------------------------|----------------------------|-----------------|-------|------------|
|                     |                | comparador             | ni el comparador                 | intervención               |                 |       |            |
| RECURSOS REQUERIDOS | Grandes costos | Moderados costos       | Costos y ahorros insignificantes | Moderados ahorros          | Grandes ahorros | Varia | No se sabe |
| EQUIDAD             | Reducida       | Probablemente reducida | Probablemente no impactada       | Probablemente incrementada | Incrementada    | Varia | No se sabe |
| ACEPTABILIDAD       | No             | Probablemente No       | Probablemente Si                 | Si                         |                 | Varia | No se sabe |
| FACTIBILIDAD        | No             | Probablemente No       | Probablemente Si                 | Si                         |                 | Varia | No se sabe |

### Tipo de Recomendación

|                                             |                                                  |                                                                           |                                                |                                           |
|---------------------------------------------|--------------------------------------------------|---------------------------------------------------------------------------|------------------------------------------------|-------------------------------------------|
| Recomendación fuerte en contra de la opción | Recomendación condicional en contra de la opción | Recomendación condicional a favor de cualquiera la opción o su comparador | Recomendación condicional a favor de la opción | Recomendación fuerte a favor de la opción |
| ○                                           | ○                                                | ○                                                                         | ○                                              | ○                                         |

### Conclusiones

#### Recomendación

En pacientes con artritis psoriásica, se recomienda de forma condicional en uso combinado de metotrexato con biológicos (anti TNF, anti IL-17, anti IL-12-23). Recomendación condicional a favor de la intervención. Certeza de la evidencia baja

### Justificación

El panel por consenso considera el balance de los efectos favorece a la intervención de terapia combinada. El uso de metotrexato puede verse asociado a mayor retención del biológico, adicionalmente puede favorecer la optimización de la dosis de este.

Consideraciones del panel:

El uso de tratamiento combinado ha sido extrapolado de su utilidad en artritis reumatoide, en la que ha mostrado el efecto favorable en la supervivencia farmacológica (mayor retención) y en la optimización de la dosis. La superioridad de la monoterapia con biológicos no ha sido demostrada en estudios clínicos.

### Consideraciones por subgrupos

El panel no identificó necesidad de hacer consideraciones especiales por subgrupos.

### Consideraciones de implementación

Se identifica la necesidad de asegurar la cobertura con DMARDs biológicos a toda la población para evitar barreras de acceso.

### Monitoreo y evaluación de cumplimiento

Se definirán como parte del plan de implementación

### **Prioridades de investigación futura**

Es necesario adelantar estudios comparativos, rigurosos que permitan definir la efectividad del tratamiento con MTX en combinación con terapia biológica DMARD en pacientes con espondiloartritis periférica, ya que la evidencia en la que se basa esta recomendación ha sido extrapolada de estudios en artritis reumatoide.

## Referencias:

1. Truong B, Rich-Garg N, Ehst BD, Deodhar AA, Ku JH, Vakil-Gilani K, et al. Demographics, clinical disease characteristics, and quality of life in a large cohort of psoriasis patients with and without psoriatic arthritis. *Clin Cosmet Investig Dermatol*. 2015;8:563-9.
2. Smolen JS, Braun J, Dougados M, Emery P, Fitzgerald O, Helliwell P, et al. Treating spondyloarthritis, including ankylosing spondylitis and psoriatic arthritis, to target: recommendations of an international task force. *Ann Rheum Dis*. enero de 2014;73(1):6-16.
3. Schmitt J, Rosumeck S, Thomaschewski G, Sporbeck B, Haufe E, Nast A. Efficacy and safety of systemic treatments for moderate-to-severe psoriasis: meta-analysis of randomized controlled trials. *Br J Dermatol*. febrero de 2014;170(2):274-303.
4. Wilsdon TD, Whittle SL, Thynne TR, Mangoni AA. Methotrexate for psoriatic arthritis. *Cochrane Database Syst Rev* [Internet]. 2019 [citado 24 de junio de 2020];(1). Disponible en: <https://www.cochranelibrary.com/cdsr/doi/10.1002/14651858.CD012722.pub2/full?highlightAbstract=arthriti%7Carthritis%7Cpsoriasi%7Cpsoriasis>
5. Ruysen-Witrand A, Perry R, Watkins C, Braileanu G, Kumar G, Kiri S, et al. Efficacy and safety of biologics in psoriatic arthritis: a systematic literature review and network meta-analysis. *RMD Open* [Internet]. 1 de febrero de 2020 [citado 24 de junio de 2020];6(1):e001117. Disponible en: <https://rmdopen.bmj.com/content/6/1/e001117>
6. EspoGuía 2018 [Internet]. SER. 2016 [citado 2 de enero de 2020]. Disponible en: <https://www.ser.es/espoguia/>
7. Behrens F, Cañete JD, Olivieri I, van Kuijk AW, McHugh N, Combe B. Tumour necrosis factor inhibitor monotherapy vs combination with MTX in the treatment of PsA: a systematic review of the literature. *Rheumatol Oxf Engl*. mayo de 2015;54(5):915-26.
8. Glinborg B, Østergaard M, Dreyer L, Krogh NS, Tarp U, Hansen MS, et al. Treatment response, drug survival, and predictors thereof in 764 patients with psoriatic arthritis treated with anti-tumor necrosis factor  $\alpha$  therapy: results from the nationwide Danish DANBIO registry. *Arthritis Rheum*. febrero de 2011;63(2):382-90.
9. Fagerli KM, Lie E, van der Heijde D, Heiberg MS, Lexberg AS, Rødevand E, et al. The role of methotrexate co-medication in TNF-inhibitor treatment in patients with psoriatic arthritis: results from 440 patients included in the NOR-DMARD study. *Ann Rheum Dis*. enero de 2014;73(1):132-7.
10. Mease PJ, Gladman DD, Ritchlin CT, Ruderman EM, Steinfeld SD, Choy EHS, et al. Adalimumab for the treatment of patients with moderately to severely active psoriatic

## GPC para pacientes con Espondiloartritis Periférica ASOREUMA

arthritis: results of a double-blind, randomized, placebo-controlled trial. *Arthritis Rheum.* octubre de 2005;52(10):3279-89.

11. Gladman DD, Mease PJ, Ritchlin CT, Choy EHS, Sharp JT, Ory PA, et al. Adalimumab for long-term treatment of psoriatic arthritis: forty-eight week data from the adalimumab effectiveness in psoriatic arthritis trial. *Arthritis Rheum.* febrero de 2007;56(2):476-88.

12. Kavanaugh A, McInnes IB, Mease PJ, Krueger GG, Gladman DD, van der Heijde D, et al. Clinical efficacy, radiographic and safety findings through 2 years of golimumab treatment in patients with active psoriatic arthritis: results from a long-term extension of the randomised, placebo-controlled GO-REVEAL study. *Ann Rheum Dis.* noviembre de 2013;72(11):1777-85.

13. Kavanaugh A, McInnes I, Mease P, Krueger GG, Gladman D, Gomez-Reino J, et al. Golimumab, a new human tumor necrosis factor alpha antibody, administered every four weeks as a subcutaneous injection in psoriatic arthritis: Twenty-four-week efficacy and safety results of a randomized, placebo-controlled study. *Arthritis Rheum.* abril de 2009;60(4):976-86.

14. Mease PJ, Kivitz AJ, Burch FX, Siegel EL, Cohen SB, Ory P, et al. Etanercept treatment of psoriatic arthritis: safety, efficacy, and effect on disease progression. *Arthritis Rheum.* julio de 2004;50(7):2264-72.

15. Antoni CE, Kavanaugh A, Kirkham B, Tutuncu Z, Burmester GR, Schneider U, et al. Sustained benefits of infliximab therapy for dermatologic and articular manifestations of psoriatic arthritis: results from the infliximab multinational psoriatic arthritis controlled trial (IMPACT). *Arthritis Rheum.* abril de 2005;52(4):1227-36.

16. Mease PJ, Fleischmann R, Deodhar AA, Wollenhaupt J, Khraishi M, Kielar D, et al. Effect of certolizumab pegol on signs and symptoms in patients with psoriatic arthritis: 24-week results of a Phase 3 double-blind randomised placebo-controlled study (RAPID-PsA). *Ann Rheum Dis.* enero de 2014;73(1):48-55.

17. Kavanaugh A, Antoni C, Krueger GG, Yan S, Bala M, Dooley LT, et al. Infliximab improves health related quality of life and physical function in patients with psoriatic arthritis. *Ann Rheum Dis* [Internet]. abril de 2006 [citado 26 de junio de 2020];65(4):471-7.

Disponible en:  
<https://www.ncbi.nlm.nih.gov/pmc/articles/PMC1798094/>

18. Nota I, Drossaert CHC, Taal E, Vonkeman HE, van de Laar MAFJ. Patient participation in decisions about disease modifying anti-rheumatic drugs: a cross-sectional survey. *BMC Musculoskelet Disord.* 4 de octubre de 2014;15:333.

19. Betts KA, Griffith J, Friedman A, Zhou Z-Y, Signorovitch JE, Ganguli A. An indirect comparison and cost per responder analysis of adalimumab, methotrexate and apremilast in the treatment of methotrexate-naïve patients with psoriatic arthritis. *Curr Med Res Opin.* 2016;32(4):721-9.

## GPC para pacientes con Espondiloartritis Periférica ASOREUMA

20. Ha B. Secukinumab: A Review in Ankylosing Spondylitis. *Drugs* [Internet]. 1 de marzo de 2019 [citado 27 de abril de 2020];79(4):433-43. Disponible en: <https://europepmc.org/article/pmc/pmc6422944>
21. Antonelli M, Khan MA, Magrey MN. Differential Adverse Events Between TNF- $\alpha$  Inhibitors and IL-17 Axis Inhibitors for the Treatment of Spondyloarthritis. *Curr Treat Options Rheumatol* [Internet]. 1 de junio de 2015 [citado 27 de abril de 2020];1(2):239-54. Disponible en: <https://doi.org/10.1007/s40674-015-0022-7>

Pregunta 10: Apéndice 1.

Tomado de Behrens 2014 (7)

## Anexo 1. Resumen de las votaciones sobre las recomendaciones generadas por cada pregunta

| Número de la pregunta                     | # total de votantes | Manifestación de conflictos de interes | Votos a favor de la recomendación | Votos en contra de la recomendación | Se abstienen del votar |
|-------------------------------------------|---------------------|----------------------------------------|-----------------------------------|-------------------------------------|------------------------|
| Pregunta # 1 (recomendación)              | 9                   | 0                                      | 9                                 |                                     |                        |
| Pregunta # 1 (consideración de subgrupos) | 9                   | 0                                      | 8                                 |                                     | 1                      |
| Pregunta # 2 (recomendación)              | 9                   | 0                                      | 8                                 |                                     | 1                      |
| Pregunta # 2 (consideración por subgrupo) | 9                   | 0                                      | 7                                 |                                     | 2                      |
| Pregunta # 3 (recomendación 1)            | 9                   | 0                                      | 9                                 |                                     |                        |

| Número de la pregunta          | # total de votantes | Manifestación de conflictos de interes | Votos a favor de la recomendación | Votos en contra de la recomendación | Se abstienen del votar |
|--------------------------------|---------------------|----------------------------------------|-----------------------------------|-------------------------------------|------------------------|
| Pregunta # 3 (recomendación 2) | 9                   | 0                                      | 8                                 | 1                                   |                        |
| Pregunta # 3 (recomendación 3) | 9                   | 0                                      | 8                                 |                                     | 1                      |
| Pregunta # 4                   | 9                   | 0                                      | 9                                 |                                     |                        |
| Pregunta # 5 (recomendación 1) | 9                   | 0                                      | 9                                 |                                     |                        |
| Pregunta # 5 (recomendación 2) | 9                   | 0                                      | 9                                 |                                     |                        |
| Pregunta # 6                   | 9                   | 0                                      | 7                                 | 2                                   |                        |
| Pregunta # 7                   | 10                  | 0                                      | 10                                |                                     |                        |

| Número de la pregunta | # total de votantes | Manifestación de conflictos de interes | Votos a favor de la recomendación | Votos en contra de la recomendación | Se abstienen del votar |
|-----------------------|---------------------|----------------------------------------|-----------------------------------|-------------------------------------|------------------------|
| Pregunta # 8          | 10                  | 0                                      | 9                                 |                                     | 1                      |
| Pregunta # 9          | 10                  | 0                                      | 9                                 |                                     | 1                      |
| Pregunta # 10         | 10                  | 0                                      | 8                                 |                                     | 2                      |
